# Supplementary material for: Widespread changes in sexual behaviour in eastern and southern Africa: Challenges to achieving global HIV targets? Longitudinal analyses of nationally representative surveys
Source: PubMed Central journal article supplement (PMC6587908; doi:10.1002/jia2.25329), 2019-06-21
Supplement: JIA2-22-e25329-s001.pdf [file JIA2-22-e25329-s001.pdf]

# Widespread changes in sexual behaviour in eastern and southern Africa: Challenges to achieving global HIV targets? Longitudinal analyses of nationally representative surveys

*Schaefer et al.*

*Supporting information*

Sections in this supporting information document are numbered and referred to with these numbers in the main article.

## **Table of contents of the supporting information**

|                                                                           |    |
|---------------------------------------------------------------------------|----|
| 1. Details on data, measures, and methods .....                           | 2  |
| 2. ART availability in eastern and southern Africa .....                  | 4  |
| 3. Additional data and results on primary sexual behaviour measures ..... | 5  |
| 4. Data and results on secondary sexual behaviour measures .....          | 9  |
| 5. Analysis by HIV status .....                                           | 18 |
| 6. Sensitivity analysis: Including non-sexually active individuals .....  | 22 |
| 7. References .....                                                       | 30 |

## 1. Details on data, measures, and methods

Table S1 provides information on the included surveys and the data available in each. Below details on the measures of sexual behaviour as well as the methods used for the analyses are provided. Further details on data and measures are also provided online (<https://dhsprogram.com/>).

### *Recent sexual activity:*

The denominator for most analyses in this study was everyone who reported sexual intercourse in the past 12 months. This was based on the question “when was the last time you had sexual intercourse?” that was posed to everyone who reported having ever had sexual intercourse before.

### *Multiple sexual partnerships:*

Multiple partnerships were based on the question “in total, with how many different people have you had sexual intercourse in the last 12 months?” that was asked from DHS phase 4 surveys onwards.

### *Non-regular and casual sexual partnerships:*

From DHS phase 4 onwards, data on the type of sexual partners in the past 12 months were gathered with the question “what is your relationship to the man/woman with whom you last had sex?” Non-regular sexual partners were all types of non-spousal, non-cohabiting partners. Casual partners were those referred to as ‘casual acquaintance’ or ‘commercial sex worker/client’. Casual partners are one type of non-regular partners. In DHS phase 4 surveys, these data were collected for the last two sexual partners in the past 12 months; from DHS phase 5 surveys, these data were collected for the last three sexual partners in the past 12 months. Some phase 5 or later surveys did only collect these data on the last two sexual partners. However, since very few people report three previous sexual partners, these differences have negligible effects.

### *Age at first sex:*

The question on age at first sex was asked everyone reporting ever having had sexual intercourse: “How old were you when you first had sexual intercourse?” Analyses on age at first sex were restricted to everyone who had sex (irrespective of sexual activity in the past 12 months) and those aged 20-29 years.

### *Condom use:*

A question on condom use was asked from DHS phase 3 surveys onwards. In phase 3 surveys, those who reported having ever had sexual intercourse were asked: “the last time you had sex, was a condom used?” From phase 4 onwards, this question was asked for each sexual partner in the past 12 months. In phase 4, the wording was “the last time you had sexual intercourse, was a condom used?” and, referring to another sexual partner in the past 12 months, “have you had sex with any other man in the last 12 months?” From phase 5 onwards, the wording was “the last time you had sexual intercourse (with this second/third person), was a condom used?” Condom use with non-regular or casual partners was defined as condom use the person had last sex with a non-regular or casual partner, which may not be the last sexual partner in the past 12 months.

### *Details on methods:*

To create nationally representative samples, surveys tended to over-sample certain region, which required the application of survey sampling weights to the data so that results are nationally representative. These sampling weights were supplied with each DHS data set. Moreover, individuals were sampled in clusters in each survey. The size and numbers of these clusters differed markedly between countries and within countries over several surveys. Details are provided on the DHS website (<https://dhsprogram.com/>). Responses of individuals within the same clusters tend to be correlated (non-independence), so this sample design clustering needs to be accounted for. All analyses were conducted in STATA Release 14 (StataCorp. 2015. College Station, TX: StataCorp LP); the svy command was used to apply survey sampling weights and account for sample clustering (see the survey data reference manual for details [1]).

**Table S1:** Description and data availability for all included surveys.

| Country               | Survey                | (Phase)  | Mid-point <sup>a</sup> | Sample size <sup>b</sup> |       | HIV status | Age first sex | Multiple partners | Partner type | Condom use last sex | Condom use by partner type |
|-----------------------|-----------------------|----------|------------------------|--------------------------|-------|------------|---------------|-------------------|--------------|---------------------|----------------------------|
|                       |                       |          |                        | M                        | F     |            |               |                   |              |                     |                            |
| Ethiopia              | DHS 2000              | (4)      | Apr 2000               | 1434                     | 9474  |            | ✓             | ✓                 | ✓            | ✓                   | ✓                          |
|                       | DHS 2005              | (4)      | Jun 2005               | 3197                     | 4199  | ✓          | ✓             | ✓                 | ✓            | ✓                   | ✓                          |
|                       | DHS 2011              | (6)      | Mar 2011               | 7708                     | 10390 | ✓          | ✓             | ✓                 | ✓            | ✓                   | ✓                          |
|                       | DHS 2016              | (7)      | Mar 2016               | 7186                     | 9894  |            | ✓             | ✓                 | ✓            | ✓                   | ✓                          |
| Kenya                 | DHS 1998 <sup>c</sup> | (3)      | Apr 1998               | 2579                     | 5560  |            | ✓             |                   |              | ✓                   |                            |
|                       | DHS 2003              | (4)      | Jun 2003               | 2355                     | 5678  | ✓          | ✓             | ✓                 | ✓            | ✓                   | ✓                          |
|                       | DHS 2008/09           | (5)      | Dec 2008               | 2329                     | 5995  | ✓          | ✓             | ✓                 | ✓            | ✓                   | ✓                          |
|                       | DHS 2014              | (6)      | Jul 2014               | 8698                     | 10680 |            | ✓             | ✓                 | ✓            | ✓                   | ✓                          |
| Lesotho <sup>d</sup>  | DHS 2004              | (4)      | Nov 2004               | 1746                     | 4915  | ✓          | ✓             | ✓                 | ✓            | ✓ <sup>d</sup>      | ✓ <sup>d</sup>             |
|                       | DHS 2009              | (5)      | Nov 2009               | 2236                     | 5524  | ✓          | ✓             | ✓                 | ✓            | ✓                   | ✓                          |
|                       | DHS 2014              | (6)      | Oct 2014               | 2006                     | 4923  | ✓          | ✓             | ✓                 | ✓            | ✓                   | ✓                          |
| Malawi                | DHS 2000              | (4)      | Sep 2000               | 2307                     | 10295 |            | ✓             | ✓                 | ✓            | ✓                   | ✓                          |
|                       | DHS 2004              | (4)      | Nov 2004               | 2418                     | 9159  | ✓          | ✓             | ✓                 | ✓            | ✓                   | ✓                          |
|                       | DHS 2010              | (5)      | Aug 2010               | 4967                     | 16977 | ✓          | ✓             | ✓                 | ✓            | ✓                   | ✓                          |
|                       | DHS 2015/16           | (7)      | Dec 2015               | 5433                     | 18316 | ✓          | ✓             | ✓                 | ✓            | ✓                   | ✓                          |
| Mozambique            | DHS 1997 <sup>c</sup> | (3)      | May 1997               | 1660                     | 5860  |            | ✓             |                   |              | ✓                   |                            |
|                       | DHS 2003              | (4)      | Oct 2003               | 2106                     | 9744  |            | ✓             | ✓                 | ✓            | ✓                   | ✓                          |
|                       | AIS 2009              | (5)      | Jul 2009               | 3568                     | 4606  | ✓          | ✓             | ✓                 | ✓            | ✓                   | ✓                          |
|                       | DHS 2011              | (6)      | Aug 2011               | 3118                     | 10445 |            | ✓             | ✓                 | ✓            | ✓                   | ✓                          |
|                       | AIS 2015              | (7)      | Jul 2015               | 4067                     | 5589  | ✓          | ✓             | ✓                 | ✓            | ✓                   | ✓                          |
| Namibia               | DHS 2000              | (4)      | Oct 2000               | 2071                     | 4712  |            | ✓             | ✓                 | ✓            | ✓                   | ✓                          |
|                       | DHS 2006/07           | (5)      | Jan 2007               | 2735                     | 6597  |            | ✓             | ✓                 | ✓            | ✓                   | ✓                          |
|                       | DHS 2013              | (6)      | Jul 2013               | 2897                     | 6697  | ✓          | ✓             | ✓                 | ✓            | ✓                   | ✓                          |
| Rwanda                | DHS 2000              | (4)      | Jul 2000               | 1401                     | 5173  |            | ✓             | ✓                 | ✓            | ✓                   | ✓                          |
|                       | DHS 2005              | (4)      | Apr 2005               | 2391                     | 7565  | ✓          | ✓             | ✓                 | ✓            | ✓                   | ✓                          |
|                       | DHS 2010              | (6)      | Dec 2010               | 3181                     | 5851  | ✓          | ✓             | ✓                 | ✓            | ✓                   | ✓                          |
|                       | DHS 2014/15           | (6)      | Jan 2015               | 3296                     | 5173  | ✓          | ✓             | ✓                 | ✓            | ✓                   | ✓                          |
| Tanzania <sup>e</sup> | DHS 1996 <sup>c</sup> | (3)      | Sep 1996               | 1368                     | 5410  |            | ✓             |                   |              | ✓                   |                            |
|                       | DHS 1999              | (3)      | Oct 1999               | 2460                     | 3079  |            | ✓             |                   |              | ✓                   |                            |
|                       | AIS 2003/4            | (5)      | Jan 2004               | 4173                     | 5294  | ✓          | ✓             | ✓                 | ✓            | ✓                   | ✓                          |
|                       | DHS 2004/05           | (4)      | Dec 2004               | 1880                     | 7704  |            | ✓             | ✓                 | ✓            | ✓                   | ✓                          |
|                       | AIS 2007/08           | (5)      | Dec 2007               | 4665                     | 6789  | ✓          | ✓             | ✓                 | ✓            | ✓                   | ✓                          |
|                       | DHS 2010              | (5)      | Feb 2010               | 1750                     | 7585  |            | ✓             | ✓                 | ✓            | ✓                   | ✓                          |
|                       | AIS 2011/12           | (6)      | Feb 2012               | 6060                     | 8237  | ✓          | ✓             | ✓                 | ✓            | ✓                   | ✓                          |
| DHS 2015/16           | (7)                   | Nov 2015 | 2629                   | 10216                    |       | ✓          | ✓             | ✓                 | ✓            | ✓                   |                            |
| Uganda                | DHS 1995 <sup>c</sup> | (3)      | May 1995               | 1428                     | 5145  |            | ✓             |                   |              | ✓                   |                            |
|                       | DHS 2000/01           | (4)      | Dec 2000               | 1382                     | 5490  |            | ✓             | ✓                 | ✓            | ✓                   | ✓                          |
|                       | DHS 2006              | (5)      | Jul 2006               | 1708                     | 6221  |            | ✓             | ✓                 | ✓            | ✓                   | ✓                          |
|                       | DHS 2011 <sup>f</sup> | (6)      | Sep 2011               | 1575                     | 6174  |            | ✓             | ✓                 | ✓            | ✓                   | ✓                          |
|                       | DHS 2016              | (7)      | Aug 2016               | 3722                     | 13713 |            | ✓             | ✓                 | ✓            | ✓                   | ✓                          |
| Zambia                | DHS 1996 <sup>c</sup> | (3)      | Oct 1996               | 1371                     | 5519  |            | ✓             |                   |              | ✓                   |                            |
|                       | DHS 2001/02           | (4)      | Feb 2002               | 1558                     | 5643  |            | ✓             | ✓                 | ✓            | ✓                   | ✓                          |
|                       | DHS 2007              | (5)      | Jul 2007               | 4446                     | 5321  | ✓          | ✓             | ✓                 | ✓            | ✓                   | ✓                          |
|                       | DHS 2013/14           | (6)      | Dec 2013               | 10142                    | 12235 | ✓          | ✓             | ✓                 | ✓            | ✓                   | ✓                          |
| Zimbabwe              | DHS 1994 <sup>c</sup> | (3)      | Sep 1994               | 1426                     | 4278  |            | ✓             |                   |              | ✓                   |                            |
|                       | DHS 1999              | (4)      | Oct 1999               | 1680                     | 4178  |            | ✓             | ✓                 | ✓            | ✓                   | ✓                          |
|                       | DHS 2005/06           | (5)      | Nov 2005               | 4302                     | 5839  | ✓          | ✓             | ✓                 | ✓            | ✓                   | ✓                          |
|                       | DHS 2010/11           | (6)      | Dec 2010               | 4746                     | 6202  | ✓          | ✓             | ✓                 | ✓            | ✓                   | ✓                          |
|                       | DHS 2015              | (7)      | Sep 2015               | 5628                     | 7186  | ✓          | ✓             | ✓                 | ✓            | ✓                   | ✓                          |

<sup>a</sup> For surveys with even numbers of month of data collection, the mid-point was the earlier of the two middle months.

<sup>b</sup> The sample size refers to the number of males and females aged 15-49 who reported to have had sex in the past 12 months.

<sup>c</sup> DHS phase 3 surveys were used only for secondary analyses on age at first sex (see below).

<sup>d</sup> The Lesotho 2004 DHS only collected condom use information on females.

<sup>e</sup> The Tanzania DHS 2015/16 included only a reduced sexual behaviour section, including age at first sex and condom during last sexual intercourse.

<sup>f</sup> There was a DHS and AIS in Uganda in 2011 but only the DHS data were included to ensure comparability with the preceding and subsequent DHS.

## 2. ART availability in eastern and southern Africa

Table S2 provides the years when ART was introduced in the eastern and southern African countries included in this analysis and when 30% of adults living with HIV were on treatment. In figures in which these periods are indicated, the first day of each of these years were used as the date of introduction.

**Table S2:** Availability of ART in the eastern and southern African countries included in the analysis.

| Country    | Introduction of ART in the public sector | 30% ART coverage (adults 15+) |
|------------|------------------------------------------|-------------------------------|
| Ethiopia   | 2005 [2]                                 | 2010 [3]                      |
| Kenya      | 2004 [4] <sup>a</sup>                    | 2010 [3]                      |
| Lesotho    | 2005 [5] <sup>b</sup>                    | 2012 [6]                      |
| Malawi     | 2003 [7]                                 | 2011 [3]                      |
| Mozambique | 2004 [8]                                 | 2014 [3]                      |
| Namibia    | 2003 [9]                                 | 2009 [10] <sup>c</sup>        |
| Rwanda     | 2003 [11]                                | 2008 [12] <sup>c</sup>        |
| Tanzania   | 2004 [13]                                | 2012 [3]                      |
| Uganda     | 2004 [14]                                | 2012 [3]                      |
| Zambia     | 2004 [15]                                | 2009 [16] <sup>c</sup>        |
| Zimbabwe   | 2005 [17] <sup>d</sup>                   | 2011 [18] <sup>c</sup>        |

The table indicates the year when antiretroviral therapy (ART) was introduced in the public healthcare sector (ART may have been available earlier through private healthcare providers). These years refer to the year when ART was made widely available for free or highly subsidised as opposed to small-scale pilot projects (see notes below). The year of 30% ART coverage refers to the year when 30% of adults (15+ years) who were HIV-positive received ART (eligibility criteria for ART were disregarded).

<sup>a</sup> Pilot provision of ART started in 2001 in 5 sites and expanded to 100 sites at the end of 2004.

<sup>b</sup> ART was first made available at the end of 2004 in one hospital and expanded to 22 sites by the end of 2005.

<sup>c</sup> For calculating ART coverage, the number of adults (15+ years) on treatment was taken from the referenced report and divided by the total estimated number of people living with HIV in the year provided by UNAIDS [3].

<sup>d</sup> Pilot started in 2004 and strongly expanded in 2005

### 3. Additional data and results on primary sexual behaviour measures

Tables S3-6 provide levels of multiple partnerships, non-regular partnerships, condomless sex with non-regular partners among those with non-regular partners, and condomless sex with non-regular partners among everyone who had sex with 95% CIs by sex for each country and survey, and p-values of logistic regressions comparing consecutive surveys, adjusted for age. Figures 1-4 in the main article present these trends over time.

**Table S3: Multiple sexual partnerships, eastern and southern Africa.**

| Country    | Survey      | (Phase) | Males      |                  |               |         | Females   |                  |               |         |
|------------|-------------|---------|------------|------------------|---------------|---------|-----------|------------------|---------------|---------|
|            |             |         | Sample     | Adj. proportions |               | Logit   | Sample    | Adj. proportions |               | Logit   |
|            |             |         | n/N        | %                | (95% CI)      | p-value | n/N       | %                | (95% CI)      | p-value |
| Ethiopia   | DHS 2000    | (4)     | 158/1434   | 10.70            | (8.44-13.47)  |         | 141/9473  | 1.58             | (1.15-2.15)   |         |
|            | DHS 2005    | (4)     | 176/3196   | 4.14             | (3.29-5.19)   | <0.0001 | 15/4195   | 0.24             | (0.11-0.50)   | <0.0001 |
|            | DHS 2011    | (6)     | 562/7706   | 5.91             | (5.09-6.84)   | 0.0095  | 73/10384  | 0.54             | (0.35-0.83)   | 0.0598  |
|            | DHS 2016    | (7)     | 443/7185   | 5.50             | (4.61-6.55)   | 0.5191  | 47/9884   | 0.43             | (0.28-0.67)   | 0.5059  |
| Kenya      | DHS 2003    | (4)     | 380/2355   | 16.53            | (14.81-18.41) |         | 130/5677  | 2.50             | (2.05-3.04)   |         |
|            | DHS 2008/09 | (5)     | 340/2326   | 13.08            | (11.30-15.08) | 0.0198  | 102/5990  | 1.67             | (1.28-2.17)   | 0.0208  |
|            | DHS 2014    | (6)     | 1381/8694  | 16.90            | (15.82-18.03) | 0.0012  | 182/10680 | 1.92             | (1.54-2.39)   | 0.3774  |
| Lesotho    | DHS 2004    | (4)     | 524/1740   | 30.19            | (27.41-33.13) |         | 578/4915  | 11.06            | (10.03-12.17) |         |
|            | DHS 2009    | (5)     | 660/2235   | 29.21            | (26.71-31.83) | 0.4829  | 493/5521  | 8.76             | (7.77-9.86)   | 0.0037  |
|            | DHS 2014    | (6)     | 666/2002   | 34.89            | (31.72-38.19) | 0.0045  | 430/4923  | 8.76             | (7.75-9.88)   | 0.9906  |
| Malawi     | DHS 2000    | (4)     | 420/2307   | 18.25            | (16.45-20.19) |         | 120/10295 | 0.99             | (0.79-1.24)   |         |
|            | DHS 2004    | (4)     | 300/2417   | 11.85            | (10.30-13.59) | <0.0001 | 97/9159   | 1.08             | (0.86-1.34)   | 0.6287  |
|            | DHS 2010    | (5)     | 650/4967   | 12.54            | (11.42-13.74) | 0.4983  | 132/16976 | 0.88             | (0.71-1.09)   | 0.2865  |
|            | DHS 2015/16 | (7)     | 969/5433   | 16.80            | (15.49-18.20) | <0.0001 | 285/18312 | 1.65             | (1.42-1.92)   | <0.0001 |
| Mozambique | DHS 2003    | (4)     | 821/2100   | 35.72            | (32.86-38.68) |         | 603/9740  | 6.22             | (5.46-7.08)   |         |
|            | AIS 2009    | (5)     | 839/3554   | 22.67            | (20.12-25.44) | <0.0001 | 180/4604  | 3.59             | (2.89-4.45)   | <0.0001 |
|            | DHS 2011    | (6)     | 1174/3102  | 32.82            | (30.86-34.85) | <0.0001 | 443/10444 | 3.61             | (3.22-4.05)   | 0.9775  |
|            | AIS 2015    | (7)     | 1028/4056  | 23.60            | (21.50-25.83) | <0.0001 | 222/5589  | 3.65             | (2.92-4.55)   | 0.9619  |
| Namibia    | DHS 2000    | (4)     | 479/2069   | 21.66            | (18.54-25.14) |         | 153/4710  | 2.87             | (2.34-3.52)   |         |
|            | DHS 2006/07 | (5)     | 414/2733   | 16.21            | (14.31-18.30) | 0.0107  | 144/6594  | 2.51             | (1.97-3.19)   | 0.3956  |
|            | DHS 2013    | (6)     | 386/2897   | 14.17            | (12.52-16.00) | 0.1737  | 213/6696  | 3.06             | (2.56-3.66)   | 0.1431  |
| Rwanda     | DHS 2000    | (4)     | 66/1401    | 4.19             | (3.15-5.56)   |         | 30/5173   | 0.50             | (0.33-0.77)   |         |
|            | DHS 2005    | (4)     | 119/2391   | 5.07             | (4.13-6.20)   | 0.2918  | 37/5851   | 0.60             | (0.42-0.85)   | 0.4436  |
|            | DHS 2010    | (6)     | 227/3181   | 7.01             | (6.19-7.92)   | 0.0084  | 79/7563   | 1.06             | (0.84-1.35)   | 0.0068  |
|            | DHS 2014/15 | (6)     | 252/3293   | 7.59             | (6.68-8.62)   | 0.3411  | 99/7978   | 1.18             | (0.94-1.46)   | 0.5175  |
| Tanzania   | AIS 2003/04 | (5)     | 1114/4168  | 27.12            | (25.49-28.80) |         | 327/5294  | 6.11             | (5.38-6.94)   |         |
|            | DHS 2004/05 | (4)     | 542/1880   | 30.08            | (27.26-33.07) | 0.0859  | 296/7704  | 4.25             | (3.68-4.90)   | 0.0003  |
|            | AIS 2007/08 | (5)     | 1061/4664  | 24.88            | (23.35-26.48) | 0.0014  | 196/6789  | 3.41             | (2.92-3.98)   | 0.0454  |
|            | DHS 2010    | (5)     | 472/1748   | 28.02            | (25.37-30.83) | 0.0472  | 291/7585  | 4.49             | (3.83-5.26)   | 0.0142  |
|            | AIS 2011/12 | (6)     | 1583/6059  | 27.44            | (25.75-29.19) | 0.7236  | 365/8236  | 4.89             | (4.28-5.58)   | 0.4014  |
| Uganda     | DHS 2000/01 | (4)     | 363/1382   | 24.60            | (21.90-27.53) |         | 136/5490  | 2.05             | (1.64-2.56)   |         |
|            | DHS 2006    | (5)     | 498/1707   | 28.69            | (26.17-31.36) | 0.0400  | 141/6220  | 2.40             | (1.98-2.91)   | 0.2440  |
|            | DHS 2011    | (6)     | 412/1574   | 25.76            | (23.16-28.54) | 0.1277  | 142/6174  | 2.20             | (1.79-2.72)   | 0.5437  |
|            | DHS 2016    | (7)     | 1063/3722  | 27.74            | (26.00-29.54) | 0.2256  | 430/13713 | 3.12             | (2.76-3.52)   | 0.0057  |
| Zambia     | DHS 2001/02 | (4)     | 405/1556   | 26.81            | (24.33-29.44) |         | 146/5643  | 2.83             | (2.36-3.38)   |         |
|            | DHS 2007    | (5)     | 909/4437   | 19.78            | (18.40-21.23) | <0.0001 | 95/5321   | 1.62             | (1.29-2.02)   | 0.0004  |
|            | DHS 2013/14 | (6)     | 2101/10138 | 21.16            | (20.03-22.34) | 0.1208  | 263/12234 | 2.25             | (1.90-2.66)   | 0.0145  |
| Zimbabwe   | DHS 1999    | (4)     | 343/1680   | 18.91            | (16.87-21.14) |         | 103/4176  | 2.37             | (1.91-2.93)   |         |
|            | DHS 2005/06 | (5)     | 579/4295   | 14.13            | (12.86-15.50) | 0.0002  | 77/5839   | 1.33             | (1.02-1.73)   | 0.0008  |
|            | DHS 2010/11 | (6)     | 718/4745   | 15.73            | (14.39-17.18) | 0.0599  | 101/6202  | 1.62             | (1.30-2.01)   | 0.2344  |
|            | DHS 2015    | (7)     | 1163/5625  | 20.66            | (19.39-21.99) | <0.0001 | 127/7182  | 1.52             | (1.22-1.90)   | 0.9044  |

Sample sizes (n/N) refer to unadjusted numbers of people reporting multiple sexual partnerships (n) among everyone who sexual intercourse in the past 12 months with data on this variable (N). Proportions (%) and 95% confidence intervals (95% CI) are adjusted for survey design and sampling weights. The p-values refer to results from logistic regressions with odds ratios of multiple sexual partnerships calculated for one survey compared with the preceding one, adjusted for age. These are also adjusted for survey design and sampling weights.

**Table S4: Non-regular sexual partnerships, eastern and southern Africa.**

| Country    | Survey      | (Phase) | Males      |                     |         |            | Females             |         |  |  |
|------------|-------------|---------|------------|---------------------|---------|------------|---------------------|---------|--|--|
|            |             |         | Sample     | Adj. proportions    | Logit   | Sample     | Adj. proportions    | Logit   |  |  |
|            |             |         | n/N        | % (95% CI)          | p-value | n/N        | % (95% CI)          | p-value |  |  |
| Ethiopia   | DHS 2000    | (4)     | 319/1434   | 19.89 (16.45-23.85) |         | 603/9467   | 4.54 (3.83-5.38)    |         |  |  |
|            | DHS 2005    | (4)     | 444/3197   | 8.58 (7.29-10.07)   | <0.0001 | 168/4199   | 2.80 (2.22-3.53)    | 0.0008  |  |  |
|            | DHS 2011    | (6)     | 1105/7708  | 9.66 (8.60-10.84)   | 0.2423  | 538/10390  | 3.97 (3.38-4.64)    | 0.0128  |  |  |
|            | DHS 2016    | (7)     | 1129/7186  | 11.23 (9.84-12.78)  | 0.0129  | 483/9894   | 3.66 (3.05-4.39)    | 0.6438  |  |  |
| Kenya      | DHS 2003    | (4)     | 893/2355   | 39.30 (36.84-41.82) |         | 1002/5678  | 17.62 (16.42-18.90) |         |  |  |
|            | DHS 2008/09 | (5)     | 821/2329   | 35.02 (32.07-38.09) | 0.1937  | 1018/5995  | 18.10 (16.45-19.88) | 0.3711  |  |  |
|            | DHS 2014    | (6)     | 3289/8698  | 40.18 (38.40-41.98) | 0.0001  | 1809/10671 | 19.42 (18.26-20.64) | 0.1043  |  |  |
| Lesotho    | DHS 2004    | (4)     | 1121/1746  | 63.02 (60.22-65.74) |         | 1794/4910  | 35.63 (33.91-37.39) |         |  |  |
|            | DHS 2009    | (5)     | 1477/2236  | 65.06 (62.62-67.43) | 0.8231  | 1861/5524  | 34.08 (32.46-35.74) | 0.1183  |  |  |
|            | DHS 2014    | (6)     | 1389/2006  | 70.14 (67.61-72.55) | <0.0001 | 1736/4923  | 35.28 (33.42-37.19) | 0.2865  |  |  |
| Malawi     | DHS 2000    | (4)     | 828/2306   | 35.11 (32.79-37.51) |         | 990/10292  | 8.89 (8.12-9.72)    |         |  |  |
|            | DHS 2004    | (4)     | 632/2417   | 25.96 (23.80-28.24) | <0.0001 | 764/9154   | 8.29 (7.44-9.24)    | 0.3040  |  |  |
|            | DHS 2010    | (5)     | 1365/4967  | 27.02 (25.18-28.95) | 0.2886  | 1470/16977 | 8.86 (8.21-9.56)    | 0.0329  |  |  |
|            | DHS 2015/16 | (7)     | 1968/5433  | 35.01 (33.20-36.85) | <0.0001 | 2455/18316 | 13.19 (12.45-13.96) | <0.0001 |  |  |
| Mozambique | DHS 2003    | (4)     | 1156/2105  | 51.40 (47.92-54.87) |         | 2337/9729  | 21.84 (20.39-23.38) |         |  |  |
|            | AIS 2009    | (5)     | 1603/3568  | 39.97 (36.42-43.63) | 0.0001  | 1046/4606  | 18.54 (16.68-20.55) | 0.0161  |  |  |
|            | DHS 2011    | (6)     | 1770/3118  | 51.56 (49.17-53.95) | <0.0001 | 2624/10445 | 21.35 (20.07-22.70) | 0.0321  |  |  |
|            | AIS 2015    | (7)     | 2006/4067  | 44.32 (41.83-46.83) | 0.0001  | 1511/5587  | 22.64 (20.75-24.65) | 0.3330  |  |  |
| Namibia    | DHS 2000    | (4)     | 1261/2069  | 62.32 (57.90-66.54) |         | 2477/4708  | 54.70 (51.55-57.82) |         |  |  |
|            | DHS 2006/07 | (5)     | 1621/2731  | 60.14 (57.52-62.71) | 0.8593  | 3152/6580  | 49.18 (47.35-51.02) | 0.0011  |  |  |
|            | DHS 2013    | (6)     | 1829/2894  | 65.89 (63.42-68.28) | <0.0001 | 3589/6693  | 56.29 (54.58-57.99) | <0.0001 |  |  |
| Rwanda     | DHS 2000    | (4)     | 223/1400   | 13.07 (11.25-15.13) |         | 368/5170   | 6.43 (5.65-7.30)    |         |  |  |
|            | DHS 2005    | (4)     | 401/2391   | 16.20 (14.47-18.10) | 0.0016  | 504/5851   | 8.18 (7.42-9.02)    | 0.0008  |  |  |
|            | DHS 2010    | (6)     | 581/3181   | 17.65 (16.17-19.24) | 0.8484  | 740/7565   | 9.43 (8.68-10.24)   | 0.0206  |  |  |
|            | DHS 2014/15 | (6)     | 656/3295   | 19.15 (17.51-20.89) | 0.0127  | 1035/7976  | 12.43 (11.64-13.27) | <0.0001 |  |  |
| Tanzania   | AIS 2003/04 | (5)     | 1899/4173  | 46.13 (44.12-48.16) |         | 1219/5294  | 23.11 (21.60-24.70) |         |  |  |
|            | DHS 2004/05 | (4)     | 775/1880   | 45.00 (41.99-48.04) | 0.3276  | 1328/7704  | 19.08 (17.68-20.56) | 0.0005  |  |  |
|            | AIS 2007/08 | (5)     | 1677/4665  | 40.66 (38.71-42.64) | 0.3032  | 1180/6789  | 20.63 (19.10-22.25) | 0.0898  |  |  |
|            | DHS 2010    | (5)     | 733/1750   | 44.67 (41.67-47.72) | 0.0160  | 1501/7585  | 22.76 (21.45-24.12) | 0.0263  |  |  |
| Uganda     | AIS 2011/12 | (6)     | 2475/6060  | 43.36 (41.55-45.18) | 0.3559  | 1626/8237  | 21.86 (20.56-23.22) | 0.4191  |  |  |
|            | DHS 2000/01 | (4)     | 437/1381   | 29.03 (25.96-32.29) |         | 855/5483   | 13.80 (12.34-15.39) |         |  |  |
|            | DHS 2006    | (5)     | 605/1708   | 35.67 (33.01-38.42) | <0.0001 | 979/6221   | 16.03 (14.85-17.29) | 0.0026  |  |  |
|            | DHS 2011    | (6)     | 531/1575   | 32.24 (29.18-35.45) | 0.0597  | 966/6174   | 15.06 (14.03-16.14) | 0.1930  |  |  |
| Zambia     | DHS 2016    | (7)     | 1483/3722  | 41.04 (38.98-43.14) | 0.0002  | 2670/13713 | 20.06 (19.07-21.09) | <0.0001 |  |  |
|            | DHS 2001/02 | (4)     | 688/1558   | 44.95 (41.96-47.97) |         | 991/5643   | 17.55 (16.20-18.98) |         |  |  |
|            | DHS 2007    | (5)     | 1742/4446  | 37.89 (36.01-39.81) | 0.0071  | 997/5321   | 16.93 (15.62-18.32) | 0.5937  |  |  |
| Zimbabwe   | DHS 2013/14 | (6)     | 4015/10139 | 39.56 (38.20-40.95) | 0.0074  | 2518/12227 | 19.09 (18.01-20.22) | 0.0013  |  |  |
|            | DHS 1999    | (4)     | 746/1680   | 42.33 (39.65-45.06) |         | 676/4178   | 13.84 (12.46-15.34) |         |  |  |
|            | DHS 2005/06 | (5)     | 1498/4300  | 34.90 (33.16-36.68) | 0.0001  | 693/5838   | 11.45 (10.37-12.63) | 0.0091  |  |  |
|            | DHS 2010/11 | (6)     | 1692/4746  | 33.91 (32.25-35.62) | 0.4624  | 863/6202   | 11.94 (10.95-13.01) | 0.4529  |  |  |
|            | DHS 2015    | (7)     | 2203/5628  | 37.25 (35.48-39.06) | <0.0001 | 1172/7186  | 14.14 (12.97-15.40) | 0.0012  |  |  |

Sample sizes (n/N) refer to unadjusted numbers of people reporting non-regular sexual partnerships (n) among everyone who sexual intercourse in the past 12 months with data on this variable (N). Proportions (%) and 95% confidence intervals (95% CI) are adjusted for survey design and sampling weights. The p-values refer to results from logistic regressions with odds ratios of non-regular sexual partnerships calculated for one survey compared with the preceding one, adjusted for age. These are also adjusted for survey design and sampling weights.

**Table S5:** Condomless non-regular sexual intercourse among everyone with non-regular partners, eastern and southern Africa.

| Country    | Survey      | (Phase) | Males     |                     |         | Females   |                     |         |
|------------|-------------|---------|-----------|---------------------|---------|-----------|---------------------|---------|
|            |             |         | Sample    | Adj. proportions    | Logit   | Sample    | Adj. proportions    | Logit   |
|            |             |         | n/N       | % (95% CI)          | p-value | n/N       | % (95% CI)          | p-value |
| Ethiopia   | DHS 2000    | (4)     | 197/319   | 69.35 (60.41-77.04) |         | 455/603   | 86.38 (81.28-90.26) |         |
|            | DHS 2005    | (4)     | 190/442   | 49.08 (41.43-56.77) | 0.0004  | 117/163   | 76.43 (64.70-85.16) | 0.1389  |
|            | DHS 2011    | (6)     | 391/1100  | 32.66 (28.23-37.41) | 0.0004  | 329/532   | 71.51 (63.88-78.09) | 0.3116  |
|            | DHS 2016    | (7)     | 468/1129  | 49.01 (43.46-54.60) | <0.0001 | 333/483   | 79.64 (73.17-84.87) | 0.0672  |
| Kenya      | DHS 2003    | (4)     | 464/892   | 53.46 (49.57-57.31) |         | 744/1001  | 76.06 (72.63-79.19) |         |
|            | DHS 2008/09 | (5)     | 302/820   | 37.56 (32.89-42.48) | <0.0001 | 630/1014  | 64.77 (60.63-68.69) | <0.0001 |
|            | DHS 2014    | (6)     | 896/3288  | 26.75 (24.62-29.00) | <0.0001 | 889/1808  | 44.55 (41.23-47.92) | <0.0001 |
| Lesotho    | DHS 2004    | (4)     | NA*       |                     |         | 1128/1794 | 60.68 (57.81-63.48) |         |
|            | DHS 2009    | (5)     | 595/1477  | 37.49 (34.34-40.74) |         | 723/1861  | 35.52 (33.11-38.00) | <0.0001 |
|            | DHS 2014    | (6)     | 356/1389  | 23.46 (20.76-26.40) | <0.0001 | 447/1736  | 23.98 (21.73-26.39) | <0.0001 |
| Malawi     | DHS 2000    | (4)     | 496/828   | 60.69 (56.40-64.82) |         | 699/990   | 71.37 (67.71-74.77) |         |
|            | DHS 2004    | (4)     | 342/632   | 53.40 (48.23-58.49) | 0.0302  | 552/763   | 69.97 (65.79-73.85) | 0.2916  |
|            | DHS 2010    | (5)     | 596/1352  | 44.29 (40.92-47.72) | 0.0035  | 831/1456  | 54.05 (50.66-57.40) | <0.0001 |
|            | DHS 2015/16 | (7)     | 505/1968  | 26.65 (24.25-29.19) | <0.0001 | 1182/2455 | 51.17 (48.33-54.00) | 0.2016  |
| Mozambique | DHS 2003    | (4)     | 715/1156  | 66.60 (62.94-70.07) |         | 1694/2335 | 75.02 (72.12-77.70) |         |
|            | AIS 2009    | (5)     | 860/1599  | 60.84 (56.21-65.28) | 0.0450  | 643/1043  | 67.44 (63.37-71.27) | 0.0006  |
|            | DHS 2011    | (6)     | 946/1770  | 59.53 (56.26-62.71) | 0.6381  | 1580/2624 | 65.82 (62.80-68.72) | 0.5403  |
|            | AIS 2015    | (7)     | 980/2005  | 56.67 (53.03-60.23) | 0.2846  | 847/1511  | 59.62 (55.90-63.23) | 0.0029  |
| Namibia    | DHS 2000    | (4)     | 408/1259  | 31.90 (28.19-35.84) |         | 1414/2477 | 57.23 (53.17-61.21) |         |
|            | DHS 2006/07 | (5)     | 342/1621  | 21.69 (19.16-24.44) | <0.0001 | 1286/3149 | 37.79 (35.43-40.22) | <0.0001 |
|            | DHS 2013    | (6)     | 405/1829  | 20.17 (18.00-22.53) | 0.2872  | 1340/3589 | 34.49 (32.45-36.59) | 0.0257  |
| Rwanda     | DHS 2000    | (4)     | 90/223    | 48.70 (40.36-57.12) |         | 296/368   | 85.13 (79.08-89.65) |         |
|            | DHS 2005    | (4)     | 247/396   | 65.15 (59.54-70.37) | 0.0062  | 398/499   | 80.35 (75.98-84.10) | 0.1720  |
|            | DHS 2010    | (6)     | 207/581   | 36.86 (32.83-41.07) | <0.0001 | 458/736   | 63.75 (59.97-67.37) | <0.0001 |
|            | DHS 2014/15 | (6)     | 217/656   | 33.95 (30.12-37.99) | 0.2945  | 531/1035  | 52.45 (49.13-55.76) | <0.0001 |
| Tanzania   | AIS 2003/04 | (5)     | 972/1892  | 50.13 (47.02-53.25) |         | 770/1216  | 61.91 (58.01-65.66) |         |
|            | DHS 2004/05 | (4)     | 391/775   | 48.88 (44.08-53.72) | 0.5943  | 907/1327  | 67.19 (63.58-70.61) | 0.0770  |
|            | AIS 2007/08 | (5)     | 815/1676  | 46.68 (43.49-49.89) | 0.5544  | 701/1178  | 57.27 (53.87-60.60) | <0.0001 |
|            | DHS 2010    | (5)     | 335/731   | 42.75 (38.14-47.5)  | 0.2059  | 890/1500  | 58.27 (55.10-61.36) | 0.6254  |
| Uganda     | AIS 2011/12 | (6)     | 1031/2469 | 39.85 (37.09-42.68) | 0.2527  | 815/1624  | 49.60 (46.30-52.91) | 0.0002  |
|            | DHS 2000/01 | (4)     | 158/437   | 39.55 (34.45-44.90) |         | 485/854   | 61.72 (57.00-66.23) |         |
|            | DHS 2006    | (5)     | 252/605   | 41.67 (37.47-45.99) | 0.5551  | 628/973   | 65.15 (61.54-68.59) | 0.2901  |
|            | DHS 2011    | (6)     | 202/531   | 38.39 (33.32-43.72) | 0.3177  | 514/966   | 54.52 (50.57-58.42) | 0.0001  |
| Zambia     | DHS 2016    | (7)     | 644/1483  | 42.72 (39.73-45.77) | 0.1638  | 1674/2670 | 62.69 (60.45-64.87) | 0.0005  |
|            | DHS 2001/02 | (4)     | 392/688   | 55.67 (51.18-60.07) |         | 662/988   | 66.92 (63.32-70.34) |         |
|            | DHS 2007    | (5)     | 862/1740  | 50.03 (47.15-52.91) | 0.0405  | 612/995   | 62.57 (58.84-66.16) | 0.0829  |
| Zimbabwe   | DHS 2013/14 | (6)     | 1844/4015 | 45.34 (43.32-47.38) | 0.0083  | 1453/2518 | 58.77 (56.24-61.26) | 0.0963  |
|            | DHS 1999    | (4)     | 248/746   | 29.50 (25.54-33.80) |         | 427/671   | 57.50 (52.96-61.91) |         |
|            | DHS 2005/06 | (5)     | 444/1497  | 28.51 (24.74-32.60) | 0.6348  | 386/693   | 54.35 (49.36-59.25) | 0.3553  |
|            | DHS 2010/11 | (6)     | 431/1692  | 23.38 (21.15-25.77) | 0.0503  | 389/863   | 42.35 (38.61-46.19) | 0.0003  |
|            | DHS 2015    | (7)     | 392/2203  | 17.82 (15.95-19.84) | 0.0005  | 413/1172  | 35.27 (32.07-38.60) | 0.0102  |

Sample sizes (n/N) refer to unadjusted numbers of people reporting not using condoms during the non-regular casual sexual intercourse (n) among everyone who reported non-regular sexual intercourse in the past 12 months with data on this variable (N). Proportions (%) and 95% confidence intervals (95% CI) are adjusted for survey design and sampling weights. The p-values refer to results from logistic regressions with odds ratios of not using condoms during last non-regular sexual intercourse calculated for one survey compared with the preceding one, adjusted for age. These are also adjusted for survey design and sampling weights.

\*The Lesotho 2004 DHS only collected condom use information on females.

**Table S6:** Condomless non-regular sexual intercourse among everyone who had a sexual partner in the past 12 months, eastern and southern Africa.

| Country    | Survey      | (Phase) | Males      |                     |         | Females    |                     |         |
|------------|-------------|---------|------------|---------------------|---------|------------|---------------------|---------|
|            |             |         | Sample     | Adj. proportions    | Logit   | Sample     | Adj. proportions    | Logit   |
|            |             |         | n/N        | % (95% CI)          | p-value | n/N        | % (95% CI)          | p-value |
| Ethiopia   | DHS 2000    | (4)     | 197/1434   | 13.79 (10.84-17.40) |         | 455/9467   | 3.92 (3.26-4.72)    |         |
|            | DHS 2005    | (4)     | 190/3197   | 4.18 (3.26-5.34)    | <0.0001 | 117/4199   | 2.08 (1.53-2.82)    | 0.0004  |
|            | DHS 2011    | (6)     | 391/7708   | 3.14 (2.63-3.75)    | 0.0523  | 329/10390  | 2.80 (2.33-3.37)    | 0.0921  |
|            | DHS 2016    | (7)     | 468/7186   | 5.50 (4.53-6.67)    | <0.0001 | 333/9894   | 2.92 (2.37-3.59)    | 0.6844  |
| Kenya      | DHS 2003    | (4)     | 464/2355   | 20.99 (19.05-23.07) |         | 744/5678   | 13.39 (12.38-14.47) |         |
|            | DHS 2008/09 | (5)     | 302/2329   | 13.15 (11.25-15.30) | <0.0001 | 630/5995   | 11.70 (10.53-12.97) | 0.0875  |
|            | DHS 2014    | (6)     | 896/8698   | 10.74 (9.82-11.75)  | 0.0314  | 889/10671  | 8.65 (7.93-9.42)    | <0.0001 |
| Lesotho    | DHS 2004    | (4)     |            |                     |         | 1128/4910  | 21.62 (20.32-22.98) |         |
|            | DHS 2009    | (5)     | 595/2236   | 24.39 (22.19-26.73) |         | 723/5524   | 12.10 (11.22-13.05) | <0.0001 |
|            | DHS 2014    | (6)     | 356/2006   | 16.46 (14.49-18.62) | <0.0001 | 447/4923   | 8.46 (7.58-9.44)    | <0.0001 |
| Malawi     | DHS 2000    | (4)     | 496/2306   | 21.31 (19.33-23.43) |         | 699/10292  | 6.34 (5.74-7.00)    |         |
|            | DHS 2004    | (4)     | 342/2417   | 13.86 (12.36-15.51) | <0.0001 | 552/9154   | 5.80 (5.22-6.44)    | 0.1891  |
|            | DHS 2010    | (5)     | 596/4967   | 11.87 (10.78-13.06) | 0.0127  | 831/16977  | 4.74 (4.30-5.22)    | 0.0689  |
|            | DHS 2015/16 | (7)     | 505/5433   | 9.33 (8.43-10.31)   | <0.0001 | 1182/18316 | 6.75 (6.21-7.32)    | <0.0001 |
| Mozambique | DHS 2003    | (4)     | 715/2105   | 34.23 (31.32-37.27) |         | 1694/9729  | 16.37 (15.23-17.59) |         |
|            | AIS 2009    | (5)     | 860/3568   | 24.24 (21.64-27.05) | <0.0001 | 643/4606   | 12.44 (11.07-13.95) | 0.0001  |
|            | DHS 2011    | (6)     | 946/3118   | 30.69 (28.69-32.77) | 0.0039  | 1580/10445 | 14.05 (13.04-15.13) | 0.1002  |
|            | AIS 2015    | (7)     | 980/4067   | 25.09 (22.96-27.34) | 0.0007  | 847/5587   | 13.50 (12.20-14.91) | 0.4795  |
| Namibia    | DHS 2000    | (4)     | 408/2069   | 19.84 (17.36-22.56) |         | 1414/4708  | 31.31 (28.76-33.98) |         |
|            | DHS 2006/07 | (5)     | 342/2731   | 13.04 (11.50-14.75) | <0.0001 | 1286/6580  | 18.57 (17.44-19.76) | <0.0001 |
|            | DHS 2013    | (6)     | 405/2894   | 13.29 (11.88-14.84) | 0.6870  | 1340/6693  | 19.42 (18.24-20.65) | 0.1845  |
| Rwanda     | DHS 2000    | (4)     | 90/1400    | 6.37 (4.98-8.10)    |         | 296/5170   | 5.47 (4.80-6.22)    |         |
|            | DHS 2005    | (4)     | 247/2391   | 10.41 (8.92-12.11)  | 0.0001  | 398/5851   | 6.51 (5.81-7.28)    | 0.0257  |
|            | DHS 2010    | (6)     | 207/3181   | 6.51 (5.65-7.48)    | <0.0001 | 458/7565   | 5.98 (5.46-6.55)    | 0.2722  |
|            | DHS 2014/15 | (6)     | 217/3295   | 6.50 (5.66-7.46)    | 0.6577  | 531/7976   | 6.52 (5.97-7.11)    | 0.1370  |
| Tanzania   | AIS 2003/04 | (5)     | 972/4173   | 23.06 (21.26-24.97) |         | 770/5294   | 14.28 (13.15-15.49) |         |
|            | DHS 2004/05 | (4)     | 391/1880   | 22.00 (19.44-24.79) | 0.3467  | 907/7704   | 12.81 (11.81-13.87) | 0.0936  |
|            | AIS 2007/08 | (5)     | 815/4665   | 18.97 (17.33-20.72) | 0.3054  | 701/6789   | 11.80 (10.84-12.83) | 0.2109  |
|            | DHS 2010    | (5)     | 335/1750   | 19.09 (16.73-21.69) | 0.9772  | 890/7585   | 13.26 (12.40-14.18) | 0.0240  |
| Uganda     | AIS 2011/12 | (6)     | 1031/6060  | 17.24 (15.89-18.68) | 0.1367  | 815/8237   | 10.84 (9.96-11.78)  | 0.0003  |
|            | DHS 2000/01 | (4)     | 158/1381   | 11.48 (9.70-13.54)  |         | 485/5483   | 8.51 (7.50-9.64)    |         |
|            | DHS 2006    | (5)     | 252/1708   | 14.86 (13.01-16.93) | 0.0044  | 628/6221   | 10.40 (9.57-11.30)  | 0.0017  |
|            | DHS 2011    | (6)     | 202/1575   | 12.37 (10.47-14.56) | 0.0685  | 514/6174   | 8.21 (7.43-9.07)    | 0.0003  |
| Zambia     | DHS 2016    | (7)     | 644/3722   | 17.53 (16.05-19.12) | 0.0021  | 1674/13713 | 12.57 (11.88-13.30) | <0.0001 |
|            | DHS 2001/02 | (4)     | 392/1558   | 25.02 (22.55-27.67) |         | 662/5643   | 11.73 (10.74-12.80) |         |
|            | DHS 2007    | (5)     | 862/4446   | 18.94 (17.55-20.41) | 0.0013  | 612/5321   | 10.57 (9.68-11.53)  | 0.5089  |
| Zimbabwe   | DHS 2013/14 | (6)     | 1844/10139 | 17.94 (17.03-18.89) | 0.3224  | 1453/12227 | 11.22 (10.48-12.00) | 0.0899  |
|            | DHS 1999    | (4)     | 248/1680   | 12.49 (10.78-14.43) |         | 427/4178   | 7.86 (6.97-8.85)    |         |
|            | DHS 2005/06 | (5)     | 444/4300   | 9.94 (8.53-11.56)   | 0.0995  | 386/5838   | 6.22 (5.47-7.08)    | 0.0086  |
|            | DHS 2010/11 | (6)     | 431/4746   | 7.93 (7.09-8.85)    | 0.0855  | 389/6202   | 5.06 (4.50-5.68)    | 0.0291  |
|            | DHS 2015    | (7)     | 392/5628   | 6.64 (5.88-7.49)    | 0.0549  | 413/7186   | 4.99 (4.40-5.66)    | 0.6293  |

Sample sizes (n/N) refer to unadjusted numbers of people reporting not using condoms during the non-regular casual sexual intercourse (n) among everyone who reported any sexual partner in the past 12 months with (N). Proportions (%) and 95% confidence intervals (95% CI) are adjusted for survey design and sampling weights. The p-values refer to results from logistic regressions with odds ratios of not using condoms during last non-regular sexual intercourse calculated for one survey compared with the preceding one, adjusted for age. These are also adjusted for survey design and sampling weights.

\*The Lesotho 2004 DHS only collected condom use information on females.



#### 4. Data and results on secondary sexual behaviour measures

Tables S7-9 provide levels of casual partnerships, condomless sex casual partners, and age at first sex below 18 years with 95% CIs by sex for each country and survey, and p-values of logistic regressions comparing consecutive surveys, adjusted for age. Figures S1-3 present these trends over time.

**Table S7:** Casual sexual partnerships, eastern and southern Africa.

| Country    | Survey      | (Phase) | Males         |                                |                  | Females       |                                |                  |
|------------|-------------|---------|---------------|--------------------------------|------------------|---------------|--------------------------------|------------------|
|            |             |         | Sample<br>n/N | Adj. proportions<br>% (95% CI) | Logit<br>p-value | Sample<br>n/N | Adj. proportions<br>% (95% CI) | Logit<br>p-value |
| Ethiopia   | DHS 2000    | (4)     | 33/1312       | 3.82 (2.50-5.81)               |                  | 88/9393       | 1.14 (0.79-1.65)               |                  |
|            | DHS 2005    | (4)     | 141/3194      | 2.65 (2.01-3.48)               | 0.0513           | 28/4193       | 0.32 (0.18-0.55)               | 0.0002           |
|            | DHS 2011    | (6)     | 345/7700      | 3.10 (2.59-3.71)               | 0.3448           | 83/10374      | 0.64 (0.42-0.97)               | 0.0486           |
|            | DHS 2016    | (7)     | 356/7182      | 3.26 (2.62-4.06)               | 0.4962           | 55/9888       | 0.55 (0.36-0.84)               | 0.6829           |
| Kenya      | DHS 2003    | (4)     | 232/2218      | 10.81 (9.21-12.64)             |                  | 54/5578       | 0.88 (0.64-1.20)               |                  |
|            | DHS 2008/09 | (5)     | 152/2327      | 6.57 (5.25-8.19)               | 0.0004           | 65/5964       | 1.28 (0.85-1.92)               | 0.1574           |
|            | DHS 2014    | (6)     | 741/8664      | 9.68 (8.75-10.69)              | 0.0012           | 147/10643     | 1.38 (1.10-1.72)               | 0.7458           |
| Lesotho    | DHS 2004    | (4)     | 71/1701       | 4.58 (3.45-6.05)               |                  | 43/4829       | 0.74 (0.50-1.11)               |                  |
|            | DHS 2009    | (5)     | 256/2236      | 11.28 (9.86-12.88)             | <0.0001          | 139/5513      | 2.86 (2.33-3.50)               | <0.0001          |
|            | DHS 2014    | (6)     | 274/2005      | 14.09 (12.07-16.38)            | 0.0347           | 175/4918      | 3.49 (2.92-4.17)               | 0.1569           |
| Malawi     | DHS 2000    | (4)     | 188/2238      | 8.84 (7.45-10.45)              |                  | 46/10267      | 0.41 (0.28-0.59)               |                  |
|            | DHS 2004    | (4)     | 147/2358      | 6.48 (5.35-7.82)               | 0.0367           | 47/9133       | 0.44 (0.31-0.64)               | 0.7813           |
|            | DHS 2010    | (5)     | 211/4951      | 4.67 (3.94-5.53)               | 0.0067           | 43/16925      | 0.29 (0.18-0.45)               | 0.1213           |
|            | DHS 2015/16 | (7)     | 349/5428      | 6.38 (5.63-7.23)               | 0.0079           | 118/18310     | 0.62 (0.47-0.80)               | 0.0044           |
| Mozambique | DHS 2003    | (4)     | 442/1882      | 23.97 (21.12-27.06)            |                  | 1007/9722     | 10.26 (9.30-11.3)              |                  |
|            | AIS 2009    | (5)     | 476/3520      | 11.65 (10.04-13.48)            | <0.0001          | 144/4542      | 2.79 (2.27-3.43)               | <0.0001          |
|            | DHS 2011    | (6)     | 960/3114      | 25.20 (23.50-26.98)            | <0.0001          | 605/10397     | 5.39 (4.87-5.97)               | <0.0001          |
|            | AIS 2015    | (7)     | 759/4065      | 16.33 (14.32-18.57)            | <0.0001          | 334/5582      | 5.28 (4.41-6.31)               | 0.8416           |
| Namibia    | DHS 2000    | (4)     | 342/1878      | 14.51 (11.06-18.81)            |                  | 60/4668       | 1.41 (0.97-2.04)               |                  |
|            | DHS 2006/07 | (5)     | 512/2727      | 18.97 (16.70-21.47)            | 0.0478           | 76/6570       | 1.23 (0.93-1.64)               | 0.5760           |
|            | DHS 2013    | (6)     | 438/2889      | 14.49 (12.84-16.32)            | 0.0049           | 93/6683       | 1.16 (0.89-1.51)               | 0.7742           |
| Rwanda     | DHS 2000    | (4)     | 98/1338       | 6.06 (4.78-7.65)               |                  | 68/5027       | 1.24 (0.94-1.62)               |                  |
|            | DHS 2005    | (4)     | 91/2323       | 3.69 (3.00-4.53)               | 0.0024           | 40/5811       | 0.63 (0.46-0.88)               | 0.0035           |
|            | DHS 2010    | (6)     | 141/3174      | 4.24 (3.58-5.02)               | 0.7127           | 53/7517       | 0.74 (0.57-0.97)               | 0.4425           |
|            | DHS 2014/15 | (6)     | 121/3295      | 3.52 (2.85-4.34)               | 0.2690           | 62/7942       | 0.69 (0.52-0.94)               | 0.7588           |
| Tanzania   | AIS 2003/04 | (5)     | 892/4161      | 20.54 (19.09-22.07)            |                  | 180/5284      | 3.34 (2.86-3.91)               |                  |
|            | DHS 2004/05 | (4)     | 413/1879      | 24.40 (22.13-26.83)            | 0.0069           | 150/7688      | 2.34 (1.93-2.83)               | 0.0070           |
|            | AIS 2007/08 | (5)     | 525/4662      | 13.37 (12.19-14.64)            | <0.0001          | 117/6782      | 2.02 (1.65-2.47)               | 0.3574           |
|            | DHS 2010    | (5)     | 173/1744      | 11.51 (9.75-13.53)             | 0.0921           | 81/7567       | 1.14 (0.87-1.49)               | 0.0009           |
| Uganda     | AIS 2011/12 | (6)     | 603/6052      | 10.62 (9.63-11.69)             | 0.3334           | 129/8229      | 1.52 (1.23-1.87)               | 0.0876           |
|            | DHS 2000/01 | (4)     | 67/1307       | 4.29 (3.17-5.79)               |                  | 33/5400       | 0.54 (0.34-0.86)               |                  |
|            | DHS 2006    | (5)     | 155/1702      | 9.49 (7.61-11.77)              | <0.0001          | 78/6189       | 1.48 (1.15-1.91)               | 0.0001           |
|            | DHS 2011    | (6)     | 110/1571      | 7.00 (5.53-8.83)               | 0.0572           | 102/6163      | 1.80 (1.41-2.30)               | 0.2755           |
| Zambia     | DHS 2016    | (7)     | 413/3722      | 11.30 (10.12-12.59)            | 0.0006           | 250/13696     | 1.90 (1.64-2.20)               | 0.7304           |
|            | DHS 2001/02 | (4)     | 195/1464      | 14.09 (12.11-16.34)            |                  | 42/5595       | 0.76 (0.56-1.04)               |                  |
|            | DHS 2007    | (5)     | 342/4439      | 7.56 (6.72-8.50)               | <0.0001          | 54/5295       | 0.91 (0.66-1.25)               | 0.3081           |
| Zimbabwe   | DHS 2013/14 | (6)     | 498/10127     | 5.17 (4.50-5.93)               | <0.0001          | 66/12198      | 0.55 (0.41-0.75)               | 0.0327           |
|            | DHS 1999    | (4)     | 79/1567       | 6.22 (4.86-7.93)               |                  | 56/4106       | 1.53 (1.08-2.16)               |                  |
|            | DHS 2005/06 | (5)     | 200/4289      | 4.77 (4.05-5.61)               | 0.0893           | 28/5824       | 0.45 (0.30-0.69)               | <0.0001          |
|            | DHS 2010/11 | (6)     | 241/4742      | 5.17 (4.44-6.00)               | 0.3053           | 45/6188       | 0.58 (0.41-0.81)               | 0.3848           |
|            | DHS 2015    | (7)     | 391/5626      | 6.64 (5.86-7.52)               | 0.0045           | 67/7182       | 0.74 (0.51-1.07)               | 0.3503           |

Sample sizes (n/N) refer to unadjusted numbers of people reporting casual sexual partnerships (n) among everyone who sexual intercourse in the past 12 months with data on this variable (N). Proportions (%) and 95% confidence intervals (95% CI) are adjusted for survey design and sampling weights. The p-values refer to results from logistic regressions with odds ratios of casual sexual partnerships calculated for one survey compared with the preceding one, adjusted for age. These are also adjusted for survey design and sampling weights.

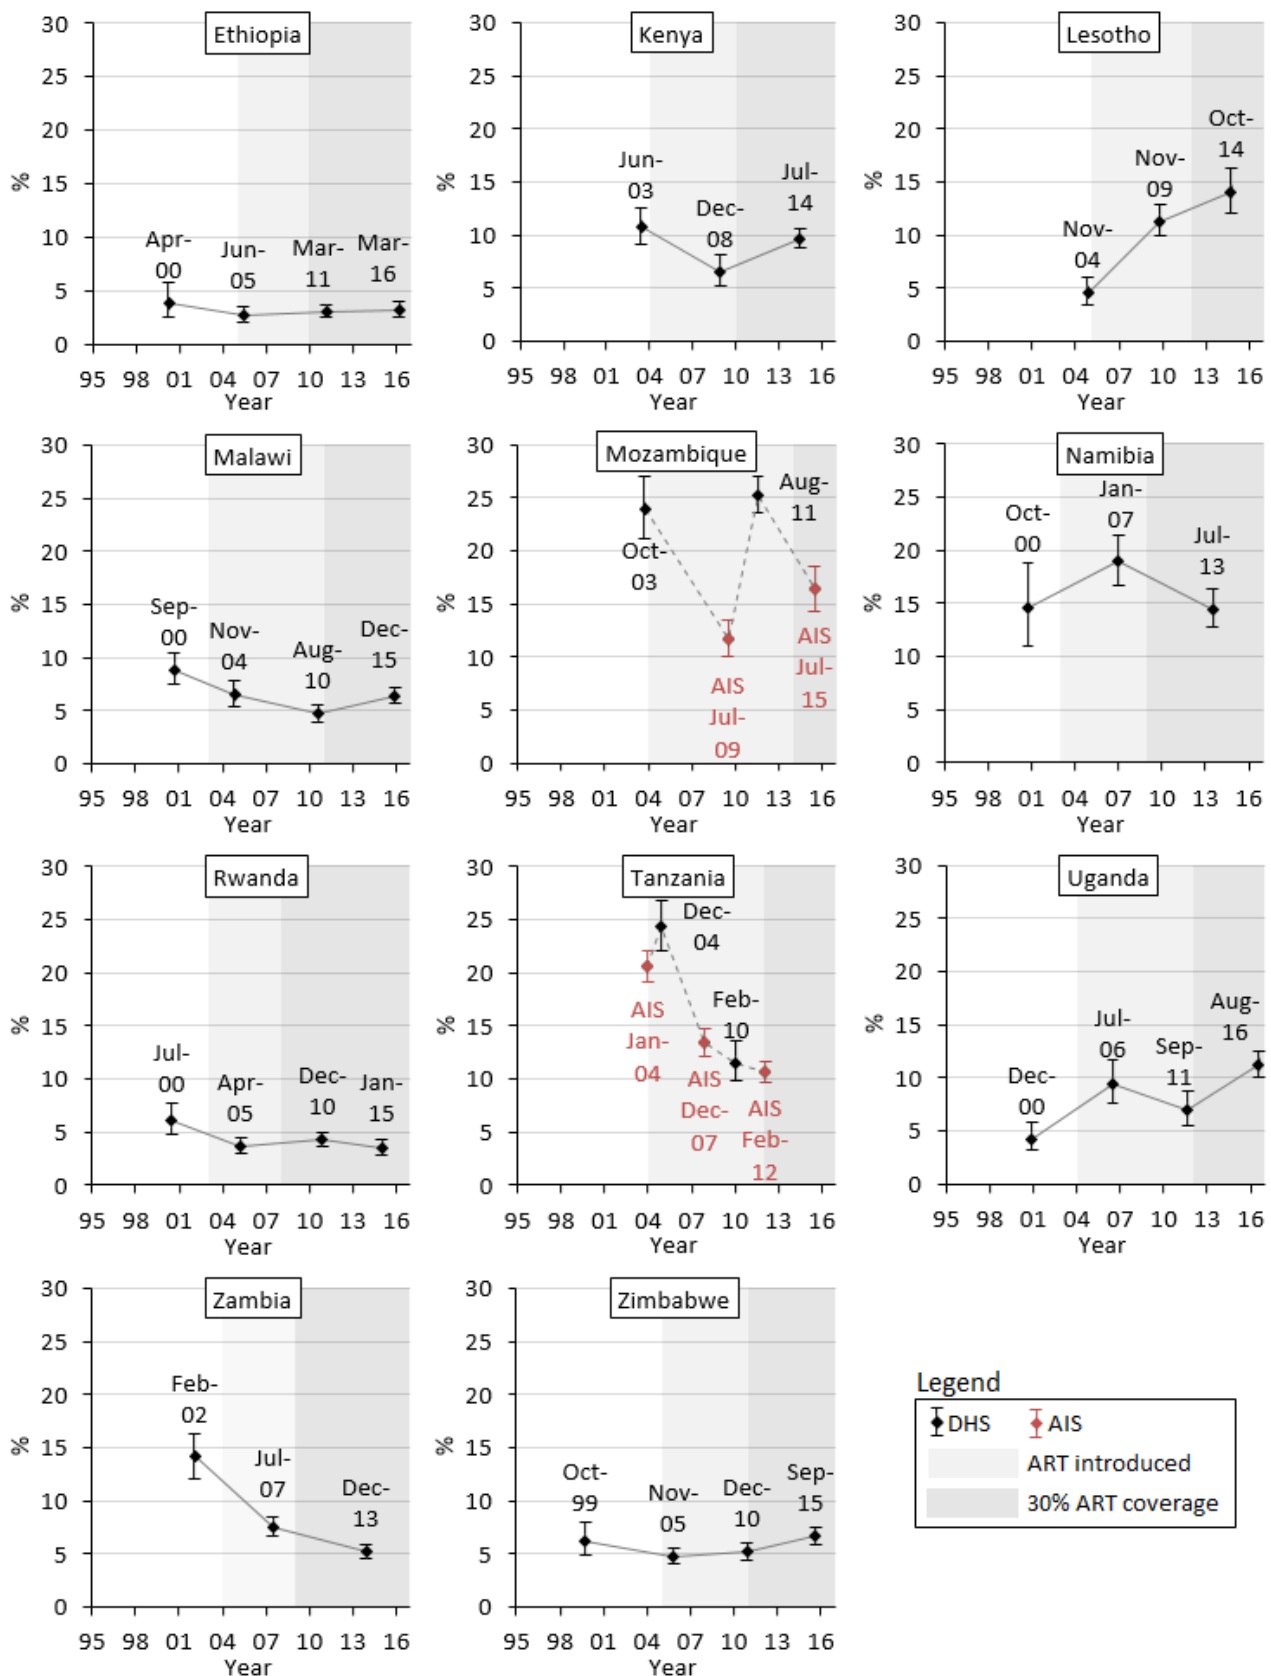

**Figure S1a. Trends in casual sexual partnerships among males (15-49 years), eastern and southern Africa.** Casual sexual partnerships were defined as reporting at least one casual sexual partner in the past 12. Dates refer to the mid-points of the survey data collection period. Data from AIS are indicated in red. Data from different survey types are linked with dashed lines. Shaded areas indicate the years in which ART was introduced into the public healthcare sector in each country and from when 30% of adult PLWH (15+ years) were in treatment (disregarding treatment eligibility criteria; see Supporting Information, Section 2).

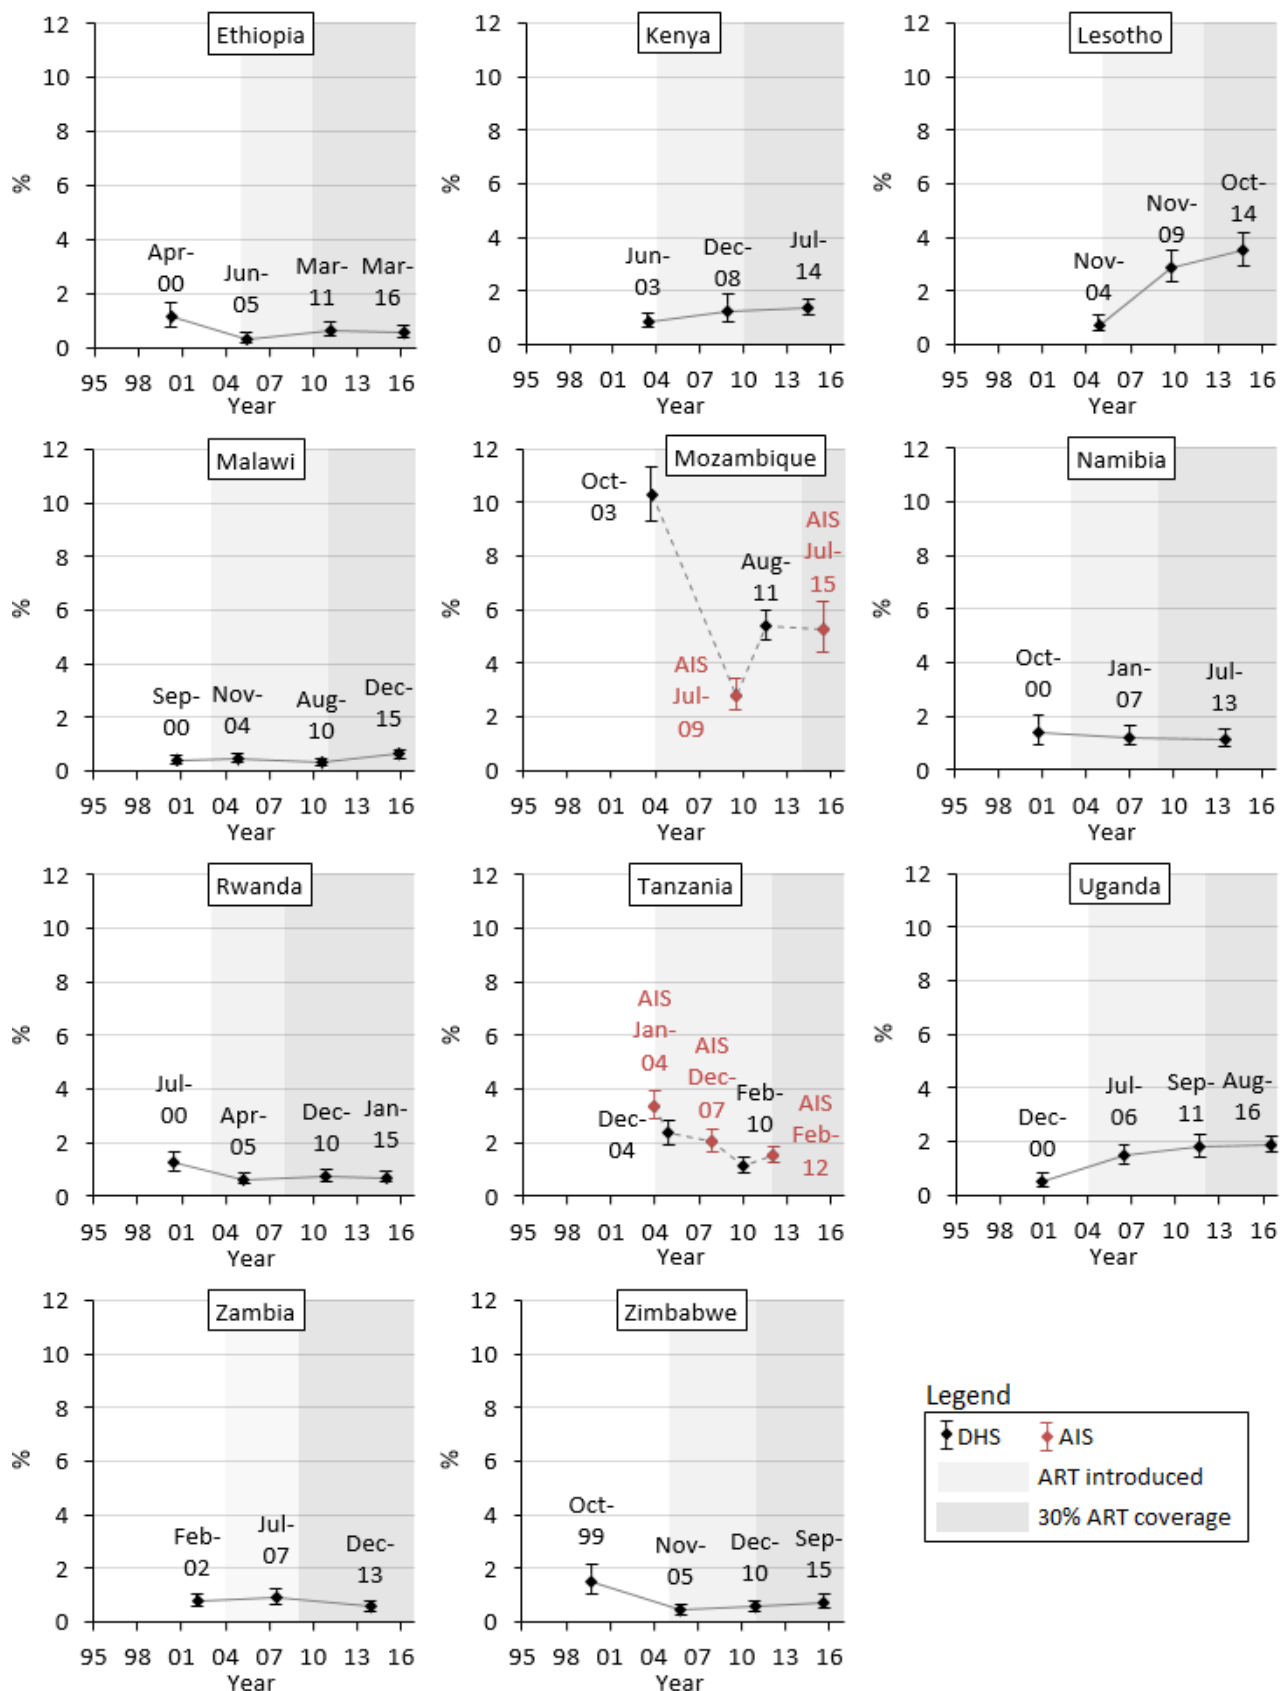

**Figure S1b. Trends in casual sexual partnerships among females (15-49 years), eastern and southern Africa.** Casual sexual partnerships were defined as reporting at least one casual sexual partner in the past 12. Dates refer to the mid-points of the survey data collection period. Data from AIS are indicated in red. Data from different survey types are linked with dashed lines. Shaded areas indicate the years in which ART was introduced into the public healthcare sector in each country and from when 30% of adult PLWH (15+ years) were in treatment (disregarding treatment eligibility criteria; see Supporting Information, Section 2).

**Table S8:** Condomless casual sexual intercourse among everyone who had a casual sexual partner in the past 12 months, eastern and southern Africa.

| Country    | Survey      | (Phase) | Males   |                     |         | Females  |                     |         |
|------------|-------------|---------|---------|---------------------|---------|----------|---------------------|---------|
|            |             |         | Sample  | Adj. proportions    | Logit   | Sample   | Adj. proportions    | Logit   |
|            |             |         | n/N     | % (95% CI)          | p-value | n/N      | % (95% CI)          | p-value |
| Ethiopia   | DHS 2000    | (4)     | 15/30   | 42.92 (23.10-65.30) |         | 55/83    | 82.86 (65.57-92.47) |         |
|            | DHS 2005    | (4)     | 56/141  | 51.51 (38.04-64.77) | 0.2640  | 10/28    | 42.74 (19.34-69.91) | 0.0266  |
|            | DHS 2011    | (6)     | 85/345  | 18.01 (12.24-25.69) | <0.0001 | 21/82    | 39.59 (22.35-59.87) | 0.9319  |
|            | DHS 2016    | (7)     | 109/355 | 34.16 (26.04-43.33) | 0.0047  | 29/54    | 68.74 (48.69-83.60) | 0.0721  |
| Kenya      | DHS 2003    | (4)     | 92/219  | 42.91 (35.20-50.98) |         | 36/53    | 65.72 (48.18-79.81) |         |
|            | DHS 2008/09 | (5)     | 44/152  | 27.68 (19.99-36.96) | 0.0190  | 35/65    | 60.11 (46.11-72.64) | 0.6374  |
|            | DHS 2014    | (6)     | 166/738 | 20.81 (17.32-24.80) | 0.1943  | 55/146   | 30.98 (22.56-40.88) | 0.0014  |
| Lesotho    | DHS 2004    | (4)     | NA*     |                     |         | 23/42    | 55.74 (34.56-75.02) |         |
|            | DHS 2009    | (5)     | 108/256 | 38.09 (31.56-45.09) | <0.0001 | 73/136   | 46.41 (35.93-57.21) | 0.4310  |
|            | DHS 2014    | (6)     | 69/274  | 17.98 (13.36-23.76) | <0.0001 | 56/175   | 26.67 (20.16-34.38) | 0.0014  |
| Malawi     | DHS 2000    | (4)     | 95/178  | 54.70 (44.86-64.18) |         | 30/45    | 71.21 (55.09-83.30) |         |
|            | DHS 2004    | (4)     | 71/141  | 54.52 (44.89-63.82) | 0.9719  | 35/47    | 76.37 (59.68-87.59) | 0.6806  |
|            | DHS 2010    | (5)     | 77/210  | 37.70 (29.34-46.86) | 0.0104  | 24/43    | 50.93 (28.95-72.56) | 0.0876  |
|            | DHS 2015/16 | (7)     | 80/349  | 23.28 (18.37-29.03) | 0.0081  | 58/118   | 53.73 (40.05-66.88) | 0.9063  |
| Mozambique | DHS 2003    | (4)     | 260/375 | 76.22 (71.11-80.68) |         | 787/1002 | 80.98 (77.39-84.12) |         |
|            | AIS 2009    | (5)     | 224/469 | 57.18 (49.71-64.34) | <0.0001 | 95/144   | 72.11 (62.55-80.01) | 0.0681  |
|            | DHS 2011    | (6)     | 483/959 | 54.98 (51.19-58.72) | 0.5285  | 386/604  | 70.91 (66.62-74.86) | 0.6079  |
|            | AIS 2015    | (7)     | 321/758 | 50.62 (43.85-57.36) | 0.3096  | 198/334  | 62.51 (54.06-70.27) | 0.0710  |
| Namibia    | DHS 2000    | (4)     | 45/332  | 16.18 (11.61-22.10) |         | 17/60    | 35.17 (20.98-52.57) |         |
|            | DHS 2006/07 | (5)     | 92/512  | 16.58 (12.88-21.08) | 0.8933  | 23/76    | 30.96 (18.47-47.03) | 0.9607  |
|            | DHS 2013    | (6)     | 66/438  | 14.02 (10.67-18.20) | 0.4328  | 25/91    | 19.50 (12.29-29.51) | 0.0566  |
| Rwanda     | DHS 2000    | (4)     | 42/94   | 55.47 (42.77-67.48) |         | 58/66    | 90.20 (76.17-96.36) |         |
|            | DHS 2005    | (4)     | 49/91   | 55.84 (45.63-65.58) | 0.9826  | 34/40    | 86.46 (71.92-94.09) | 0.5565  |
|            | DHS 2010    | (6)     | 37/140  | 27.74 (20.63-36.17) | <0.0001 | 35/53    | 67.81 (54.73-78.59) | 0.0424  |
|            | DHS 2014/15 | (6)     | 43/121  | 35.84 (27.89-44.67) | 0.1585  | 31/62    | 52.79 (39.94-65.27) | 0.0864  |
| Tanzania   | AIS 2003/04 | (5)     | 430/889 | 46.05 (42.17-49.97) |         | 109/178  | 62.66 (54.66-70.02) |         |
|            | DHS 2004/05 | (4)     | 192/413 | 41.53 (35.45-47.88) | 0.1489  | 93/150   | 61.37 (51.10-70.73) | 0.8537  |
|            | AIS 2007/08 | (5)     | 262/525 | 49.28 (43.85-54.73) | 0.0229  | 66/117   | 54.93 (44.31-65.12) | 0.3680  |
|            | DHS 2010    | (5)     | 64/172  | 39.30 (30.43-48.94) | 0.0536  | 50/81    | 56.72 (44.69-68.00) | 0.8119  |
| Uganda     | AIS 2011/12 | (6)     | 243/603 | 39.52 (33.99-45.32) | 0.9197  | 62/129   | 51.56 (41.59-61.41) | 0.5364  |
|            | DHS 2000/01 | (4)     | 18/59   | 33.75 (22.76-46.83) |         | 19/31    | 67.84 (45.43-84.24) |         |
|            | DHS 2006    | (5)     | 57/154  | 36.35 (29.30-44.05) | 0.7149  | 46/78    | 56.66 (44.96-67.66) | 0.3933  |
|            | DHS 2011    | (6)     | 42/110  | 41.03 (30.89-52.00) | 0.4761  | 53/101   | 63.69 (50.77-74.89) | 0.3531  |
| Zambia     | DHS 2016    | (7)     | 174/413 | 40.92 (35.50-46.58) | 0.9798  | 158/250  | 63.52 (56.88-69.68) | 0.9902  |
|            | DHS 2001/02 | (4)     | 99/183  | 53.12 (44.70-61.37) |         | 27/42    | 62.50 (46.68-76.05) |         |
|            | DHS 2007    | (5)     | 146/342 | 42.18 (36.10-48.50) | 0.0419  | 33/53    | 61.06 (43.95-75.82) | 0.9224  |
| Zimbabwe   | DHS 2013/14 | (6)     | 235/498 | 44.47 (38.64-50.45) | 0.6867  | 33/66    | 48.20 (33.87-62.83) | 0.1368  |
|            | DHS 1999    | (4)     | 13/72   | 13.57 (7.77-22.62)  |         | 15/53    | 28.49 (16.89-43.84) |         |
|            | DHS 2005/06 | (5)     | 54/200  | 22.70 (16.78-29.96) | 0.1005  | 14/28    | 48.59 (29.30-68.30) | 0.1189  |
|            | DHS 2010/11 | (6)     | 39/240  | 13.23 (9.23-18.60)  | 0.0233  | 20/45    | 37.50 (23.36-54.15) | 0.3962  |
|            | DHS 2015    | (7)     | 46/390  | 11.52 (8.67-15.15)  | 0.5773  | 15/67    | 24.26 (14.16-38.34) | 0.1878  |

Sample sizes (n/N) refer to unadjusted numbers of people reporting condom use during the last casual sexual intercourse (n) among everyone who reported casual sexual intercourse in the past 12 months with data on this variable (N). Proportions (%) and 95% confidence intervals (95% CI) are adjusted for survey design and sampling weights. The p-values refer to the results from Pearson's chi-squared ( $\chi^2$ ) tests comparing the values for one survey with the previous one. These are also adjusted for survey design and sampling weights.

\* The Lesotho 2004 DHS only collected condom use information on females.

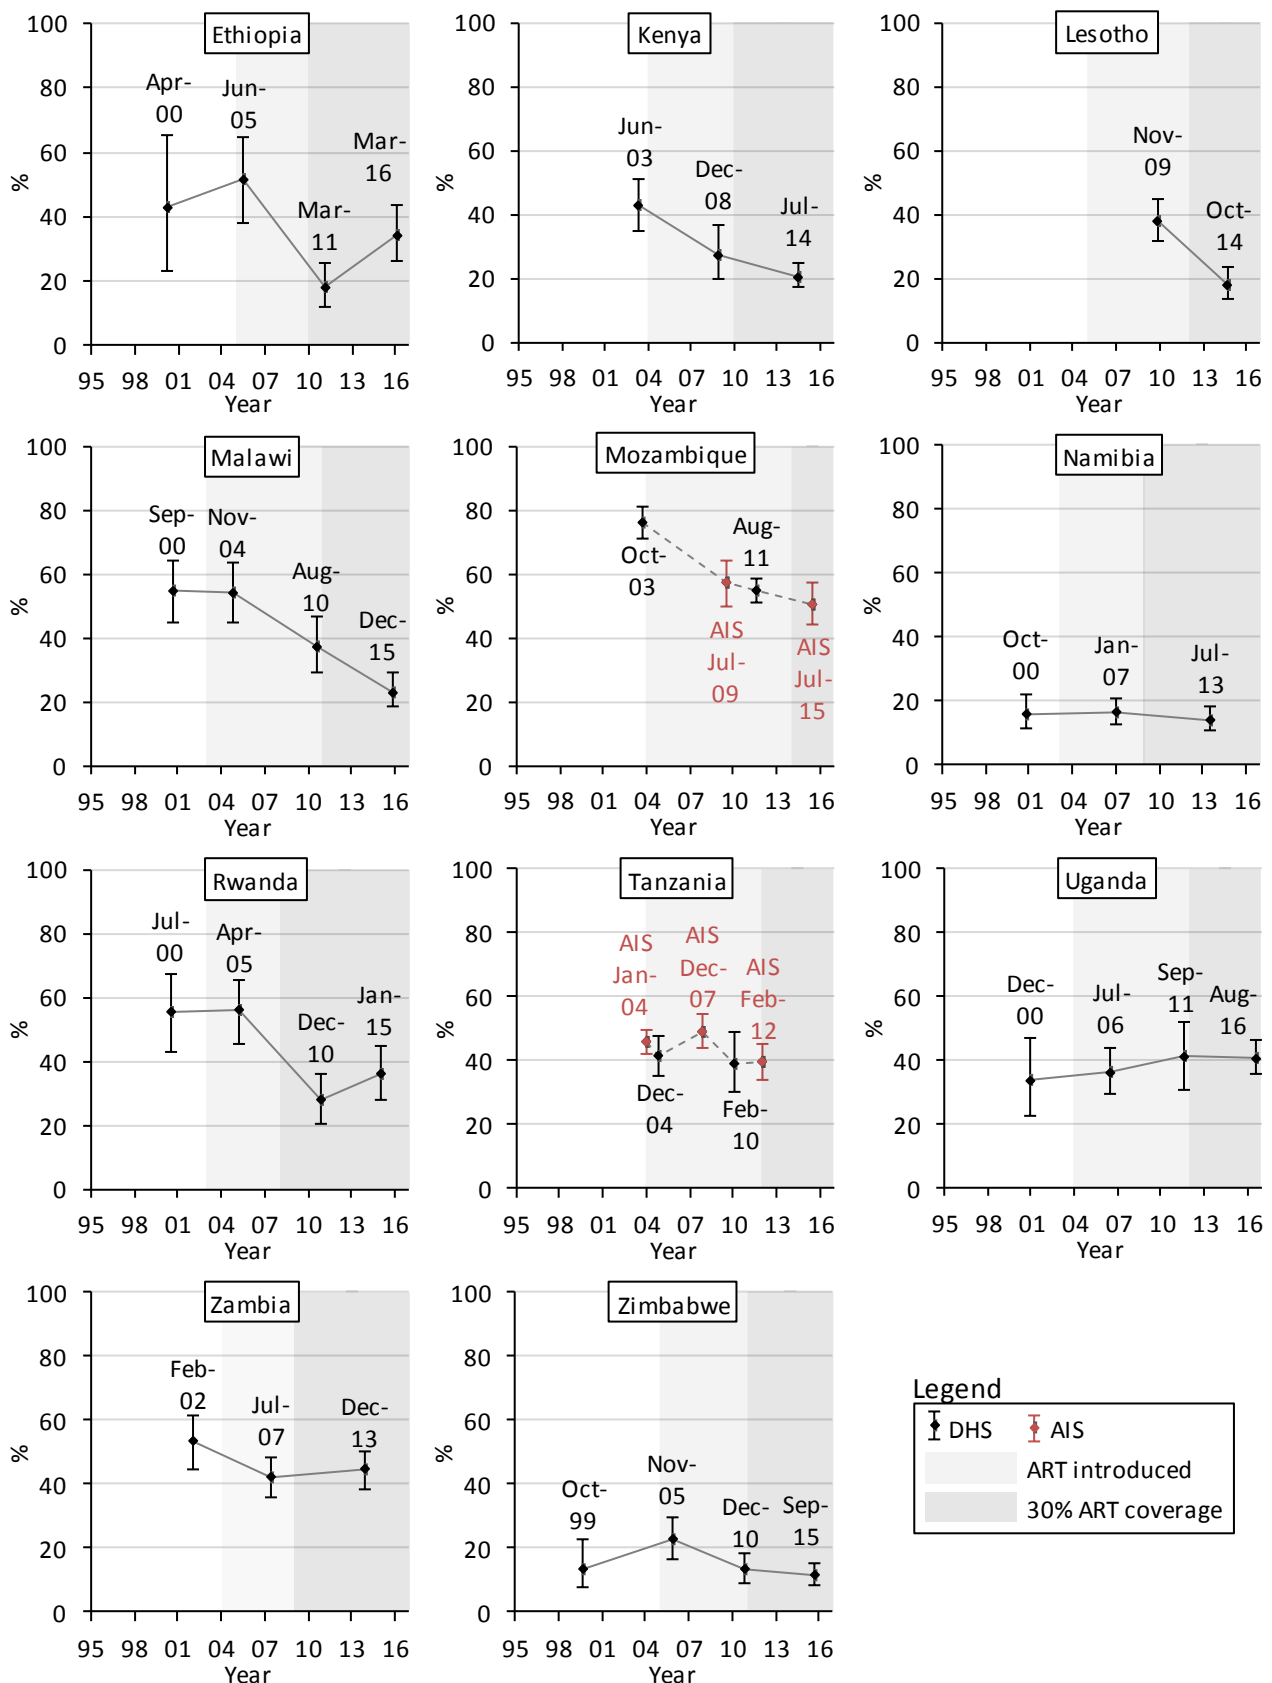

**Figure S2a. Trends in condomless sex with the last casual sexual partner among males (15-49 years), eastern and southern Africa.** The condom use refers to the last sexual intercourse in the past 12 months with a casual partner among everyone who had such a casual in the past 12 months. Dates refer to the mid-points of the survey data collection period. Data from AIS are indicated in red. Data from different survey types are linked with dashed lines. Shaded areas indicate the years in which ART was introduced into the public healthcare sector in each country and from when 30% of adult PLWH (15+ years) were in treatment (disregarding treatment eligibility criteria; see Supporting Information, Section 2).

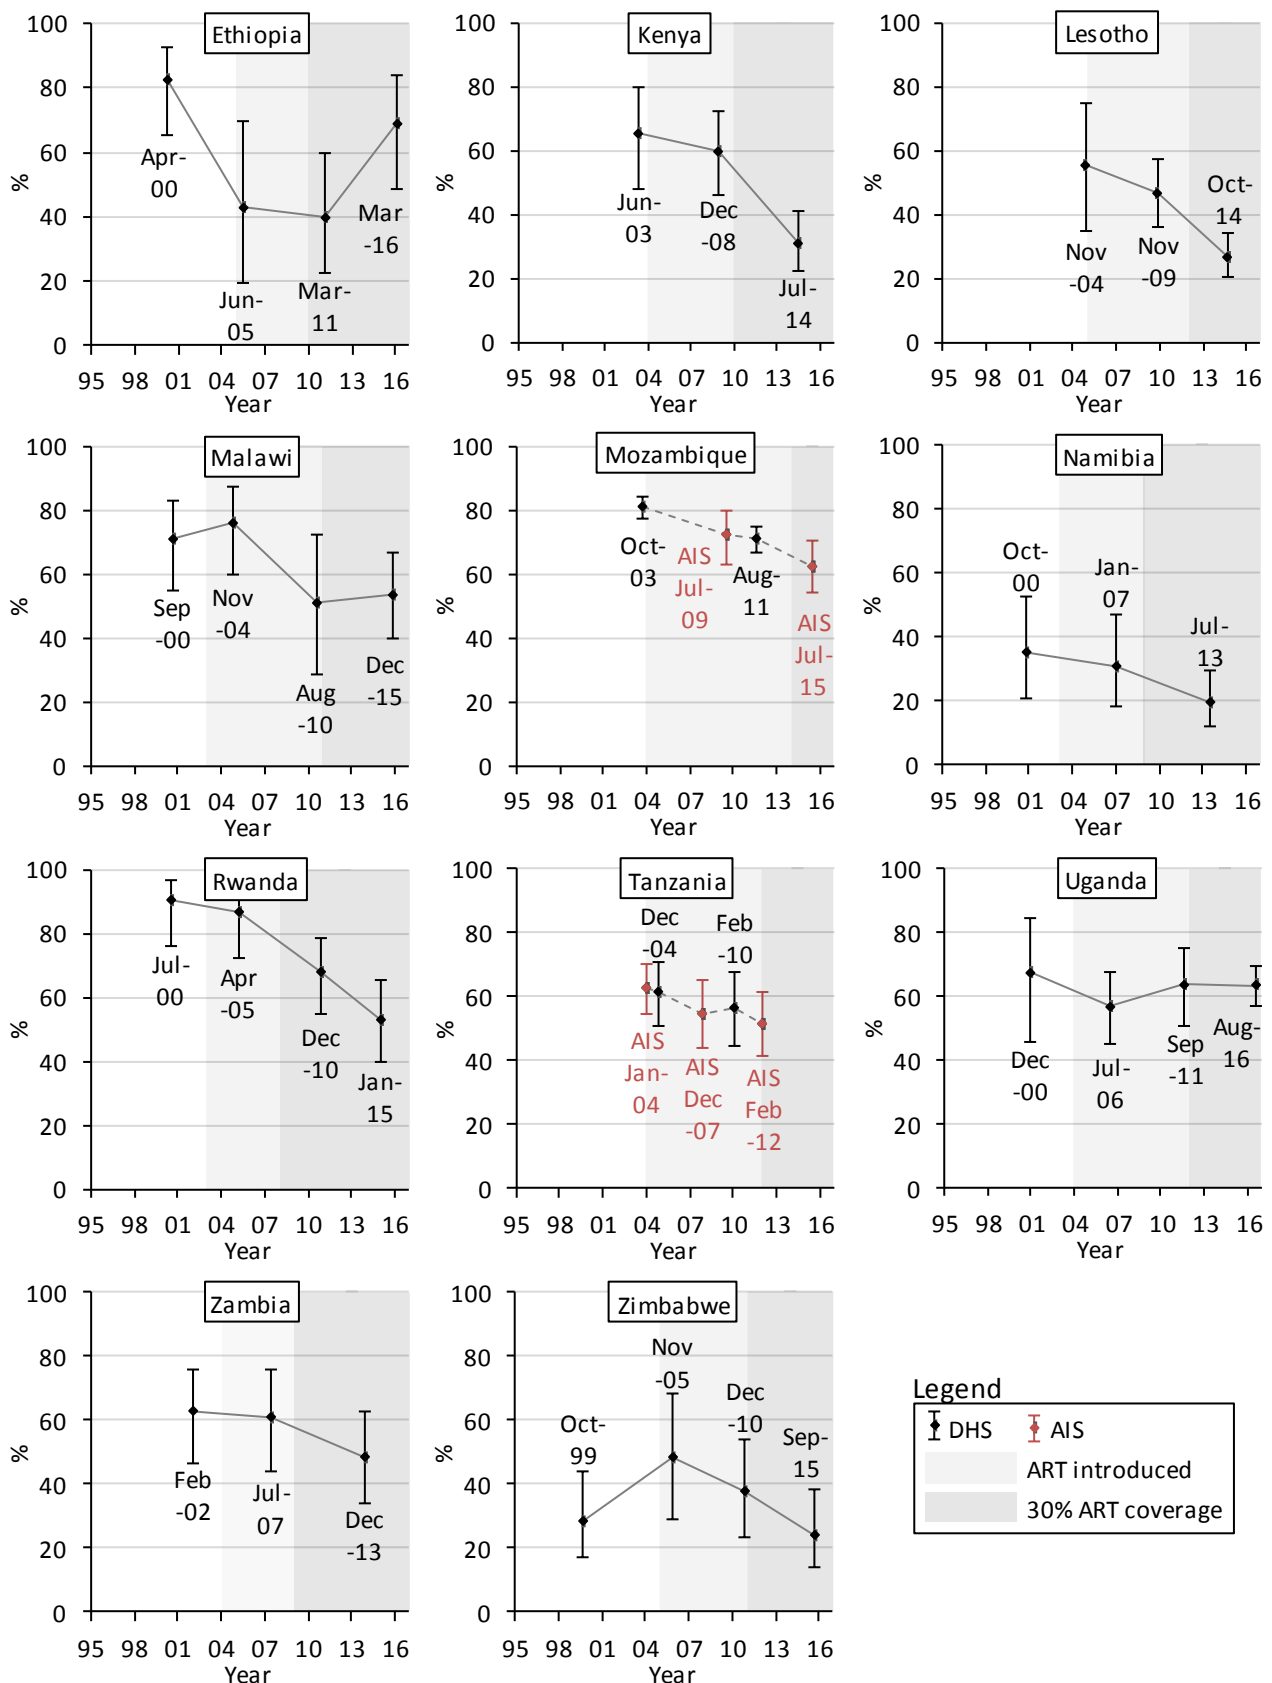

**Figure S2b. Trends in condomless sex with the last casual sexual partner among females (15-49 years), eastern and southern Africa.** The condom use refers to the last sexual intercourse in the past 12 months with a casual partner among everyone who had such a casual in the past 12 months. Dates refer to the mid-points of the survey data collection period. Data from AIS are indicated in red. Data from different survey types are linked with dashed lines. Shaded areas indicate the years in which ART was introduced into the public healthcare sector in each country and from when 30% of adult PLWH (15+ years) were in treatment (disregarding treatment eligibility criteria; see Supporting Information, Section 2).

**Table S9: Age at first sex before the age of 18 years, eastern and southern Africa.**

| Country    | Survey      | (Phase) | Males     |                     |         | Females    |                     |         |
|------------|-------------|---------|-----------|---------------------|---------|------------|---------------------|---------|
|            |             |         | Sample    | Adj. proportions    | Logit   | Sample     | Adj. proportions    | Logit   |
|            |             |         | n/N       | % (95% CI)          | p-value | n/N        | % (95% CI)          | p-value |
| Ethiopia   | DHS 2000    | (4)     | 192/560   | 32.65 (27.18-38.65) |         | 2802/4547  | 63.60 (60.98-66.13) |         |
|            | DHS 2005    | (4)     | 351/1203  | 25.28 (22.09-28.77) | 0.0155  | 2626/4127  | 66.79 (64.32-69.18) | 0.0807  |
|            | DHS 2011    | (6)     | 833/3045  | 24.53 (21.95-27.32) | 0.9626  | 2946/5150  | 59.43 (57.05-61.78) | <0.0001 |
|            | DHS 2016    | (7)     | 656/2717  | 21.70 (19.23-24.40) | 0.1734  | 2690/4762  | 57.94 (55.16-60.66) | 0.4181  |
| Kenya      | DHS 1998    | (3)     | 735/992   | 73.30 (69.75-76.56) |         | 1651/2676  | 63.43 (61.06-65.74) |         |
|            | DHS 2003    | (4)     | 657/1062  | 64.44 (61.22-67.52) | 0.0002  | 1462/2775  | 54.64 (52.02-57.23) | <0.0001 |
|            | DHS 2008/09 | (5)     | 635/1006  | 60.55 (55.50-65.39) | 0.1824  | 1519/2898  | 50.92 (47.49-54.34) | 0.0882  |
|            | DHS 2014    | (6)     | 2233/3572 | 63.39 (61.19-65.54) | 0.2217  | 5898/10622 | 51.18 (49.36-52.99) | 0.8040  |
| Lesotho    | DHS 2004    | (4)     | 392/789   | 49.45 (45.41-53.51) |         | 963/2297   | 40.78 (38.45-43.16) |         |
|            | DHS 2009    | (5)     | 619/1028  | 60.21 (56.65-63.67) | 0.0002  | 1230/2616  | 46.06 (43.70-48.45) | 0.0015  |
|            | DHS 2014    | (6)     | 547/872   | 62.79 (58.80-66.61) | 0.3173  | 1025/2277  | 43.50 (40.59-46.45) | 0.1771  |
| Malawi     | DHS 2000    | (4)     | 598/1081  | 52.41 (48.75-56.05) |         | 3421/5209  | 64.30 (62.37-66.20) |         |
|            | DHS 2004    | (4)     | 550/1127  | 46.90 (43.73-50.10) | 0.0551  | 2958/4820  | 58.38 (56.50-60.24) | <0.0001 |
|            | DHS 2010    | (5)     | 1057/2091 | 51.25 (48.34-54.14) | 0.0857  | 5306/8400  | 61.85 (60.22-63.45) | 0.0020  |
|            | DHS 2015/16 | (7)     | 1142/2246 | 49.89 (47.21-52.57) | 0.2791  | 5369/8718  | 61.15 (59.75-62.53) | 0.4096  |
| Mozambique | DHS 1997    | (3)     | 366/604   | 52.39 (45.86-58.83) |         | 2432/3198  | 80.25 (77.73-82.55) |         |
|            | DHS 2003    | (4)     | 532/795   | 66.28 (62.01-70.31) | 0.0005  | 3556/4609  | 78.81 (77.24-80.30) | 0.3399  |
|            | AIS 2009    | (5)     | 852/1359  | 62.28 (58.03-66.36) | 0.2043  | 1508/2072  | 74.18 (71.27-76.90) | 0.0027  |
|            | DHS 2011    | (6)     | 815/1181  | 68.37 (64.89-71.66) | 0.0338  | 3760/4775  | 79.10 (77.48-80.64) | 0.0020  |
|            | AIS 2015    | (7)     | 1066/1602 | 67.67 (64.55-70.64) | 0.7243  | 1786/2454  | 74.87 (72.51-77.09) | 0.0020  |
| Namibia    | DHS 2000    | (4)     | 608/954   | 64.31 (60.08-68.34) |         | 1044/2263  | 44.48 (41.26-47.75) |         |
|            | DHS 2006/07 | (5)     | 798/1335  | 60.65 (57.26-63.95) | 0.3125  | 1480/3180  | 44.92 (42.75-47.10) | 0.7207  |
|            | DHS 2013    | (6)     | 755/1301  | 57.44 (54.19-60.62) | 0.1323  | 1352/3041  | 40.92 (38.88-42.98) | 0.0051  |
| Rwanda     | DHS 2000    | (4)     | 202/627   | 33.88 (29.81-38.20) |         | 845/2738   | 31.92 (29.78-34.15) |         |
|            | DHS 2005    | (4)     | 412/1113  | 36.70 (33.55-39.95) | 0.4745  | 882/2933   | 29.70 (27.99-31.47) | 0.1697  |
|            | DHS 2010    | (6)     | 474/1616  | 29.82 (27.45-32.31) | 0.0186  | 876/3714   | 23.70 (22.25-25.22) | <0.0001 |
|            | DHS 2014/15 | (6)     | 376/1414  | 26.39 (23.89-29.04) | 0.0811  | 798/3603   | 22.05 (20.60-23.57) | 0.0664  |
| Tanzania   | DHS 1996    | (3)     | 364/604   | 58.63 (54.25-62.88) |         | 1836/2927  | 62.81 (60.16-65.39) |         |
|            | DHS 1999    | (3)     | 530/957   | 58.58 (53.20-63.76) | 0.9093  | 930/1425   | 68.38 (64.23-72.26) | 0.0248  |
|            | AIS 2003/04 | (5)     | 754/1748  | 43.61 (40.88-46.38) | <0.0001 | 1467/2531  | 57.30 (54.88-59.69) | <0.0001 |
|            | DHS 2004/05 | (4)     | 344/748   | 48.26 (44.00-52.55) | 0.0942  | 2140/3467  | 64.29 (61.99-66.52) | <0.0001 |
|            | AIS 2007/08 | (5)     | 713/1655  | 46.66 (43.61-49.73) | 0.5704  | 1646/2860  | 60.15 (57.74-62.52) | 0.0122  |
|            | DHS 2010    | (5)     | 281/621   | 47.93 (43.37-52.53) | 0.6494  | 1792/3099  | 61.51 (59.11-63.87) | 0.4229  |
|            | AIS 2011/12 | (6)     | 928/2247  | 44.31 (41.58-47.08) | 0.1659  | 1802/3428  | 53.11 (50.43-55.77) | <0.0001 |
|            | DHS 2015/16 | (7)     | 474/995   | 49.87 (46.17-53.56) | 0.0156  | 2469/4202  | 60.62 (58.55-62.65) | <0.0001 |
| Uganda     | DHS 1995    | (3)     | 444/715   | 60.62 (56.77-64.34) |         | 2040/2803  | 73.86 (71.63-75.98) |         |
|            | DHS 2000/01 | (4)     | 230/602   | 38.98 (34.72-43.41) | <0.0001 | 1857/2783  | 68.58 (66.36-70.73) | 0.0010  |
|            | DHS 2006    | (5)     | 355/681   | 51.85 (47.56-56.12) | 0.0001  | 1977/2921  | 68.87 (66.67-70.99) | 0.8223  |
|            | DHS 2011    | (6)     | 279/639   | 43.86 (39.33-48.49) | 0.0210  | 1859/3101  | 62.74 (60.52-64.91) | 0.0001  |
|            | DHS 2016    | (7)     | 804/1561  | 50.90 (47.93-53.86) | 0.0316  | 3973/6474  | 60.01 (58.27-61.72) | 0.0504  |
| Zambia     | DHS 1996    | (3)     | 465/607   | 75.30 (71.02-79.14) |         | 2222/3008  | 71.71 (69.72-73.61) |         |
|            | DHS 2001/02 | (4)     | 418/665   | 61.20 (56.52-65.68) | <0.0001 | 1959/2895  | 65.65 (63.45-67.78) | 0.0001  |
|            | DHS 2007    | (5)     | 1094/1894 | 55.54 (52.70-58.35) | 0.0351  | 1679/2659  | 61.96 (59.38-64.47) | 0.0400  |
|            | DHS 2013/14 | (6)     | 2081/3900 | 50.96 (48.91-53.01) | 0.0062  | 3275/5498  | 58.95 (57.13-60.75) | 0.0537  |
| Zimbabwe   | DHS 1994    | (3)     | 263/621   | 39.90 (35.40-44.57) |         | 947/1945   | 46.43 (43.71-49.16) |         |
|            | DHS 1999    | (4)     | 289/761   | 35.65 (31.41-40.13) | 0.2607  | 832/2053   | 37.98 (35.36-40.67) | <0.0001 |
|            | DHS 2005/06 | (5)     | 662/2070  | 30.86 (28.61-33.20) | 0.0308  | 1295/3008  | 42.18 (40.10-44.28) | 0.0147  |
|            | DHS 2010/11 | (6)     | 592/2098  | 26.94 (24.91-29.07) | 0.0409  | 1330/3188  | 40.25 (38.26-42.27) | 0.2621  |
|            | DHS 2015    | (7)     | 705/2200  | 31.31 (28.87-33.85) | 0.0132  | 1353/3107  | 45.27 (42.89-47.67) | 0.0009  |

Sample sizes (n/N) refer to unadjusted numbers of people reporting an age at first sex before the age of 18 years (n) among everyone who reported sexual intercourse before with data on this variable and who were aged 20-29 years (N). Proportions (%) and 95% confidence intervals (95% CI) are adjusted for survey design and sampling weights. The p-values refer to results from logistic regressions with odds ratios of age at first sex before 18 years calculated for one survey compared with the preceding one, adjusted for age. These are also adjusted for survey design and sampling weights.

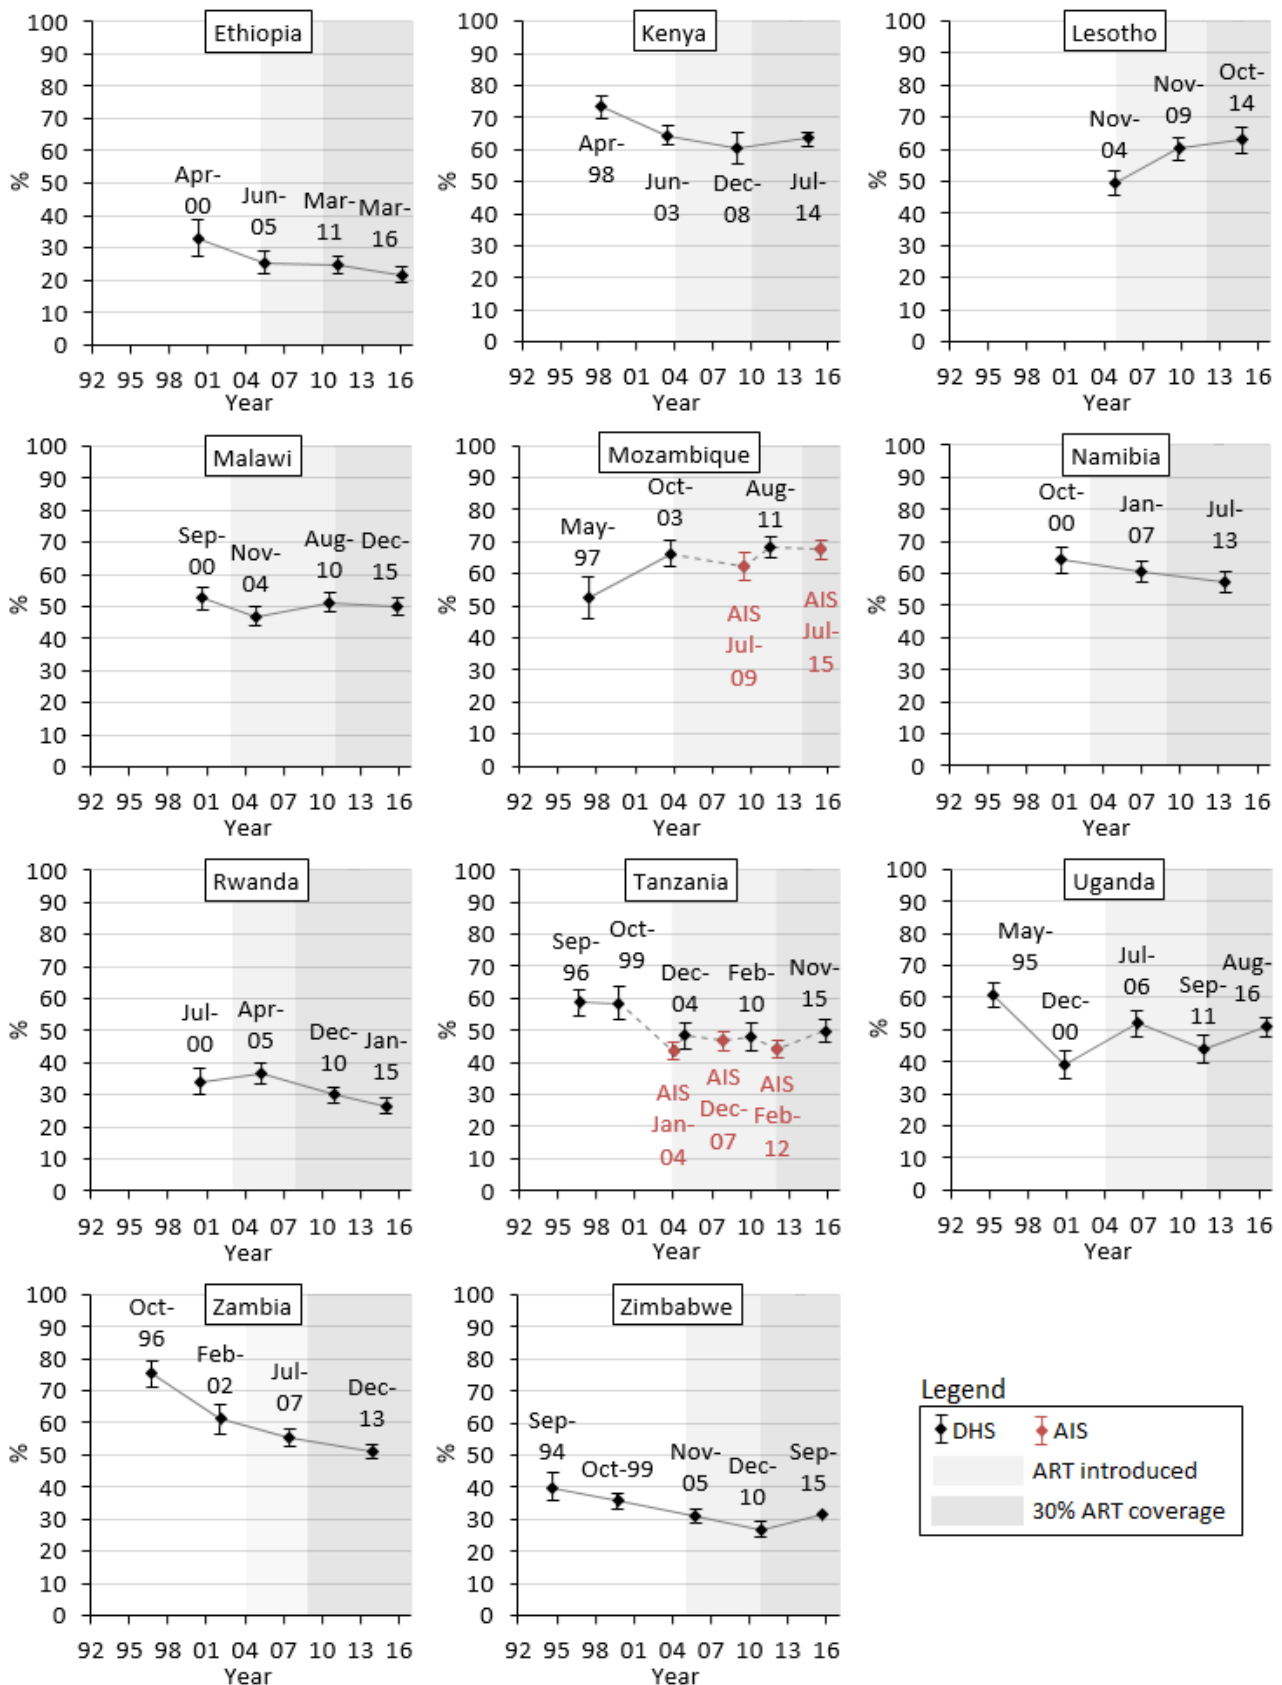

**Figure S3a. Trends in age at first sex before the age of 18 years among males (20-29 years), eastern and southern Africa.** The sample included males aged 20-29 years who reported ever having had sexual intercourse. Dates refer to the mid-points of the survey data collection period. Data from AIS are indicated in red. Data from different survey types are linked with dashed lines. Shaded areas indicate the years in which ART was introduced into the public healthcare sector in each country and from when 30% of adult PLWH (15+ years) were in treatment (disregarding treatment eligibility criteria; see Supporting Information, Section 2).



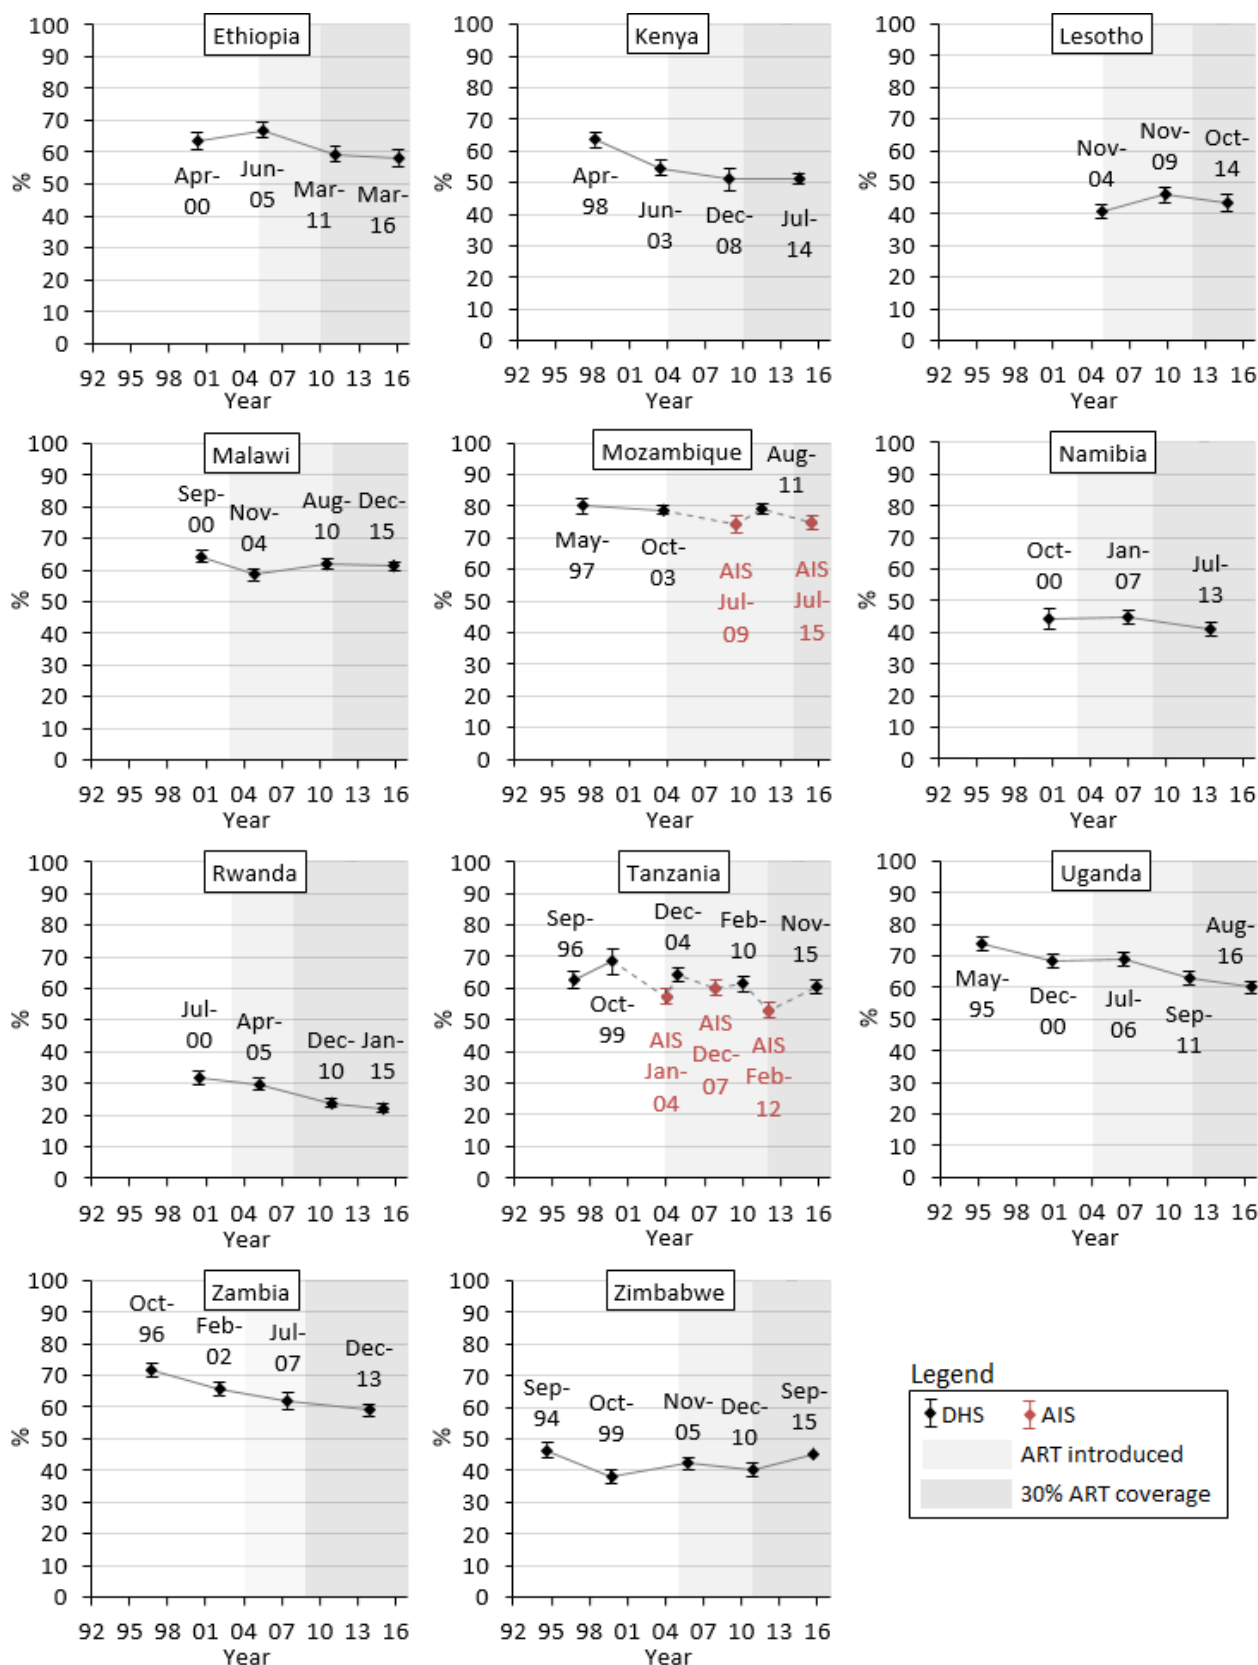

**Figure S3b. Trends in age at first sex before the age of 18 years among females (20-29 years), eastern and southern Africa.** The sample included females aged 20-29 years who reported ever having had sexual intercourse. Dates refer to the mid-points of the survey data collection period. Data from AIS are indicated in red. Data from different survey types are linked with dashed lines. Shaded areas indicate the years in which ART was introduced into the public healthcare sector in each country and from when 30% of adult PLWH (15+ years) were in treatment (disregarding treatment eligibility criteria; see Supporting Information, Section 2).

## 5. Analysis by HIV status

Five countries had at least three surveys with HIV status data available (Lesotho, Malawi, Rwanda, Tanzania, and Zimbabwe) (Table S1), which allows for comparing trends in risky sexual behaviour over time between those HIV-negative and HIV-positive. This HIV status was determined at the time of the survey and does not necessarily mean that participants are aware of their status. Particularly in earlier surveys, the proportion of participants who have ever done an HIV test is likely to have been low.

Only multiple sexual partnerships, non-regular partnerships, and condom use during last non-regular partnership are considered here. Figures S4-6 show trends in these behaviours over time by sex and HIV status. To formally test whether there are differences in trends by HIV status, logistic regression models were estimated with the sexual behaviour as the outcome and age, survey, HIV status, and an interaction term between the survey and HIV status as independent variables. Regressions included a survey variable covering all surveys for a country (not just consecutive surveys as in previous regressions). Regressions are estimated separately by sex. Results are presented in Table S10.

As can be seen from the figures and the interaction terms, trends for those HIV-positive and HIV-negative tend to be similar. Levels of multiple partnerships tended to be higher among those HIV-positive (Figure S4a-b). Only In Tanzania there is a markedly different trend between those HIV-positive and HIV-negative, although this interaction is not significant (Table S10). For non-regular partnerships, levels among those HIV-negative tend to be higher among males but lower among females (Figure S5a-b), while trends are generally similar (with the exceptions of Zimbabwe among males and Lesotho among females). For condom use with the last non-regular partner, significant interactions are indicated for Lesotho (males) and Zimbabwe (females) (Table S10). However, the direction of the trend is the same; only the magnitude of increase varies by HIV status.

**Table S10:** Interaction of sexual risk behaviour and HIV status, eastern and southern Africa.

| Country  | Interaction            | Males                        |                                 |                                            | Females                      |                                 |                                            |
|----------|------------------------|------------------------------|---------------------------------|--------------------------------------------|------------------------------|---------------------------------|--------------------------------------------|
|          |                        | Multiple partners<br>p-value | Non-regular partners<br>p-value | Condom use non-regular partners<br>p-value | Multiple partners<br>p-value | Non-regular partners<br>p-value | Condom use non-regular partners<br>p-value |
| Lesotho  | DHS 2004#HIV status    |                              |                                 |                                            |                              |                                 |                                            |
|          | DHS 2009#HIV status    | 0.4961                       | 0.5222                          |                                            | 0.8643                       | 0.1478                          | 0.4014                                     |
|          | DHS 2014#HIV status    | 0.7053                       | 0.5545                          | 0.0432                                     | 0.4989                       | 0.9264                          | 0.9617                                     |
|          | Overall interaction    | 0.5135                       | 0.7810                          | 0.0432                                     | 0.6780                       | 0.2210                          | 0.6087                                     |
| Malawi   | DHS 2004#HIV status    |                              |                                 |                                            |                              |                                 |                                            |
|          | DHS 2010#HIV status    | 0.6654                       | 0.7215                          | 0.9356                                     | 0.5970                       | 0.5879                          | 0.4014                                     |
|          | DHS 2015/16#HIV status | 0.5037                       | 0.8991                          | 0.1851                                     | 0.4241                       | 0.6119                          | 0.9617                                     |
|          | Overall interaction    | 0.7996                       | 0.8615                          | 0.2344                                     | 0.7249                       | 0.8439                          | 0.0885                                     |
| Rwanda   | DHS 2005#HIV status    |                              |                                 |                                            |                              |                                 |                                            |
|          | DHS 2010#HIV status    | 0.2293                       | 0.3055                          | 0.3408                                     | 0.5044                       | 0.5879                          | 0.4014                                     |
|          | DHS 2014/15#HIV status | 0.5893                       | 0.6481                          | 0.1011                                     | 0.5970                       | 0.6119                          | 0.9617                                     |
|          | Overall interaction    | 0.4363                       | 0.5892                          | 0.2606                                     | 0.2314                       | 0.7608                          | 0.6970                                     |
| Tanzania | AIS 2003/04#HIV status |                              |                                 |                                            |                              |                                 |                                            |
|          | AIS 2007/08#HIV status | 0.0910                       | 0.7654                          | 0.0539                                     | 0.9591                       | 0.5879                          | 0.4014                                     |
|          | AIS 2011/12#HIV status | 0.5068                       | 0.8558                          | 0.2434                                     | 0.3686                       | 0.6119                          | 0.9617                                     |
|          | Overall interaction    | 0.2399                       | 0.9532                          | 0.1424                                     | 0.6123                       | 0.2710                          | 0.2755                                     |
| Zimbabwe | DHS 2005/06#HIV status |                              |                                 |                                            |                              |                                 |                                            |
|          | DHS 2010/11#HIV status | 0.2291                       | 0.0198                          | 0.5013                                     | 0.5287                       | 0.5879                          | 0.4014                                     |
|          | DHS 2015#HIV status    | 0.2217                       | 0.0787                          | 0.4024                                     | 0.2954                       | 0.6119                          | 0.9617                                     |
|          | Overall interaction    | 0.3993                       | 0.0581                          | 0.6756                                     | 0.5753                       | 0.5688                          | 0.0214                                     |

For each country and by sex, a logistic regression was estimated with one sexual behaviour variable as the outcome and age, the survey, HIV status, and an interaction term between survey and HIV status as independent variables. The p-values refer to the individual interactions of the surveys and the interaction as a whole. Samples included everyone who reported sexual activity in the past 12 months. Regressions adjusted for survey design and sampling weights.

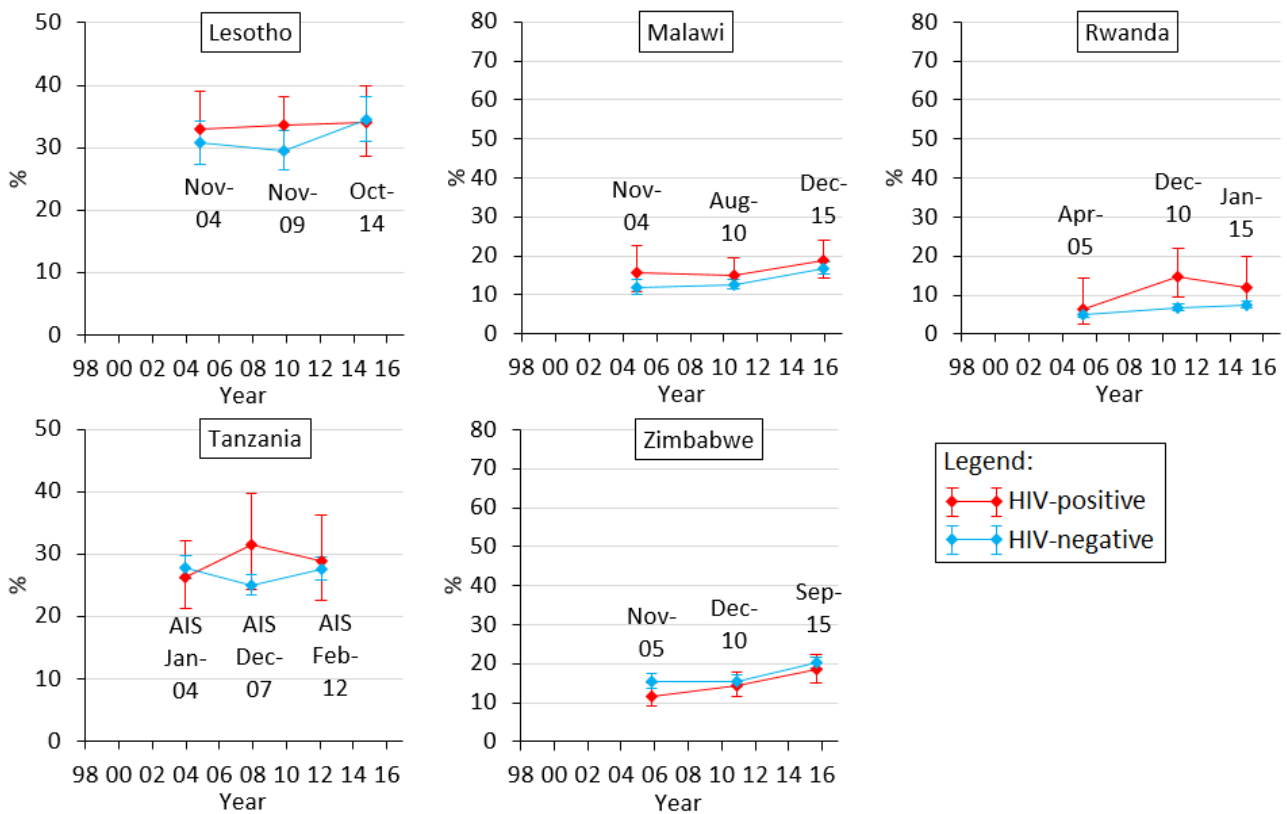

**Figure S4a. Trends in multiple sexual partnerships among males (15-49 years) by HIV status, eastern and southern Africa.** Multiple sexual partnerships were defined as reporting more than one sexual partner in the past 12 months. Dates refer to the mid-points of the survey data collection period.

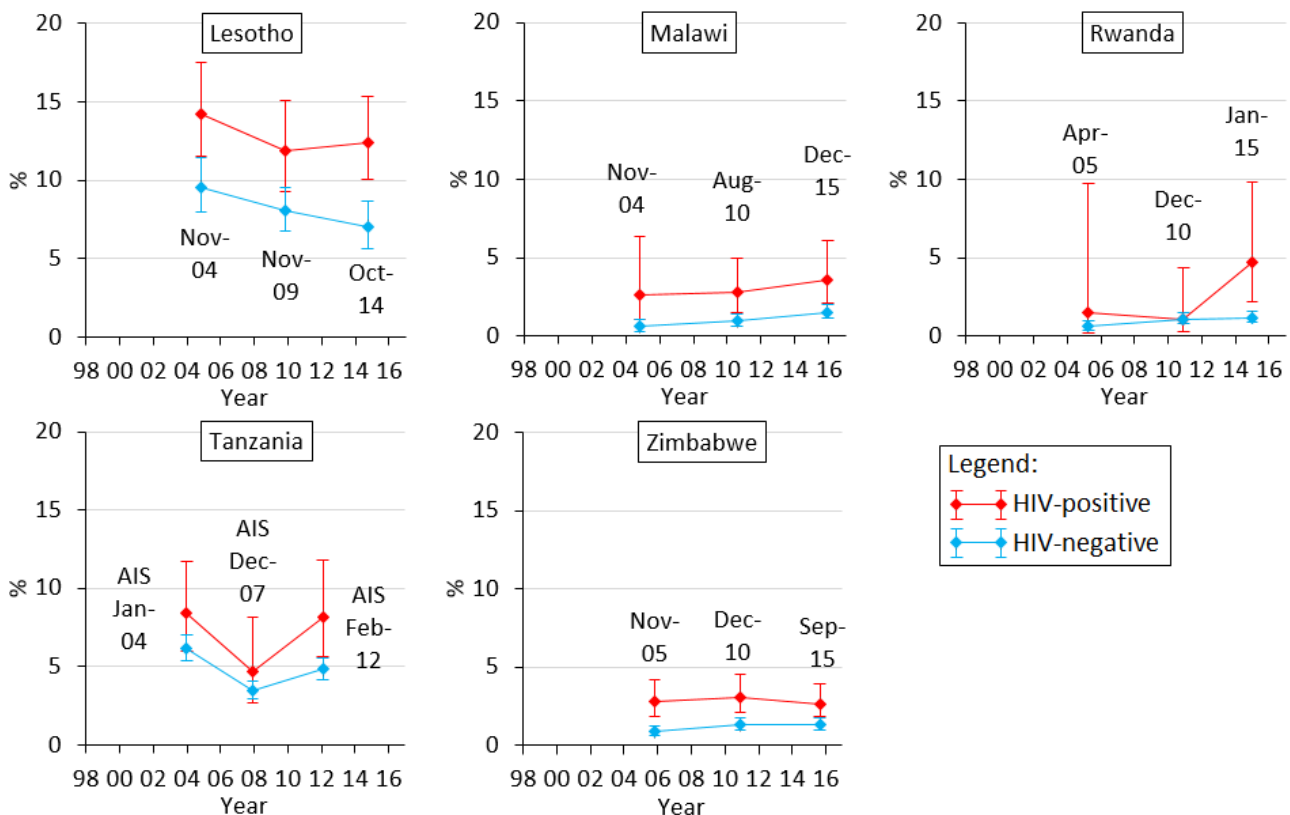

**Figure S4b. Trends in multiple sexual partnerships among females (15-49 years) by HIV status, eastern and southern Africa.** Multiple sexual partnerships were defined as reporting more than one sexual partner in the past 12 months. Dates refer to the mid-points of the survey data collection period.

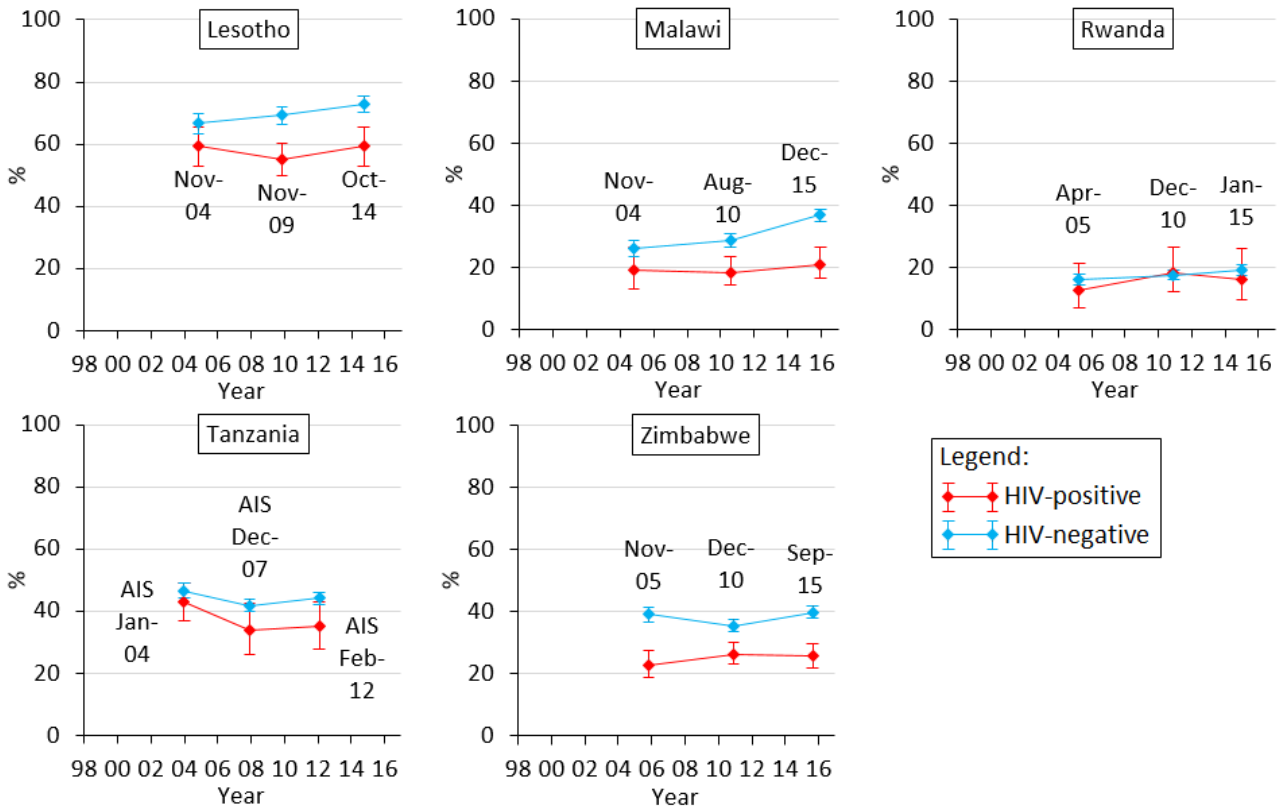

**Figure S5a. Trends in non-regular sexual partnerships among males (15-49 years) by HIV status, eastern and southern Africa.** Non-regular sexual partnerships were defined as reporting at least one sexual partner in the past 12 months who the participant was not married to and did not live with. Dates refer to the mid-points of the survey data collection period.

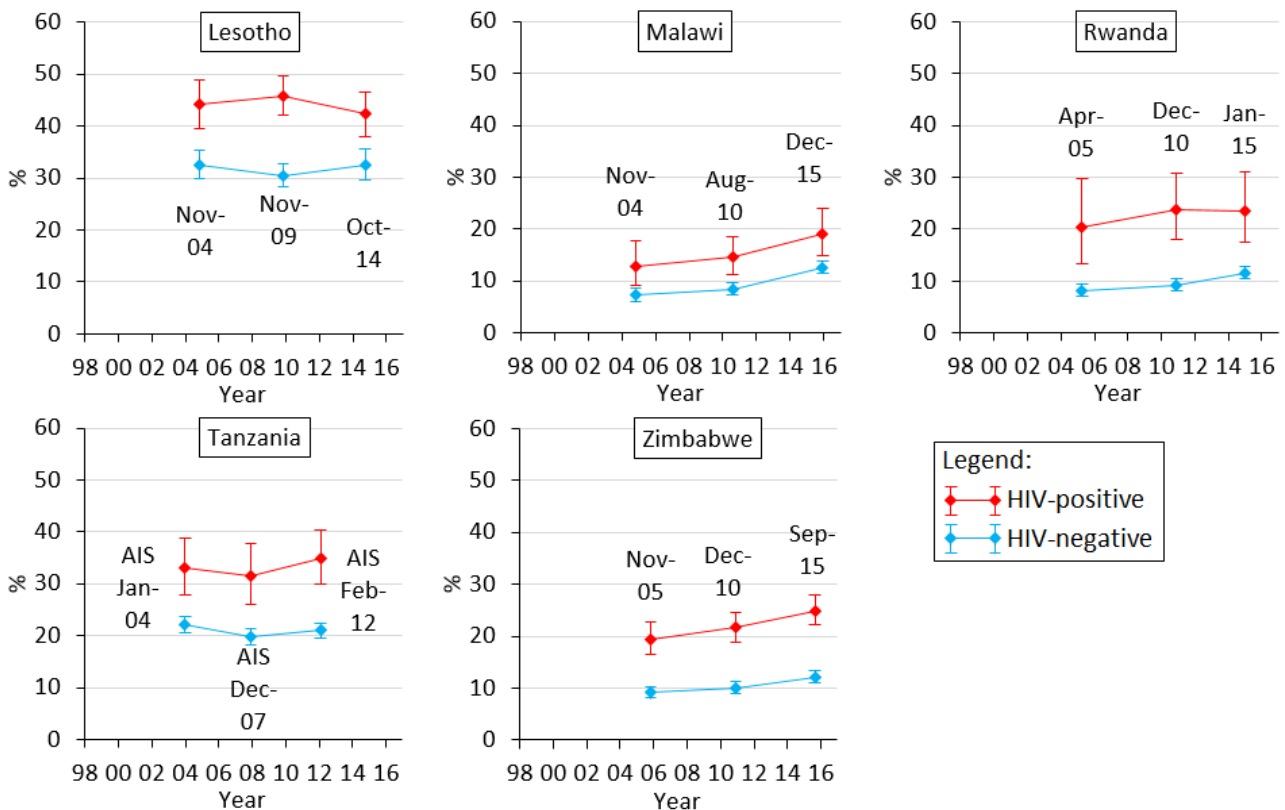

**Figure S5b. Trends in non-regular sexual partnerships among females (15-49 years) by HIV status, eastern and southern Africa.** Non-regular sexual partnerships were defined as reporting at least one sexual partner in the past 12 months who the participant was not married to and did not live with. Dates refer to the mid-points of the survey data collection period.

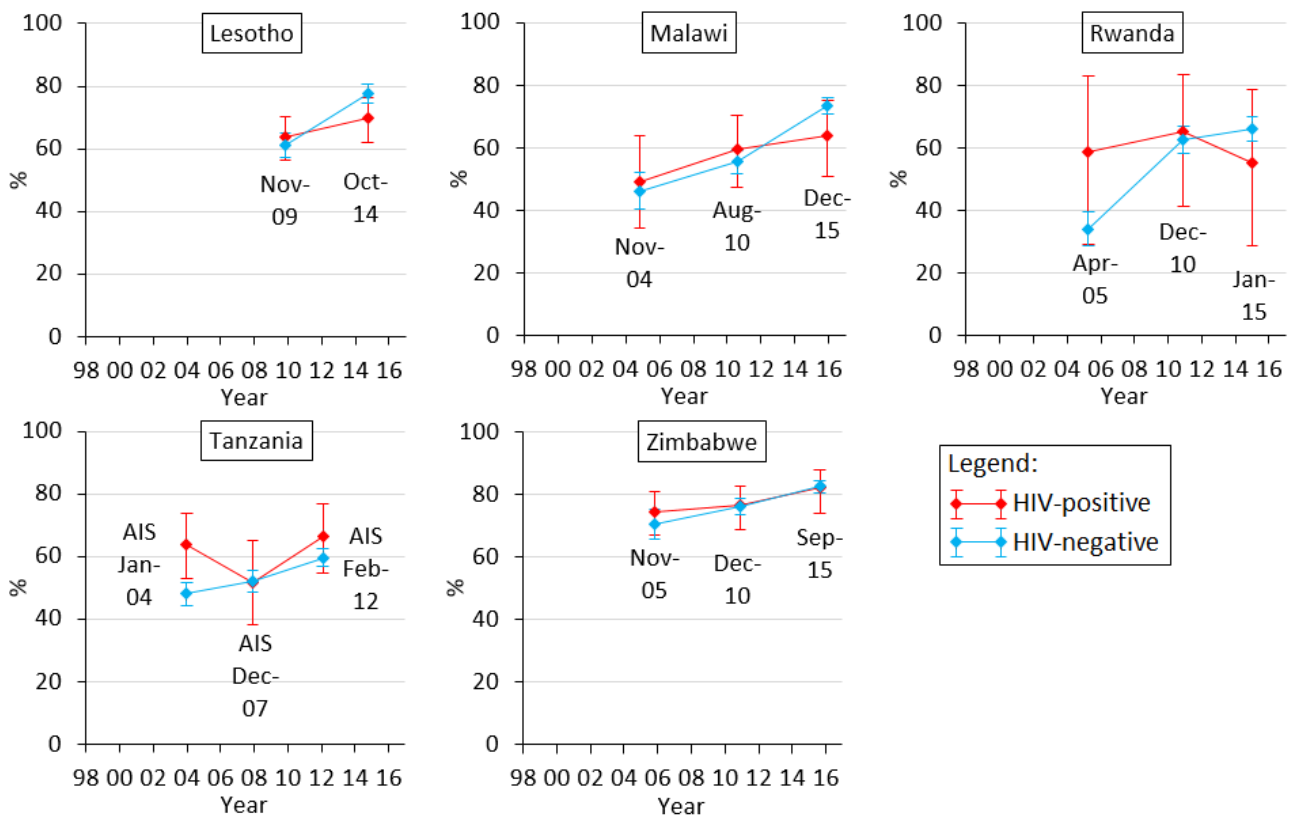

**Figure S6a. Trends in condom use with the last non-regular sexual partners among males (15-49 years) by HIV status, eastern and southern Africa.** The condom use refers to the last sexual intercourse in the past 12 months with a partner who the participant was not married to and did not live with among everyone who had such a non-regular partner in the past 12 months. Dates refer to the mid-points of the survey data collection period.

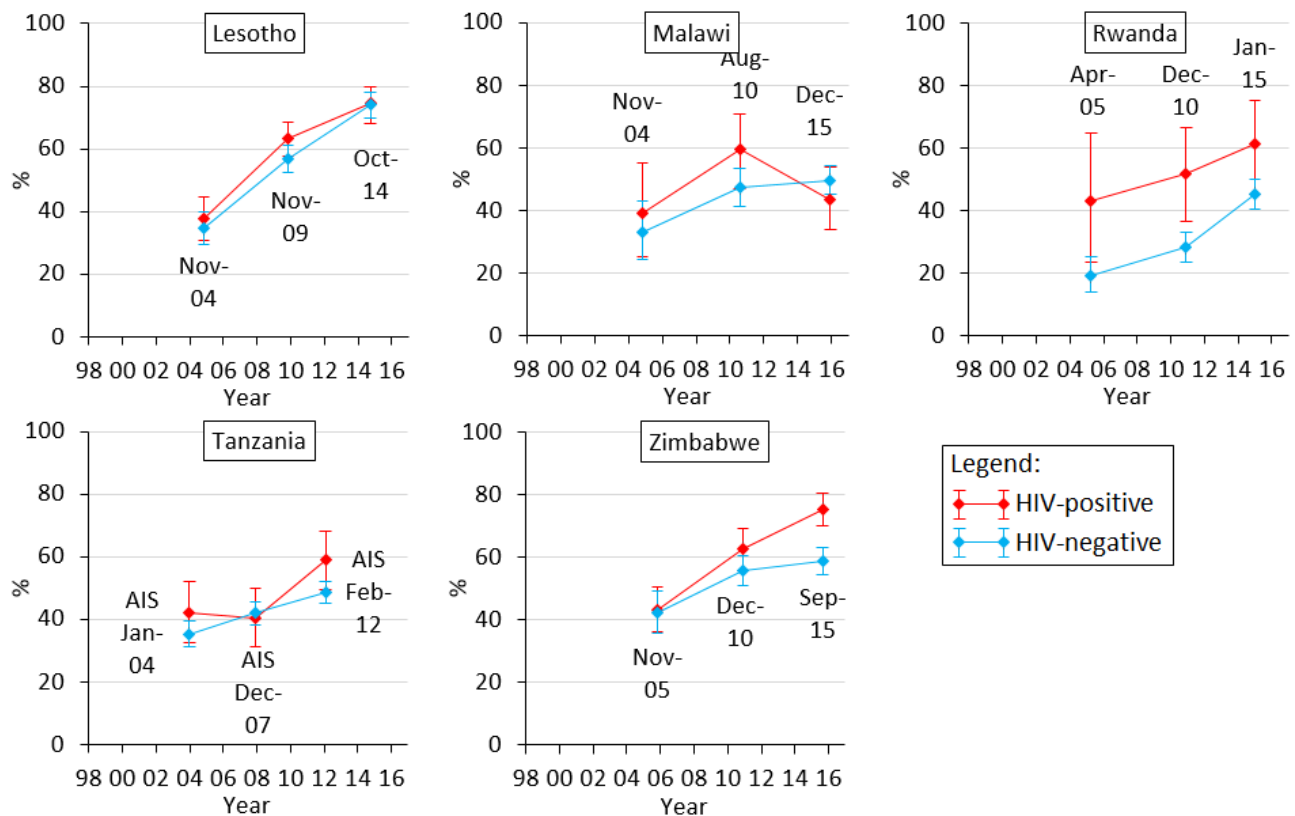

**Figure S6b. Trends in condom use with the last non-regular sexual partners among females (15-49 years) by HIV status, eastern and southern Africa.** The condom use refers to the last sexual intercourse in the past 12 months with a partner who the participant was not married to and did not live with among everyone who had such a non-regular partner in the past 12 months. Dates refer to the mid-points of the survey data collection period.

## 6. Sensitivity analysis: Including non-sexually active individuals

The analyses presented in the main article and other analyses in this supplementary material were restricted to those who ever had sex (and further those reporting sexual activity in the past 12 months). Conclusions drawn from these analyses regarding trends in the sexual behaviour may be biased if there are changes in levels of sexual activity in the population. For example, if the proportion of those who ever had sex declines over time then there may be declines in population levels of multiple sexual partnerships in the population, even if there are increases in multiple sexual partnerships among those who are sexually active.

Table S11 and Figure S7a-b presents trends in reporting of having had sex before. The trends in sexual activity reflect, to a large degree, the trends in age of sexual debut presented in Figures S4a-b. Particularly in earlier surveys among males (Figure S7a), there were declines in the proportion of those reporting sexual debut, often correlating with decreasing proportions reporting an age of first sex before the age of 18 (Figure S3a), while trends among females were less pronounced (Figure S7b). Generally, changes in tended to be small in absolute terms. More importantly, decreases in the proportion reporting sexual debut tended not to occur between later surveys (exceptions are Malawi, and Namibia for males). This means it is unlikely that the conclusions drawn from the main analyses of recent increases in risky sexual behaviour are invalid due to overall decreases in sexual activity in recent surveys.

To test formally whether conclusions are impacted by the selected sample, a sensitivity analysis was conducted to estimate the proportions and statistical differences over time for the three primary indicators of the main analysis (multiple, non-regular, and casual partnerships) including those who have not had sex before and who have not had sex in the past 12 months (who were recorded as not reporting multiple, non-regular, or casual partnerships). Moreover, proportions of those aged 20-29 reporting an age at first sex before the age of 18 were estimated in this sample including those who not had their sexual debut as estimates in this sample may be particularly sensitive to changes in the proportion of those sexually active. The results are presented in Table S12 (multiple partnerships), S13 (non-regular partnerships), S14 (casual partnerships), and S15 (age at first sex). Generally, there is limited indication that the conclusions drawn in the main analysis were biased by restricting the sample to those sexually active. The same trends appear in the sample including those not sexually active and similar statistical differences between surveys within countries tended to be found in this sample. There were few instances in which a difference between surveys was statistically significant in the sample that excludes those who have not had sex compared to the sample that included these (and vice versa). We therefore concluded that no bias was introduced when analysing the sample excluding those who have not had sex before, which is better suited to represent trends in sexual behaviour.

**Table S11: Having ever had sex, eastern and southern Africa.**

| Country    | Survey      | (Phase) | Males       |                     |         | Females     |                     |         |
|------------|-------------|---------|-------------|---------------------|---------|-------------|---------------------|---------|
|            |             |         | Sample      | Adj. proportions    | Logit   | Sample      | Adj. proportions    | Logit   |
|            |             |         | n/N         | % (95% CI)          | p-value | n/N         | % (95% CI)          | p-value |
| Ethiopia   | DHS 2000    | (4)     | 1619/2336   | 67.15 (64.17-69.99) | 0.0000  | 11787/15356 | 77.17 (75.61-78.66) | 0.0000  |
|            | DHS 2005    | (4)     | 3625/5468   | 63.12 (61.29-64.92) | 0.0013  | 10609/14056 | 76.36 (74.98-77.69) | 0.1500  |
|            | DHS 2011    | (6)     | 8682/12858  | 64.14 (62.51-65.75) | 0.9121  | 12541/16498 | 74.73 (73.39-76.03) | 0.1678  |
|            | DHS 2016    | (7)     | 7965/11578  | 66.94 (65.43-68.41) | 0.9189  | 11962/15683 | 76.73 (75.30-78.10) | 0.7805  |
| Kenya      | DHS 1998    | (3)     | 2775/3198   | 86.32 (84.84-87.67) | 0.0000  | 6591/7860   | 84.20 (83.09-85.25) | 0.0000  |
|            | DHS 2003    | (4)     | 2766/3337   | 83.97 (82.34-85.48) | 0.0238  | 6778/8176   | 83.01 (81.87-84.10) | 0.0100  |
|            | DHS 2008/09 | (5)     | 2718/3256   | 83.77 (81.84-85.52) | 0.0793  | 7031/8438   | 83.29 (81.91-84.59) | 0.3853  |
|            | DHS 2014    | (6)     | 9921/12002  | 84.77 (83.85-85.64) | 0.5363  | 26420/31038 | 85.70 (85.06-86.32) | 0.1620  |
| Lesotho    | DHS 2004    | (4)     | 1995/2488   | 79.72 (77.84-81.47) | 0.0000  | 5879/7082   | 83.36 (82.21-84.45) | 0.0000  |
|            | DHS 2009    | (5)     | 2572/2988   | 86.40 (84.89-87.77) | 0.0000  | 6508/7624   | 85.27 (84.17-86.29) | 0.0064  |
|            | DHS 2014    | (6)     | 2284/2626   | 87.03 (85.22-88.66) | 0.9807  | 5689/6621   | 86.49 (85.45-87.46) | 0.4157  |
| Malawi     | DHS 2000    | (4)     | 2603/2911   | 89.48 (87.58-91.12) | 0.0000  | 11839/13211 | 89.59 (88.83-90.30) | 0.0000  |
|            | DHS 2004    | (4)     | 2712/3079   | 87.18 (85.33-88.83) | 0.0008  | 10445/11675 | 88.86 (88.06-89.61) | 0.0015  |
|            | DHS 2010    | (5)     | 5785/6794   | 85.33 (84.11-86.47) | 0.4193  | 19855/22995 | 86.42 (85.79-87.03) | 0.0004  |
|            | DHS 2015/16 | (7)     | 6053/7138   | 85.72 (84.68-86.70) | 0.4950  | 21589/24562 | 88.28 (87.71-88.83) | 0.0001  |
| Mozambique | DHS 1997    | (3)     | 1818/2002   | 92.27 (89.94-94.09) | 0.0000  | 8027/8664   | 93.06 (91.71-94.21) | 0.0000  |
|            | DHS 2003    | (4)     | 2259/2496   | 90.91 (89.40-92.23) | 0.3496  | 11633/12405 | 94.31 (93.73-94.84) | 0.0867  |
|            | AIS 2009    | (5)     | 3788/4156   | 91.52 (90.05-92.79) | 0.1278  | 5340/5631   | 95.51 (94.84-96.10) | 0.2611  |
|            | DHS 2011    | (6)     | 3177/3514   | 90.30 (88.97-91.48) | 0.9724  | 12688/13745 | 92.25 (91.61-92.84) | 0.0001  |
|            | AIS 2015    | (7)     | 4248/4731   | 91.02 (90.02-91.93) | 0.8924  | 6446/6938   | 93.80 (93.13-94.41) | 0.0014  |
| Namibia    | DHS 2000    | (4)     | 2405/2692   | 89.31 (87.36-91.00) | 0.0000  | 5824/6682   | 85.36 (83.93-86.68) | 0.0000  |
|            | DHS 2006/07 | (5)     | 3347/3889   | 86.30 (84.74-87.73) | 0.0000  | 8240/9750   | 83.67 (82.51-84.77) | 0.0257  |
|            | DHS 2013    | (6)     | 3321/3926   | 84.70 (83.11-86.16) | 0.0269  | 7937/9121   | 86.02 (85.03-86.95) | 0.0407  |
| Rwanda     | DHS 2000    | (4)     | 1743/2526   | 68.97 (66.83-71.02) | 0.0000  | 7229/10416  | 70.62 (69.53-71.69) | 0.0000  |
|            | DHS 2005    | (4)     | 3050/4406   | 69.15 (67.42-70.82) | 0.0452  | 7775/11316  | 69.03 (67.98-70.05) | 0.0000  |
|            | DHS 2010    | (6)     | 3949/5692   | 69.49 (68.06-70.88) | 0.5243  | 9523/13665  | 70.02 (69.08-70.94) | 0.7236  |
|            | DHS 2014/15 | (6)     | 4000/5582   | 71.66 (70.23-73.04) | 0.2808  | 9907/13494  | 73.77 (72.90-74.63) | 0.0000  |
| Tanzania   | DHS 1996    | (3)     | 1684/2027   | 82.90 (80.96-84.68) | 0.0000  | 7027/8092   | 87.04 (85.96-88.06) | 0.0000  |
|            | DHS 1999    | (3)     | 2633/3200   | 86.95 (85.05-88.65) | 0.0000  | 3427/4025   | 87.68 (85.98-89.21) | 0.0292  |
|            | AIS 2003/04 | (5)     | 4659/5659   | 82.87 (81.52-84.15) | 0.0000  | 5967/6857   | 86.88 (85.76-87.92) | 0.0409  |
|            | DHS 2004/05 | (4)     | 2108/2633   | 84.29 (82.46-85.96) | 0.0395  | 8641/10326  | 86.93 (85.91-87.89) | 0.8846  |
|            | AIS 2007/08 | (5)     | 5140/6972   | 79.84 (78.48-81.13) | 0.0000  | 7584/9341   | 86.82 (85.90-87.69) | 0.8587  |
|            | DHS 2010    | (5)     | 1920/2527   | 80.88 (78.77-82.82) | 0.3837  | 8347/10137  | 86.16 (85.25-87.03) | 0.1265  |
|            | AIS 2011/12 | (6)     | 6532/8329   | 81.90 (80.64-83.08) | 0.6939  | 9203/10957  | 86.40 (85.45-87.30) | 0.8822  |
|            | DHS 2015/16 | (7)     | 2830/3513   | 83.25 (81.60-84.77) | 0.0009  | 11285/13266 | 87.58 (86.79-88.34) | 0.0055  |
| Uganda     | DHS 1995    | (3)     | 1660/1902   | 86.46 (84.23-88.42) | 0.0000  | 6294/7034   | 90.26 (89.14-91.27) | 0.0000  |
|            | DHS 2000/01 | (4)     | 1561/1881   | 83.00 (80.64-85.13) | 0.1513  | 6330/7237   | 88.28 (87.25-89.25) | 0.0006  |
|            | DHS 2006    | (5)     | 1948/2383   | 81.22 (79.29-83.01) | 0.4288  | 7239/8527   | 85.34 (84.35-86.28) | 0.0000  |
|            | DHS 2011    | (6)     | 1795/2188   | 81.83 (79.66-83.81) | 0.4084  | 7350/8660   | 85.22 (84.21-86.17) | 0.5767  |
|            | DHS 2016    | (7)     | 4172/5043   | 82.49 (81.10-83.80) | 0.2940  | 15827/18498 | 85.42 (84.67-86.15) | 0.9528  |
| Zambia     | DHS 1996    | (3)     | 1527/1717   | 88.18 (86.17-89.94) | 0.0000  | 7109/8002   | 88.20 (87.35-89.00) | 0.0000  |
|            | DHS 2001/02 | (4)     | 1757/1969   | 89.72 (88.16-91.09) | 0.7484  | 6768/7642   | 88.13 (87.08-89.11) | 0.2435  |
|            | DHS 2007    | (5)     | 5095/6001   | 83.83 (82.41-85.15) | 0.0000  | 6210/7142   | 86.67 (85.34-87.89) | 0.0009  |
|            | DHS 2013/14 | (6)     | 11496/13522 | 84.19 (83.31-85.03) | 0.3421  | 14244/16383 | 86.61 (85.80-87.38) | 0.8468  |
| Zimbabwe   | DHS 1994    | (3)     | 1565/2024   | 77.07 (74.59-79.38) | 0.0000  | 4919/6127   | 79.07 (77.70-80.38) | 0.0000  |
|            | DHS 1999    | (4)     | 1829/2483   | 74.45 (72.29-76.49) | 0.0020  | 4746/5904   | 79.30 (77.67-80.84) | 0.3256  |
|            | DHS 2005/06 | (5)     | 4978/6830   | 73.80 (72.34-75.20) | 0.1116  | 7033/8898   | 79.24 (78.11-80.32) | 0.6974  |
|            | DHS 2010/11 | (6)     | 5294/7104   | 74.77 (73.34-76.15) | 0.0052  | 7509/9171   | 81.88 (80.78-82.94) | 0.4918  |
|            | DHS 2015    | (7)     | 6177/8018   | 75.83 (74.58-77.03) | 0.0047  | 8130/9955   | 81.51 (80.36-82.60) | 0.6724  |

Sample sizes (n/N) refer to unadjusted numbers of people reporting to have had sex (n) among everyone with data on this variable (N). Proportions (%) and 95% confidence intervals (95% CI) are adjusted for survey design and sampling weights. The p-values refer to results from logistic regressions with odds ratios of having had sex calculated for one survey compared with the preceding one, adjusted for age. These are also adjusted for survey design and sampling weights.

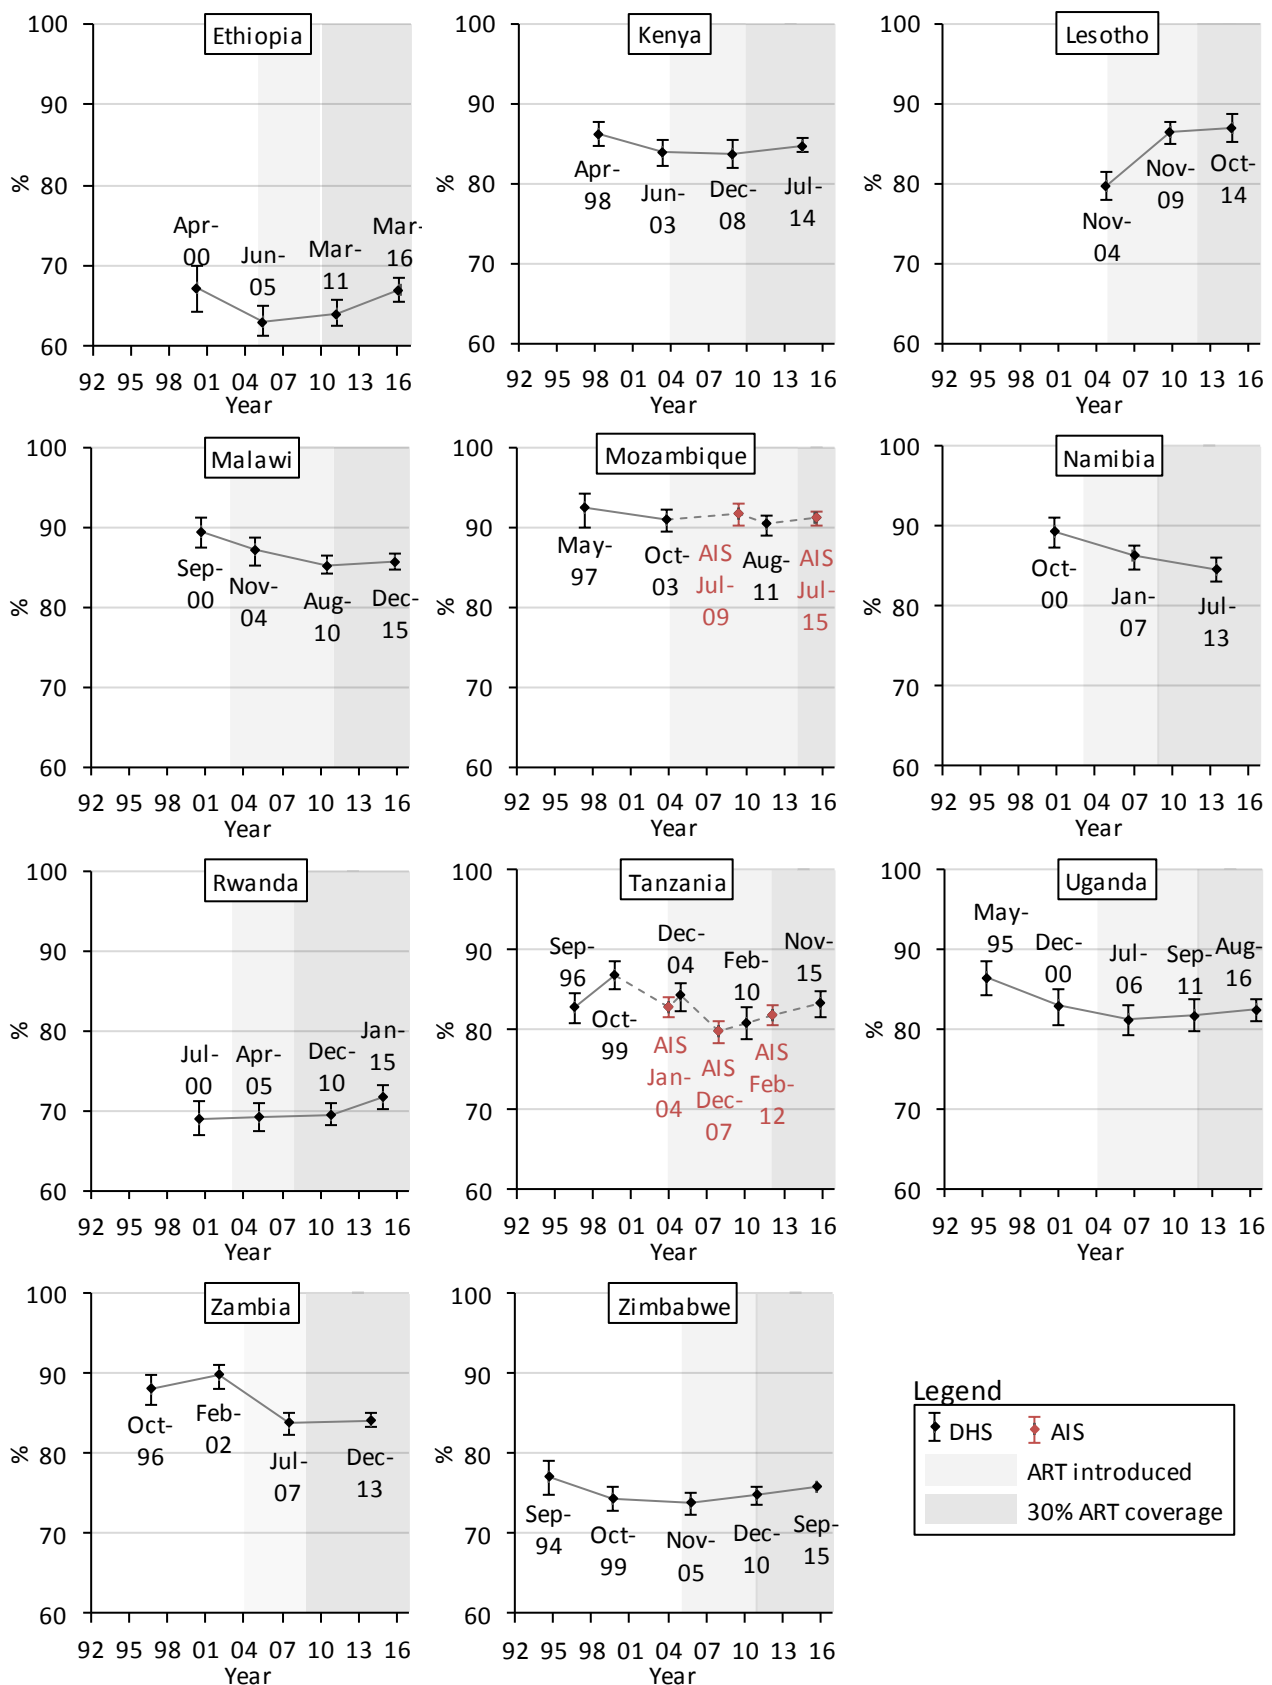

**Figure S7a. Trends in reporting of having had sex among males (12-49 years), eastern and southern Africa.** The sample included males aged 15-49 years. Dates refer to the mid-points of the survey data collection period. Data from AIS are indicated in red. Data from different survey types are linked with dashed lines. Shaded areas indicate the years in which ART was introduced into the public healthcare sector in each country and from when 30% of adult PLWH (15+ years) were in treatment (disregarding treatment eligibility criteria; see Supporting Information, Section 2).



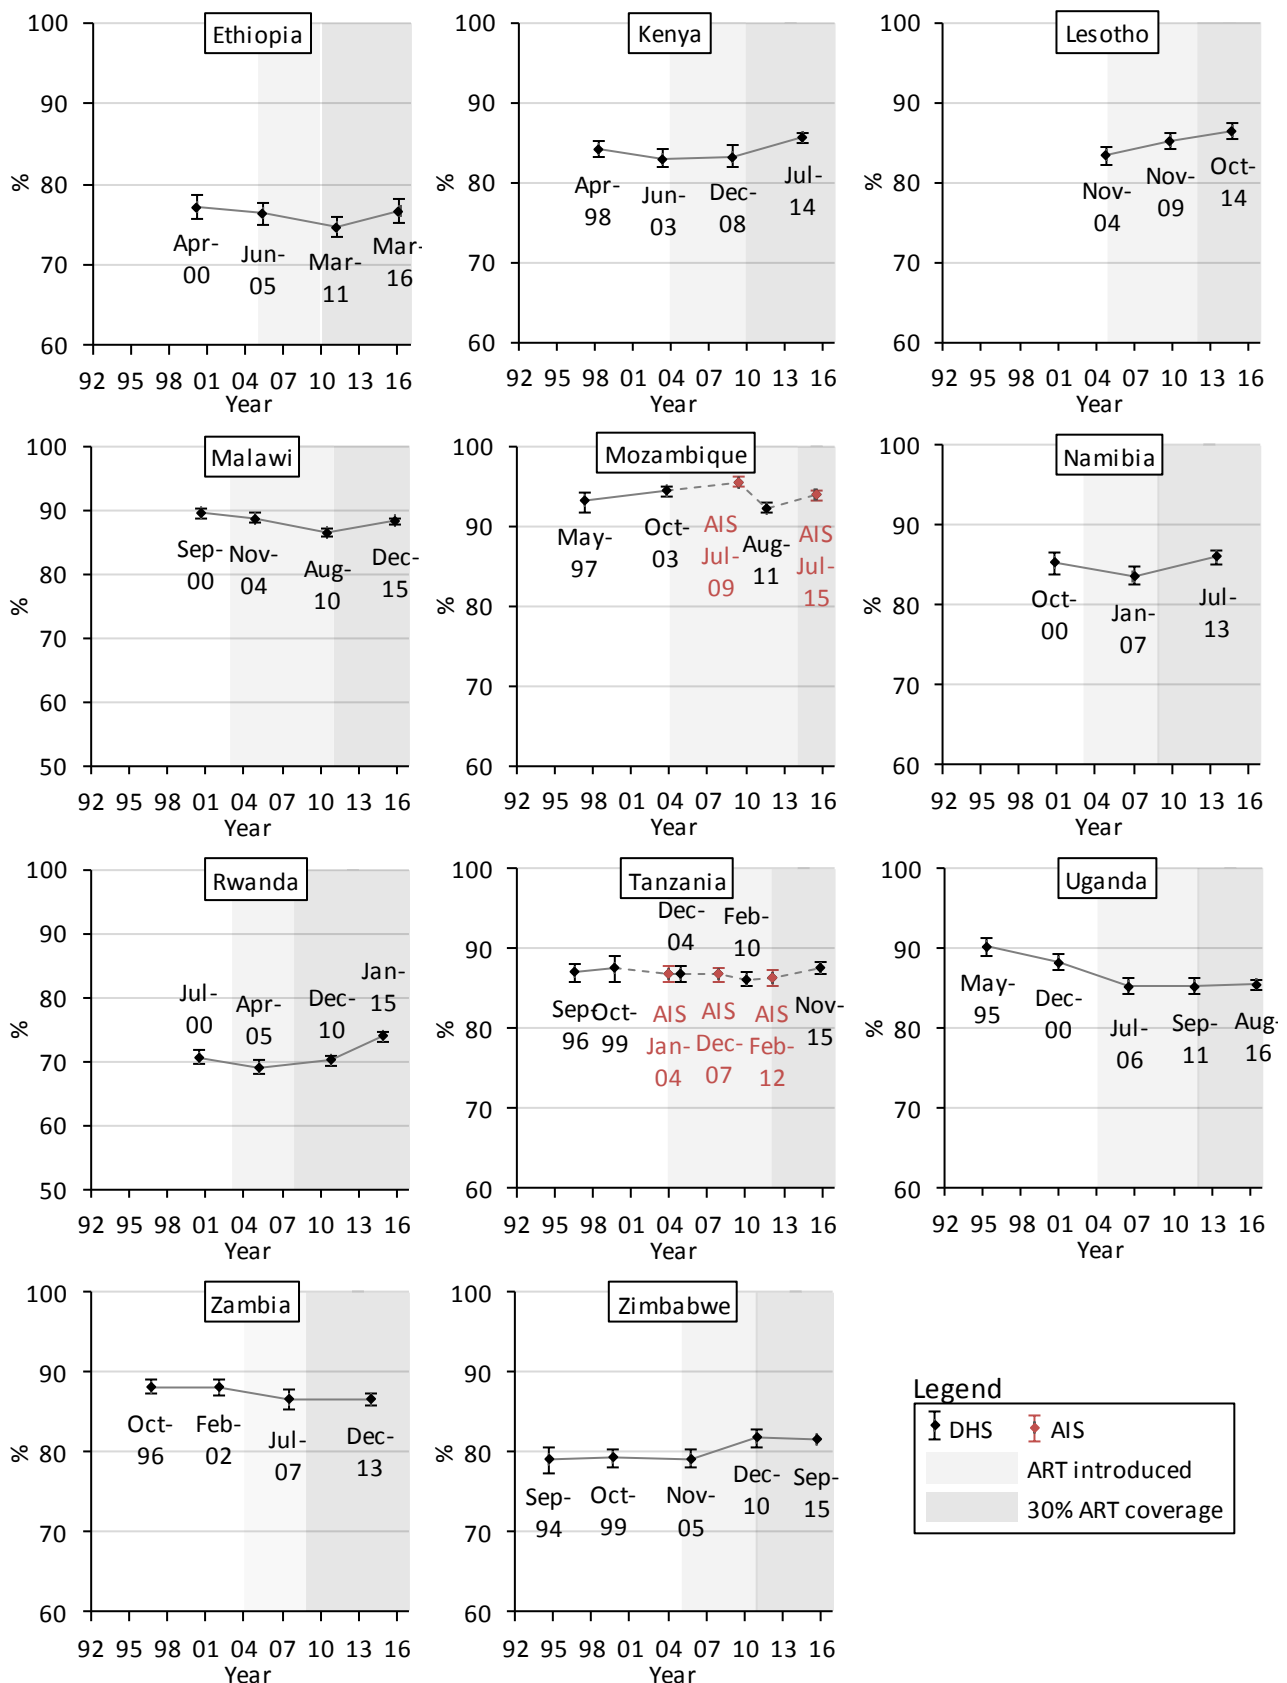

**Figure S7b. Trends in reporting of having had sex among females (12-49 years), eastern and southern Africa.** The sample included females aged 15-49 years. Dates refer to the mid-points of the survey data collection period. Data from AIS are indicated in red. Data from different survey types are linked with dashed lines. Shaded areas indicate the years in which ART was introduced into the public healthcare sector in each country and from when 30% of adult PLWH (15+ years) were in treatment (disregarding treatment eligibility criteria; see Supporting Information, Section 2).

**Table S12:** Multiple sexual partnerships (including those who have never had sex before), eastern and southern Africa.

| Country    | Survey      | (Phase) | Males      |                     |         | Females   |                  |         |
|------------|-------------|---------|------------|---------------------|---------|-----------|------------------|---------|
|            |             |         | Sample     | Adj. proportions    | Logit   | Sample    | Adj. proportions | Logit   |
|            |             |         | n/N        | % (95% CI)          | p-value | n/N       | % (95% CI)       | p-value |
| Ethiopia   | DHS 2000    | (4)     | 158/2336   | 6.54 (5.17-8.25)    |         | 141/15352 | 1.03 (0.75-1.4)  |         |
|            | DHS 2005    | (4)     | 176/5467   | 2.36 (1.87-2.98)    | <0.0001 | 15/8579   | 0.12 (0.06-0.26) | <0.0001 |
|            | DHS 2011    | (6)     | 562/12846  | 3.47 (2.97-4.05)    | 0.0069  | 73/16491  | 0.35 (0.22-0.54) | 0.0171  |
|            | DHS 2016    | (7)     | 443/11577  | 3.37 (2.81-4.04)    | 0.5497  | 47/15673  | 0.28 (0.18-0.44) | 0.5199  |
| Kenya      | DHS 2003    | (4)     | 381/3345   | 11.71 (10.44-13.12) |         | 130/8170  | 1.74 (1.43-2.13) |         |
|            | DHS 2008/09 | (5)     | 340/3249   | 9.33 (8.08-10.76)   | 0.0123  | 102/8423  | 1.18 (0.91-1.55) | 0.0239  |
|            | DHS 2014    | (6)     | 1382/11997 | 12.70 (11.86-13.59) | 0.0002  | 182/17124 | 1.21 (0.97-1.51) | 0.8990  |
| Lesotho    | DHS 2004    | (4)     | 527/2486   | 21.01 (18.96-23.22) |         | 581/7090  | 7.71 (6.98-8.51) |         |
|            | DHS 2009    | (5)     | 660/2954   | 22.25 (20.29-24.34) | 0.4107  | 493/7534  | 6.44 (5.71-7.25) | 0.0304  |
|            | DHS 2014    | (6)     | 666/2583   | 26.97 (24.43-29.68) | 0.0056  | 430/6571  | 6.63 (5.87-7.49) | 0.7730  |
| Malawi     | DHS 2000    | (4)     | 424/2918   | 14.56 (13.00-16.28) |         | 121/13220 | 0.78 (0.62-0.98) |         |
|            | DHS 2004    | (4)     | 300/3081   | 9.13 (7.90-10.52)   | <0.0001 | 97/11696  | 0.84 (0.67-1.04) | 0.6971  |
|            | DHS 2010    | (5)     | 651/6790   | 9.22 (8.40-10.11)   | 0.8528  | 132/22986 | 0.65 (0.53-0.81) | 0.1216  |
|            | DHS 2015/16 | (7)     | 969/7138   | 12.87 (11.85-13.97) | <0.0001 | 285/24558 | 1.24 (1.07-1.45) | 0.0000  |
| Mozambique | DHS 2003    | (4)     | 821/2497   | 30.24 (27.75-32.85) |         | 603/12405 | 4.92 (4.32-5.60) |         |
|            | AIS 2009    | (5)     | 840/4141   | 19.62 (17.40-22.05) | <0.0001 | 180/5645  | 2.96 (2.39-3.67) | 0.0002  |
|            | DHS 2011    | (6)     | 1174/3498  | 29.25 (27.45-31.11) | <0.0001 | 443/12897 | 2.93 (2.61-3.28) | 0.8027  |
|            | AIS 2015    | (7)     | 1028/4722  | 20.57 (18.72-22.56) | <0.0001 | 222/6943  | 2.92 (2.33-3.64) | 0.9884  |
| Namibia    | DHS 2000    | (4)     | 480/2706   | 16.39 (13.96-19.15) |         | 156/6701  | 1.96 (1.60-2.40) |         |
|            | DHS 2006/07 | (5)     | 415/3881   | 11.30 (9.94-12.82)  | 0.0004  | 144/9710  | 1.68 (1.31-2.15) | 0.3505  |
|            | DHS 2013    | (6)     | 388/3926   | 10.51 (9.25-11.92)  | 0.4319  | 213/9104  | 2.23 (1.86-2.67) | 0.0543  |
| Rwanda     | DHS 2000    | (4)     | 66/2531    | 2.35 (1.76-3.14)    |         | 31/10410  | 0.27 (0.18-0.41) |         |
|            | DHS 2005    | (4)     | 119/4410   | 2.75 (2.23-3.38)    | 0.4584  | 37/11319  | 0.31 (0.22-0.44) | 0.6082  |
|            | DHS 2010    | (6)     | 227/5694   | 3.92 (3.45-4.46)    | 0.0013  | 79/13667  | 0.59 (0.47-0.75) | 0.0028  |
|            | DHS 2014/15 | (6)     | 252/5580   | 4.51 (3.96-5.13)    | 0.2372  | 99/13492  | 0.70 (0.56-0.87) | 0.3078  |
| Tanzania   | AIS 2003/04 | (5)     | 1114/5650  | 20.05 (18.74-21.42) |         | 327/6863  | 4.71 (4.13-5.36) |         |
|            | DHS 2004/05 | (4)     | 542/2629   | 22.59 (20.40-24.94) | 0.0511  | 296/10326 | 3.31 (2.86-3.82) | 0.0004  |
|            | AIS 2007/08 | (5)     | 1061/6958  | 17.92 (16.74-19.18) | 0.0001  | 196/9329  | 2.64 (2.25-3.08) | 0.0348  |
|            | DHS 2010    | (5)     | 472/2525   | 20.63 (18.54-22.89) | 0.0360  | 291/10139 | 3.52 (2.99-4.15) | 0.0119  |
| Uganda     | AIS 2011/12 | (6)     | 1585/8334  | 20.78 (19.39-22.25) | 0.9796  | 365/10943 | 3.78 (3.31-4.32) | 0.5096  |
|            | DHS 2000/01 | (4)     | 363/1882   | 18.01 (15.93-20.30) |         | 137/7244  | 1.60 (1.29-1.99) |         |
|            | DHS 2006    | (5)     | 498/2383   | 20.50 (18.58-22.55) | 0.1085  | 141/8516  | 1.77 (1.46-2.14) | 0.5078  |
|            | DHS 2011    | (6)     | 412/2190   | 18.61 (16.62-20.78) | 0.1931  | 142/8658  | 1.60 (1.29-1.98) | 0.4983  |
| Zambia     | DHS 2016    | (7)     | 1063/5043  | 20.50 (19.16-21.90) | 0.0953  | 430/18506 | 2.30 (2.04-2.60) | 0.0037  |
|            | DHS 2001/02 | (4)     | 407/1976   | 21.30 (19.29-23.45) |         | 146/7656  | 2.07 (1.73-2.48) |         |
|            | DHS 2007    | (5)     | 909/5988   | 14.43 (13.33-15.61) | <0.0001 | 95/7142   | 1.20 (0.96-1.50) | 0.0003  |
| Zimbabwe   | DHS 2013/14 | (6)     | 2101/13519 | 15.65 (14.78-16.57) | 0.1525  | 263/16397 | 1.68 (1.42-1.99) | 0.0184  |
|            | DHS 1999    | (4)     | 344/2487   | 12.92 (11.46-14.54) |         | 103/5902  | 1.66 (1.33-2.06) |         |
|            | DHS 2005/06 | (5)     | 580/6840   | 8.99 (8.14-9.92)    | <0.0001 | 77/8902   | 0.88 (0.67-1.14) | 0.0003  |
|            | DHS 2010/11 | (6)     | 718/7019   | 10.66 (9.73-11.66)  | 0.0214  | 101/9055  | 1.11 (0.89-1.38) | 0.1704  |
|            | DHS 2015    | (7)     | 1163/8014  | 14.19 (13.28-15.16) | <0.0001 | 127/9900  | 1.10 (0.88-1.38) | 0.9754  |

Sample sizes (n/N) refer to unadjusted numbers of people reporting multiple sexual partnerships (n) among everyone (including those who have not had sex before) (N). Proportions (%) and 95% confidence intervals (95% CI) are adjusted for survey design and sampling weights. The p-values refer to results from logistic regressions with odds ratios of multiple sexual partnerships calculated for one survey compared with the preceding one, adjusted for age. These are also adjusted for survey design and sampling weights.

**Table S13:** Non-regular sexual partnerships (including those who have never had sex before), eastern and southern Africa.

| Country    | Survey      | (Phase) | Males      |                     |         | Females    |                     |         |
|------------|-------------|---------|------------|---------------------|---------|------------|---------------------|---------|
|            |             |         | Sample     | Adj. proportions    | Logit   | Sample     | Adj. proportions    | Logit   |
|            |             |         | n/N        | % (95% CI)          | p-value | n/N        | % (95% CI)          | p-value |
| Ethiopia   | DHS 2000    | (4)     | 424/2336   | 15.83 (13.37-18.65) |         | 613/15344  | 3.04 (2.56-3.60)    |         |
|            | DHS 2005    | (4)     | 444/5470   | 4.90 (4.16-5.76)    | 0.0000  | 170/8593   | 1.45 (1.14-1.83)    | <0.0001 |
|            | DHS 2011    | (6)     | 1106/12863 | 5.67 (5.06-6.36)    | 0.1327  | 543/16507  | 2.60 (2.21-3.06)    | <0.0001 |
|            | DHS 2016    | (7)     | 1129/11578 | 6.88 (6.02-7.85)    | 0.0153  | 483/15683  | 2.40 (2.01-2.88)    | 0.5670  |
| Kenya      | DHS 2003    | (4)     | 895/3343   | 27.87 (25.88-29.95) |         | 1002/8181  | 12.29 (11.40-13.23) |         |
|            | DHS 2008/09 | (5)     | 821/3256   | 24.98 (22.99-27.07) | 0.1209  | 1018/8438  | 12.83 (11.63-14.13) | 0.3921  |
|            | DHS 2014    | (6)     | 3294/12007 | 30.21 (28.80-31.66) | <0.0001 | 1810/17112 | 12.29 (11.52-13.11) | 0.3197  |
| Lesotho    | DHS 2004    | (4)     | 1128/2492  | 44.06 (41.66-46.49) |         | 1838/7084  | 25.41 (24.17-26.70) |         |
|            | DHS 2009    | (5)     | 1477/2988  | 48.84 (46.69-50.99) | 0.0034  | 1861/7624  | 24.71 (23.44-26.02) | 0.4539  |
|            | DHS 2014    | (6)     | 1389/2626  | 53.44 (51.13-55.74) | 0.0022  | 1736/6621  | 26.50 (25.03-28.03) | 0.0739  |
| Malawi     | DHS 2000    | (4)     | 838/2913   | 28.04 (25.91-30.27) |         | 1024/13217 | 7.23 (6.64-7.88)    |         |
|            | DHS 2004    | (4)     | 632/3081   | 19.99 (18.21-21.91) | <0.0001 | 767/11686  | 6.46 (5.82-7.17)    | 0.0828  |
|            | DHS 2010    | (5)     | 1370/6799  | 19.92 (18.53-21.39) | 0.5262  | 1472/23007 | 6.57 (6.08-7.08)    | 0.6690  |
|            | DHS 2015/16 | (7)     | 1968/7138  | 26.82 (25.39-28.29) | <0.0001 | 2455/24562 | 9.93 (9.38-10.51)   | <0.0001 |
| Mozambique | DHS 2003    | (4)     | 1158/2502  | 43.57 (40.36-46.84) |         | 2339/12393 | 17.30 (16.12-18.54) |         |
|            | AIS 2009    | (5)     | 1604/4158  | 34.58 (31.67-37.62) | 0.0004  | 1049/5642  | 15.38 (13.88-17.02) | 0.1383  |
|            | DHS 2011    | (6)     | 1770/3514  | 45.97 (43.74-48.22) | <0.0001 | 2624/13745 | 16.36 (15.39-17.38) | 0.5965  |
|            | AIS 2015    | (7)     | 2007/4733  | 38.67 (36.42-40.97) | <0.0001 | 1512/6938  | 18.13 (16.62-19.74) | 0.0495  |
| Namibia    | DHS 2000    | (4)     | 1266/2700  | 47.25 (43.70-50.83) |         | 2494/6680  | 37.26 (34.90-39.68) |         |
|            | DHS 2006/07 | (5)     | 1625/3872  | 42.03 (39.77-44.32) | 0.0284  | 3158/9642  | 33.20 (31.77-34.67) | 0.0043  |
|            | DHS 2013    | (6)     | 1837/3922  | 48.99 (46.71-51.27) | <0.0001 | 3597/9092  | 41.09 (39.69-42.50) | <0.0001 |
| Rwanda     | DHS 2000    | (4)     | 225/2529   | 7.38 (6.36-8.56)    |         | 379/10405  | 3.35 (2.95-3.81)    |         |
|            | DHS 2005    | (4)     | 401/4412   | 8.79 (7.83-9.85)    | 0.0629  | 504/11318  | 4.26 (3.87-4.68)    | 0.0033  |
|            | DHS 2010    | (6)     | 583/5694   | 9.91 (9.05-10.84)   | 0.1135  | 742/13668  | 5.27 (4.84-5.72)    | 0.0010  |
|            | DHS 2014/15 | (6)     | 656/5581   | 11.37 (10.38-12.44) | 0.0222  | 1035/13489 | 7.41 (6.94-7.92)    | <0.0001 |
| Tanzania   | AIS 2003/04 | (5)     | 1899/5655  | 34.12 (32.41-35.88) |         | 1220/6863  | 17.81 (16.62-19.07) |         |
|            | DHS 2004/05 | (4)     | 775/2634   | 33.72 (31.28-36.25) | 0.7700  | 1328/10327 | 14.84 (13.75-16.00) | 0.0006  |
|            | AIS 2007/08 | (5)     | 1677/6972  | 29.25 (27.72-30.82) | 0.0030  | 1181/9341  | 15.92 (14.75-17.16) | 0.1611  |
|            | DHS 2010    | (5)     | 733/2527   | 32.89 (30.40-35.49) | 0.0133  | 1501/10137 | 17.87 (16.82-18.97) | 0.0173  |
| Uganda     | AIS 2011/12 | (6)     | 2476/8342  | 32.78 (31.27-34.33) | 0.9912  | 1628/10961 | 16.90 (15.90-17.95) | 0.2259  |
|            | DHS 2000/01 | (4)     | 438/1881   | 21.26 (18.95-23.78) |         | 864/7236   | 10.75 (9.62-11.99)  |         |
|            | DHS 2006    | (5)     | 606/2384   | 25.53 (23.54-27.62) | 0.0086  | 980/8527   | 11.79 (10.93-12.72) | 0.1263  |
|            | DHS 2011    | (6)     | 533/2190   | 23.34 (21.00-25.84) | 0.1739  | 967/8664   | 10.94 (10.18-11.74) | 0.1385  |
| Zambia     | DHS 2016    | (7)     | 1483/5043  | 30.33 (28.73-31.98) | <0.0001 | 2670/18502 | 14.83 (14.07-15.62) | <0.0001 |
|            | DHS 2001/02 | (4)     | 701/1973   | 36.19 (33.69-38.76) |         | 1022/7648  | 13.17 (12.17-14.22) |         |
|            | DHS 2007    | (5)     | 1742/6002  | 27.65 (26.11-29.26) | <0.0001 | 998/7142   | 12.59 (11.63-13.62) | 0.7003  |
| Zimbabwe   | DHS 2013/14 | (6)     | 4016/13517 | 29.28 (28.17-30.42) | 0.0528  | 2521/16383 | 14.27 (13.45-15.14) | 0.0060  |
|            | DHS 1999    | (4)     | 752/2489   | 28.97 (27.03-31.00) |         | 681/5907   | 9.75 (8.76-10.85)   |         |
|            | DHS 2005/06 | (5)     | 1500/6843  | 22.23 (20.96-23.55) | <0.0001 | 693/8900   | 7.56 (6.85-8.33)    | 0.0006  |
|            | DHS 2010/11 | (6)     | 1692/7104  | 22.73 (21.52-23.99) | 0.3087  | 863/9171   | 8.09 (7.43-8.81)    | 0.2610  |
|            | DHS 2015    | (7)     | 2203/8017  | 25.60 (24.32-26.92) | 0.0006  | 1172/9955  | 10.16 (9.30-11.09)  | 0.0003  |

Sample sizes (n/N) refer to unadjusted numbers of people reporting non-regular sexual partnerships (n) among everyone (including those who have not had sex before) (N). Proportions (%) and 95% confidence intervals (95% CI) are adjusted for survey design and sampling weights. The p-values refer to results from logistic regressions with odds ratios of non-regular sexual partnerships calculated for one survey compared with the preceding one, adjusted for age. These are also adjusted for survey design and sampling weights.

**Table S14:** Casual sexual partnerships (including those who have never had sex before), eastern and southern Africa.

| Country    | Survey      | (Phase) | Males     |                     |         | Females    |                  |         |
|------------|-------------|---------|-----------|---------------------|---------|------------|------------------|---------|
|            |             |         | Sample    | Adj. proportions    | Logit   | Sample     | Adj. proportions | Logit   |
|            |             |         | n/N       | % (95% CI)          | p-value | n/N        | % (95% CI)       | p-value |
| Ethiopia   | DHS 2000    | (4)     | 41/2214   | 2.55 (1.73-3.75)    |         | 91/15270   | 0.78 (0.55-1.11) |         |
|            | DHS 2005    | (4)     | 141/5467  | 1.51 (1.15-1.98)    | 0.0267  | 28/8587    | 0.16 (0.09-0.29) | <0.0001 |
|            | DHS 2011    | (6)     | 345/12855 | 1.82 (1.52-2.18)    | 0.2531  | 83/16491   | 0.41 (0.27-0.63) | 0.0103  |
|            | DHS 2016    | (7)     | 356/11574 | 2.00 (1.60-2.49)    | 0.4614  | 55/15677   | 0.36 (0.24-0.55) | 0.6982  |
| Kenya      | DHS 2003    | (4)     | 233/3206  | 7.53 (6.38-8.86)    |         | 54/8081    | 0.61 (0.44-0.84) |         |
|            | DHS 2008/09 | (5)     | 152/3254  | 4.68 (3.77-5.80)    | 0.0007  | 65/8407    | 0.90 (0.60-1.36) | 0.1465  |
|            | DHS 2014    | (6)     | 743/11973 | 7.28 (6.58-8.05)    | 0.0002  | 147/17084  | 0.87 (0.70-1.09) | 0.9964  |
| Lesotho    | DHS 2004    | (4)     | 72/2447   | 3.18 (2.41-4.20)    |         | 45/7003    | 0.54 (0.37-0.80) |         |
|            | DHS 2009    | (5)     | 256/2988  | 8.47 (7.39-9.69)    | <0.0001 | 139/7613   | 2.07 (1.69-2.54) | <0.0001 |
|            | DHS 2014    | (6)     | 274/2625  | 10.73 (9.16-12.54)  | 0.0334  | 175/6616   | 2.62 (2.19-3.13) | 0.0942  |
| Malawi     | DHS 2000    | (4)     | 189/2845  | 6.99 (5.85-8.32)    |         | 47/13192   | 0.33 (0.23-0.48) |         |
|            | DHS 2004    | (4)     | 147/3022  | 4.96 (4.09-6.01)    | 0.0118  | 47/11665   | 0.34 (0.24-0.50) | 0.8995  |
|            | DHS 2010    | (5)     | 213/6783  | 3.45 (2.91-4.08)    | 0.0029  | 43/22955   | 0.21 (0.14-0.33) | 0.0961  |
|            | DHS 2015/16 | (7)     | 349/7133  | 4.89 (4.31-5.54)    | 0.0010  | 118/24556  | 0.46 (0.36-0.61) | 0.0038  |
| Mozambique | DHS 2003    | (4)     | 443/2279  | 19.98 (17.48-22.73) |         | 1009/12386 | 8.13 (7.38-8.96) |         |
|            | AIS 2009    | (5)     | 477/4110  | 10.08 (8.71-11.63)  | <0.0001 | 144/5577   | 2.31 (1.88-2.83) | <0.0001 |
|            | DHS 2011    | (6)     | 960/3510  | 22.47 (20.91-24.10) | <0.0001 | 605/13697  | 4.13 (3.73-4.56) | <0.0001 |
|            | AIS 2015    | (7)     | 759/4731  | 14.24 (12.47-16.22) | <0.0001 | 334/6933   | 4.22 (3.52-5.05) | 0.8277  |
| Namibia    | DHS 2000    | (4)     | 342/2507  | 10.71 (8.13-13.99)  |         | 60/6639    | 0.95 (0.65-1.38) |         |
|            | DHS 2006/07 | (5)     | 513/3868  | 13.25 (11.58-15.12) | 0.1572  | 76/9632    | 0.83 (0.62-1.11) | 0.5756  |
|            | DHS 2013    | (6)     | 442/3917  | 10.82 (9.55-12.24)  | 0.0326  | 93/9082    | 0.84 (0.65-1.10) | 0.9435  |
| Rwanda     | DHS 2000    | (4)     | 98/2467   | 3.34 (2.64-4.22)    |         | 71/10262   | 0.64 (0.49-0.84) |         |
|            | DHS 2005    | (4)     | 91/4344   | 1.97 (1.60-2.43)    | 0.0012  | 40/11278   | 0.33 (0.24-0.46) | 0.0019  |
|            | DHS 2010    | (6)     | 141/5687  | 2.37 (2.00-2.81)    | 0.1849  | 53/13620   | 0.41 (0.32-0.54) | 0.2903  |
|            | DHS 2014/15 | (6)     | 121/5581  | 2.09 (1.69-2.59)    | 0.3737  | 62/13455   | 0.41 (0.31-0.56) | 0.9788  |
| Tanzania   | AIS 2003/04 | (5)     | 892/5643  | 15.18 (14.03-16.41) |         | 180/6853   | 2.57 (2.19-3.02) |         |
|            | DHS 2004/05 | (4)     | 413/2633  | 18.29 (16.50-20.21) | 0.0049  | 150/10311  | 1.82 (1.50-2.20) | 0.0071  |
|            | AIS 2007/08 | (5)     | 525/6969  | 9.61 (8.75-10.56)   | <0.0001 | 117/9334   | 1.56 (1.27-1.90) | 0.2988  |
|            | DHS 2010    | (5)     | 173/2521  | 8.47 (7.15-10.00)   | 0.1992  | 81/10119   | 0.89 (0.68-1.17) | 0.0011  |
| Uganda     | AIS 2011/12 | (6)     | 603/8334  | 8.02 (7.27-8.84)    | 0.6129  | 129/10953  | 1.17 (0.95-1.45) | 0.1123  |
|            | DHS 2000/01 | (4)     | 68/1807   | 3.12 (2.30-4.22)    |         | 33/7153    | 0.42 (0.26-0.67) |         |
|            | DHS 2006    | (5)     | 155/2378  | 6.77 (5.43-8.42)    | <0.0001 | 78/8495    | 1.09 (0.84-1.40) | 0.0004  |
|            | DHS 2011    | (6)     | 110/2186  | 5.06 (3.98-6.41)    | 0.0764  | 102/8653   | 1.31 (1.02-1.67) | 0.3018  |
| Zambia     | DHS 2016    | (7)     | 413/5043  | 8.35 (7.47-9.32)    | 0.0002  | 250/18485  | 1.40 (1.21-1.63) | 0.6349  |
|            | DHS 2001/02 | (4)     | 196/1879  | 11.08 (9.47-12.91)  |         | 42/7600    | 0.56 (0.41-0.76) |         |
|            | DHS 2007    | (5)     | 342/5995  | 5.52 (4.88-6.24)    | <0.0001 | 54/7116    | 0.67 (0.49-0.93) | 0.3595  |
| Zimbabwe   | DHS 2013/14 | (6)     | 498/13505 | 3.82 (3.32-4.40)    | 0.0002  | 66/16354   | 0.41 (0.30-0.56) | 0.0307  |
|            | DHS 1999    | (4)     | 80/2376   | 4.17 (3.24-5.35)    |         | 57/5835    | 1.08 (0.76-1.52) |         |
|            | DHS 2005/06 | (5)     | 200/6832  | 3.03 (2.57-3.57)    | 0.0359  | 28/8886    | 0.30 (0.20-0.45) | <0.0001 |
|            | DHS 2010/11 | (6)     | 241/7100  | 3.46 (2.98-4.02)    | 0.2257  | 45/9157    | 0.39 (0.28-0.55) | 0.3618  |
|            | DHS 2015    | (7)     | 391/8015  | 4.56 (4.02-5.18)    | 0.0058  | 67/9951    | 0.53 (0.36-0.77) | 0.2507  |

Sample sizes (n/N) refer to unadjusted numbers of people reporting casual sexual partnerships (n) among everyone (including those who have not had sex before) (N). Proportions (%) and 95% confidence intervals (95% CI) are adjusted for survey design and sampling weights. The p-values refer to results from logistic regressions with odds ratios of casual sexual partnerships calculated for one survey compared with the preceding one, adjusted for age. These are also adjusted for survey design and sampling weights.

**Table S15:** Age at first sex before the age of 18 years (including those who have never had sex before), eastern and southern Africa.

| Country    | Survey      | (Phase) | Males     |                     |         | Females    |                     |         |
|------------|-------------|---------|-----------|---------------------|---------|------------|---------------------|---------|
|            |             |         | Sample    | Adj. proportions    | Logit   | Sample     | Adj. proportions    | Logit   |
|            |             |         | n/N       | % (95% CI)          | p-value | n/N        | % (95% CI)          | p-value |
| Ethiopia   | DHS 2000    | (4)     | 192/786   | 22.13 (18.17-26.66) |         | 2802/5560  | 53.10 (50.27-55.91) |         |
|            | DHS 2005    | (4)     | 351/1869  | 14.97 (12.93-17.28) | 0.0020  | 2626/5174  | 54.87 (52.28-57.44) | 0.3191  |
|            | DHS 2011    | (6)     | 833/4604  | 15.36 (13.57-17.33) | 0.8978  | 2946/6207  | 49.25 (46.83-51.68) | 0.0008  |
|            | DHS 2016    | (7)     | 656/3999  | 14.11 (12.40-16.02) | 0.2919  | 2690/5748  | 47.97 (45.16-50.79) | 0.4353  |
| Kenya      | DHS 1998    | (3)     | 735/1054  | 68.39 (64.88-71.69) |         | 1651/2886  | 59.06 (56.65-61.43) |         |
|            | DHS 2003    | (4)     | 657/1188  | 58.48 (55.24-61.64) | <0.0001 | 1462/3110  | 49.19 (46.49-51.88) | <0.0001 |
|            | DHS 2008/09 | (5)     | 635/1108  | 55.72 (51.08-60.26) | 0.3303  | 1519/3167  | 46.46 (42.94-50.02) | 0.2299  |
|            | DHS 2014    | (6)     | 2233/3923 | 58.74 (56.54-60.90) | 0.2533  | 5898/11344 | 47.90 (46.15-49.66) | 0.4980  |
| Lesotho    | DHS 2004    | (4)     | 392/875   | 44.42 (40.66-48.24) |         | 963/2482   | 37.67 (35.42-39.96) | <0.0001 |
|            | DHS 2009    | (5)     | 619/1093  | 56.64 (52.90-60.30) | <0.0001 | 1230/2759  | 43.66 (41.29-46.06) | 0.0003  |
|            | DHS 2014    | (6)     | 547/928   | 59.17 (55.36-62.87) | 0.3318  | 1025/2372  | 41.57 (38.78-44.41) | 0.2629  |
| Malawi     | DHS 2000    | (4)     | 598/1128  | 50.23 (46.74-53.72) |         | 3421/5356  | 62.48 (60.50-64.42) |         |
|            | DHS 2004    | (4)     | 550/1200  | 43.64 (40.51-46.82) | 0.0091  | 2958/4960  | 56.42 (54.54-58.27) | <0.0001 |
|            | DHS 2010    | (5)     | 1057/2281 | 47.11 (44.28-49.95) | 0.1394  | 5306/8705  | 59.65 (57.99-61.29) | 0.0086  |
|            | DHS 2015/16 | (7)     | 1142/2410 | 46.91 (44.32-49.53) | 0.7862  | 5369/9070  | 58.87 (57.39-60.34) | 0.5204  |
| Mozambique | DHS 1997    | (3)     | 366/631   | 49.78 (43.51-56.06) |         | 2432/3277  | 78.41 (75.90-80.72) |         |
|            | DHS 2003    | (4)     | 532/815   | 64.82 (60.52-68.89) | 0.0001  | 3556/4659  | 77.98 (76.34-79.54) | 0.7836  |
|            | AIS 2009    | (5)     | 852/1388  | 61.04 (56.84-65.09) | 0.2223  | 1508/2093  | 73.45 (70.45-76.24) | 0.0047  |
|            | DHS 2011    | (6)     | 815/1196  | 67.58 (64.06-70.91) | 0.0201  | 3760/4808  | 78.59 (76.97-80.13) | 0.0015  |
|            | AIS 2015    | (7)     | 1066/1633 | 66.67 (63.48-69.71) | 0.6625  | 1786/2470  | 74.54 (72.18-76.77) | 0.0033  |
| Namibia    | DHS 2000    | (4)     | 608/1003  | 61.89 (57.85-65.76) |         | 1044/2426  | 41.15 (38.14-44.22) |         |
|            | DHS 2006/07 | (5)     | 798/1421  | 57.10 (53.80-60.35) | 0.1045  | 1480/3438  | 41.22 (39.08-43.41) | 0.9161  |
|            | DHS 2013    | (6)     | 755/1384  | 54.24 (51.17-57.28) | 0.1894  | 1352/3215  | 38.37 (36.41-40.38) | 0.0471  |
| Rwanda     | DHS 2000    | (4)     | 202/824   | 26.13 (22.84-29.71) |         | 845/3530   | 25.00 (23.25-26.84) |         |
|            | DHS 2005    | (4)     | 412/1598  | 25.58 (23.25-28.06) | 0.6766  | 882/4101   | 21.39 (20.05-22.80) | 0.0016  |
|            | DHS 2010    | (6)     | 474/2205  | 22.02 (20.22-23.93) | 0.0634  | 876/5187   | 17.08 (15.96-18.27) | <0.0001 |
|            | DHS 2014/15 | (6)     | 376/1963  | 18.99 (17.12-21.01) | 0.0306  | 798/4792   | 16.74 (15.56-17.99) | 0.6888  |
| Tanzania   | DHS 1996    | (3)     | 364/668   | 53.93 (49.75-58.06) |         | 1836/3109  | 59.57 (56.84-62.24) |         |
|            | DHS 1999    | (3)     | 530/1080  | 55.14 (49.97-60.20) | 0.6864  | 930/1524   | 65.70 (61.58-69.60) | 0.0156  |
|            | AIS 2003/04 | (5)     | 754/1922  | 39.87 (37.24-42.57) | <0.0001 | 1467/2647  | 54.78 (52.27-57.25) | <0.0001 |
|            | DHS 2004/05 | (4)     | 344/856   | 44.49 (40.52-48.53) | 0.0611  | 2140/3790  | 60.98 (58.59-63.32) | 0.0004  |
|            | AIS 2007/08 | (5)     | 713/2082  | 41.25 (38.33-44.24) | 0.1995  | 1646/3190  | 57.53 (55.12-59.91) | 0.0443  |
|            | DHS 2010    | (5)     | 281/763   | 43.25 (38.98-47.62) | 0.4530  | 1792/3473  | 58.10 (55.67-60.50) | 0.7421  |
|            | AIS 2011/12 | (6)     | 928/2646  | 39.84 (37.24-42.50) | 0.1855  | 1802/3744  | 50.23 (47.59-52.87) | <0.0001 |
|            | DHS 2015/16 | (7)     | 474/1118  | 46.18 (42.62-49.78) | 0.0049  | 2469/4577  | 57.48 (55.37-59.57) | <0.0001 |
| Uganda     | DHS 1995    | (3)     | 444/760   | 56.34 (52.23-60.36) |         | 2040/2890  | 71.79 (69.38-74.08) |         |
|            | DHS 2000/01 | (4)     | 230/652   | 36.08 (31.98-40.39) | <0.0001 | 1857/2868  | 66.88 (64.63-69.06) | 0.0032  |
|            | DHS 2006    | (5)     | 355/748   | 47.65 (43.49-51.83) | 0.0002  | 1977/3072  | 65.73 (63.45-67.94) | 0.4733  |
|            | DHS 2011    | (6)     | 279/705   | 40.07 (35.86-44.42) | 0.0182  | 1859/3284  | 59.77 (57.48-62.01) | 0.0002  |
|            | DHS 2016    | (7)     | 804/1684  | 47.06 (44.20-49.94) | 0.0150  | 3973/6796  | 56.99 (55.25-58.72) | 0.0680  |
| Zambia     | DHS 1996    | (3)     | 465/648   | 69.86 (65.83-73.61) |         | 2222/3103  | 69.20 (67.06-71.27) |         |
|            | DHS 2001/02 | (4)     | 418/699   | 58.28 (53.66-62.76) | 0.0002  | 1959/3009  | 62.79 (60.35-65.17) | 0.0001  |
|            | DHS 2007    | (5)     | 1094/2052 | 50.78 (47.96-53.59) | 0.0064  | 1679/2779  | 59.12 (56.46-61.72) | 0.0432  |
|            | DHS 2013/14 | (6)     | 2081/4240 | 46.47 (44.45-48.51) | 0.0139  | 3275/5829  | 55.45 (53.58-57.31) | 0.0275  |
| Zimbabwe   | DHS 1994    | (3)     | 263/675   | 36.49 (32.43-40.75) |         | 947/2142   | 41.32 (38.64-44.07) |         |
|            | DHS 1999    | (4)     | 289/882   | 30.58 (26.89-34.54) | 0.0423  | 832/2243   | 34.21 (31.56-36.95) | 0.0003  |
|            | DHS 2005/06 | (5)     | 662/2470  | 25.89 (23.97-27.91) | 0.0253  | 1295/3384  | 37.54 (35.54-39.58) | 0.0538  |
|            | DHS 2010/11 | (6)     | 592/2518  | 22.27 (20.47-24.19) | 0.0126  | 1330/3511  | 36.40 (34.45-38.39) | 0.4443  |
|            | DHS 2015    | (7)     | 705/2542  | 26.80 (24.66-29.06) | 0.0021  | 1353/3438  | 40.97 (38.61-43.36) | 0.0035  |

Sample sizes (n/N) refer to unadjusted numbers of people reporting an age at first sex before the age of 18 years (n) among everyone (including those who have not had sex before) who was aged 20-29 years (N). Proportions (%) and 95% confidence intervals (95% CI) are adjusted for survey design and sampling weights. The p-values refer to results from logistic regressions with odds ratios of age at first sex before 18 years calculated for one survey compared with the preceding one, adjusted for age. These are also adjusted for survey design and sampling weights.

## 7. References

1. StataCorp. STATA Survey Data Reference Manual Release 14. College Station, TX: StataCorp LLC; 2015.
2. Ministry of Health Federal Democratic Republic of Ethiopia. National Guidelines for Comprehensive HIV Prevention, Care and Treatment. Addis Ababa: Ministry of Health Federal Democratic Republic of Ethiopia; 2014.
3. UNAIDS. AIDSinfo [Website]. 2018. Available from: <http://aidsinfo.unaids.org/> [Accessed 18 April 2018].
4. World Health Organization. Summary Country Profile for HIV/AIDS Treatment Scale-Up: Kenya. Geneva: World Health Organization; 2005.
5. World Health Organization. Summary Country Profile for HIV/AIDS Treatment Scale-Up: Lesotho. Geneva: World Health Organization; 2005.
6. Ministry of Health Lesotho. Global AIDS Response Progress Report 2015: Lesotho Country Report. Maseru: Ministry of Health Lesotho; 2015.
7. World Health Organization. Summary Country Profile for HIV/AIDS Treatment Scale-Up: Malawi. Geneva: World Health Organization; 2005.
8. Council of Ministers. National Strategic HIV and AIDS Response Plan 2010 – 2014 Maputo: National AIDS Council (Conselho Nacional de Combate ao SIDA), Republic of Mozambique; 2010.
9. World Health Organization. Summary Country Profile for HIV/AIDS Treatment Scale-Up: Namibia. Geneva: World Health Organization; 2005.
10. Ministry of Health and Social Services Namibia. United Nations General Assembly Special Session (UNGASS) Country Report: Reporting Period 2008 - 2009. Windhoek: Ministry of Health and Social Services Namibia; 2010.
11. World Health Organization. Summary Country Profile for HIV/AIDS Treatment Scale-Up: Rwanda. Geneva: World Health Organization; 2005.
12. Rwanda Biomedical Center. National HIV Annual Report 2013-2014. Kigali: Ministry of Health Rwanda; 2014.
13. World Health Organization. Summary Country Profile for HIV/AIDS Treatment Scale-Up: United Republic of Tanzania. Geneva: World Health Organization; 2005.
14. World Health Organization. Summary Country Profile for HIV/AIDS Treatment Scale-Up: Uganda. Geneva: World Health Organization; 2005.
15. World Health Organization. Summary Country Profile for HIV/AIDS Treatment Scale-Up: Zambia. Geneva: World Health Organization; 2005.
16. National HIV/AIDS/STI/TB Council Zambia. National AIDS Strategic Framework 2011-2015. Lusaka: Ministry of Health Zambia; 2010.
17. World Health Organization. Summary Country Profile for HIV/AIDS Treatment Scale-Up: Zimbabwe. Geneva: World Health Organization; 2005.
18. Ministry of Health Zimbabwe. Global AIDS Response Progress Report 2012: Zimbabwe Country Report. Harare: Ministry of Health Zimbabwe; 2012.
